# Supplementary material
Source: PubMed Central journal article supplement (PMC8208635)
Supplement: NIHMS1708431-supplement-Figure_S6.pdf [file NIHMS1708431-supplement-Figure_S6.pdf]

A

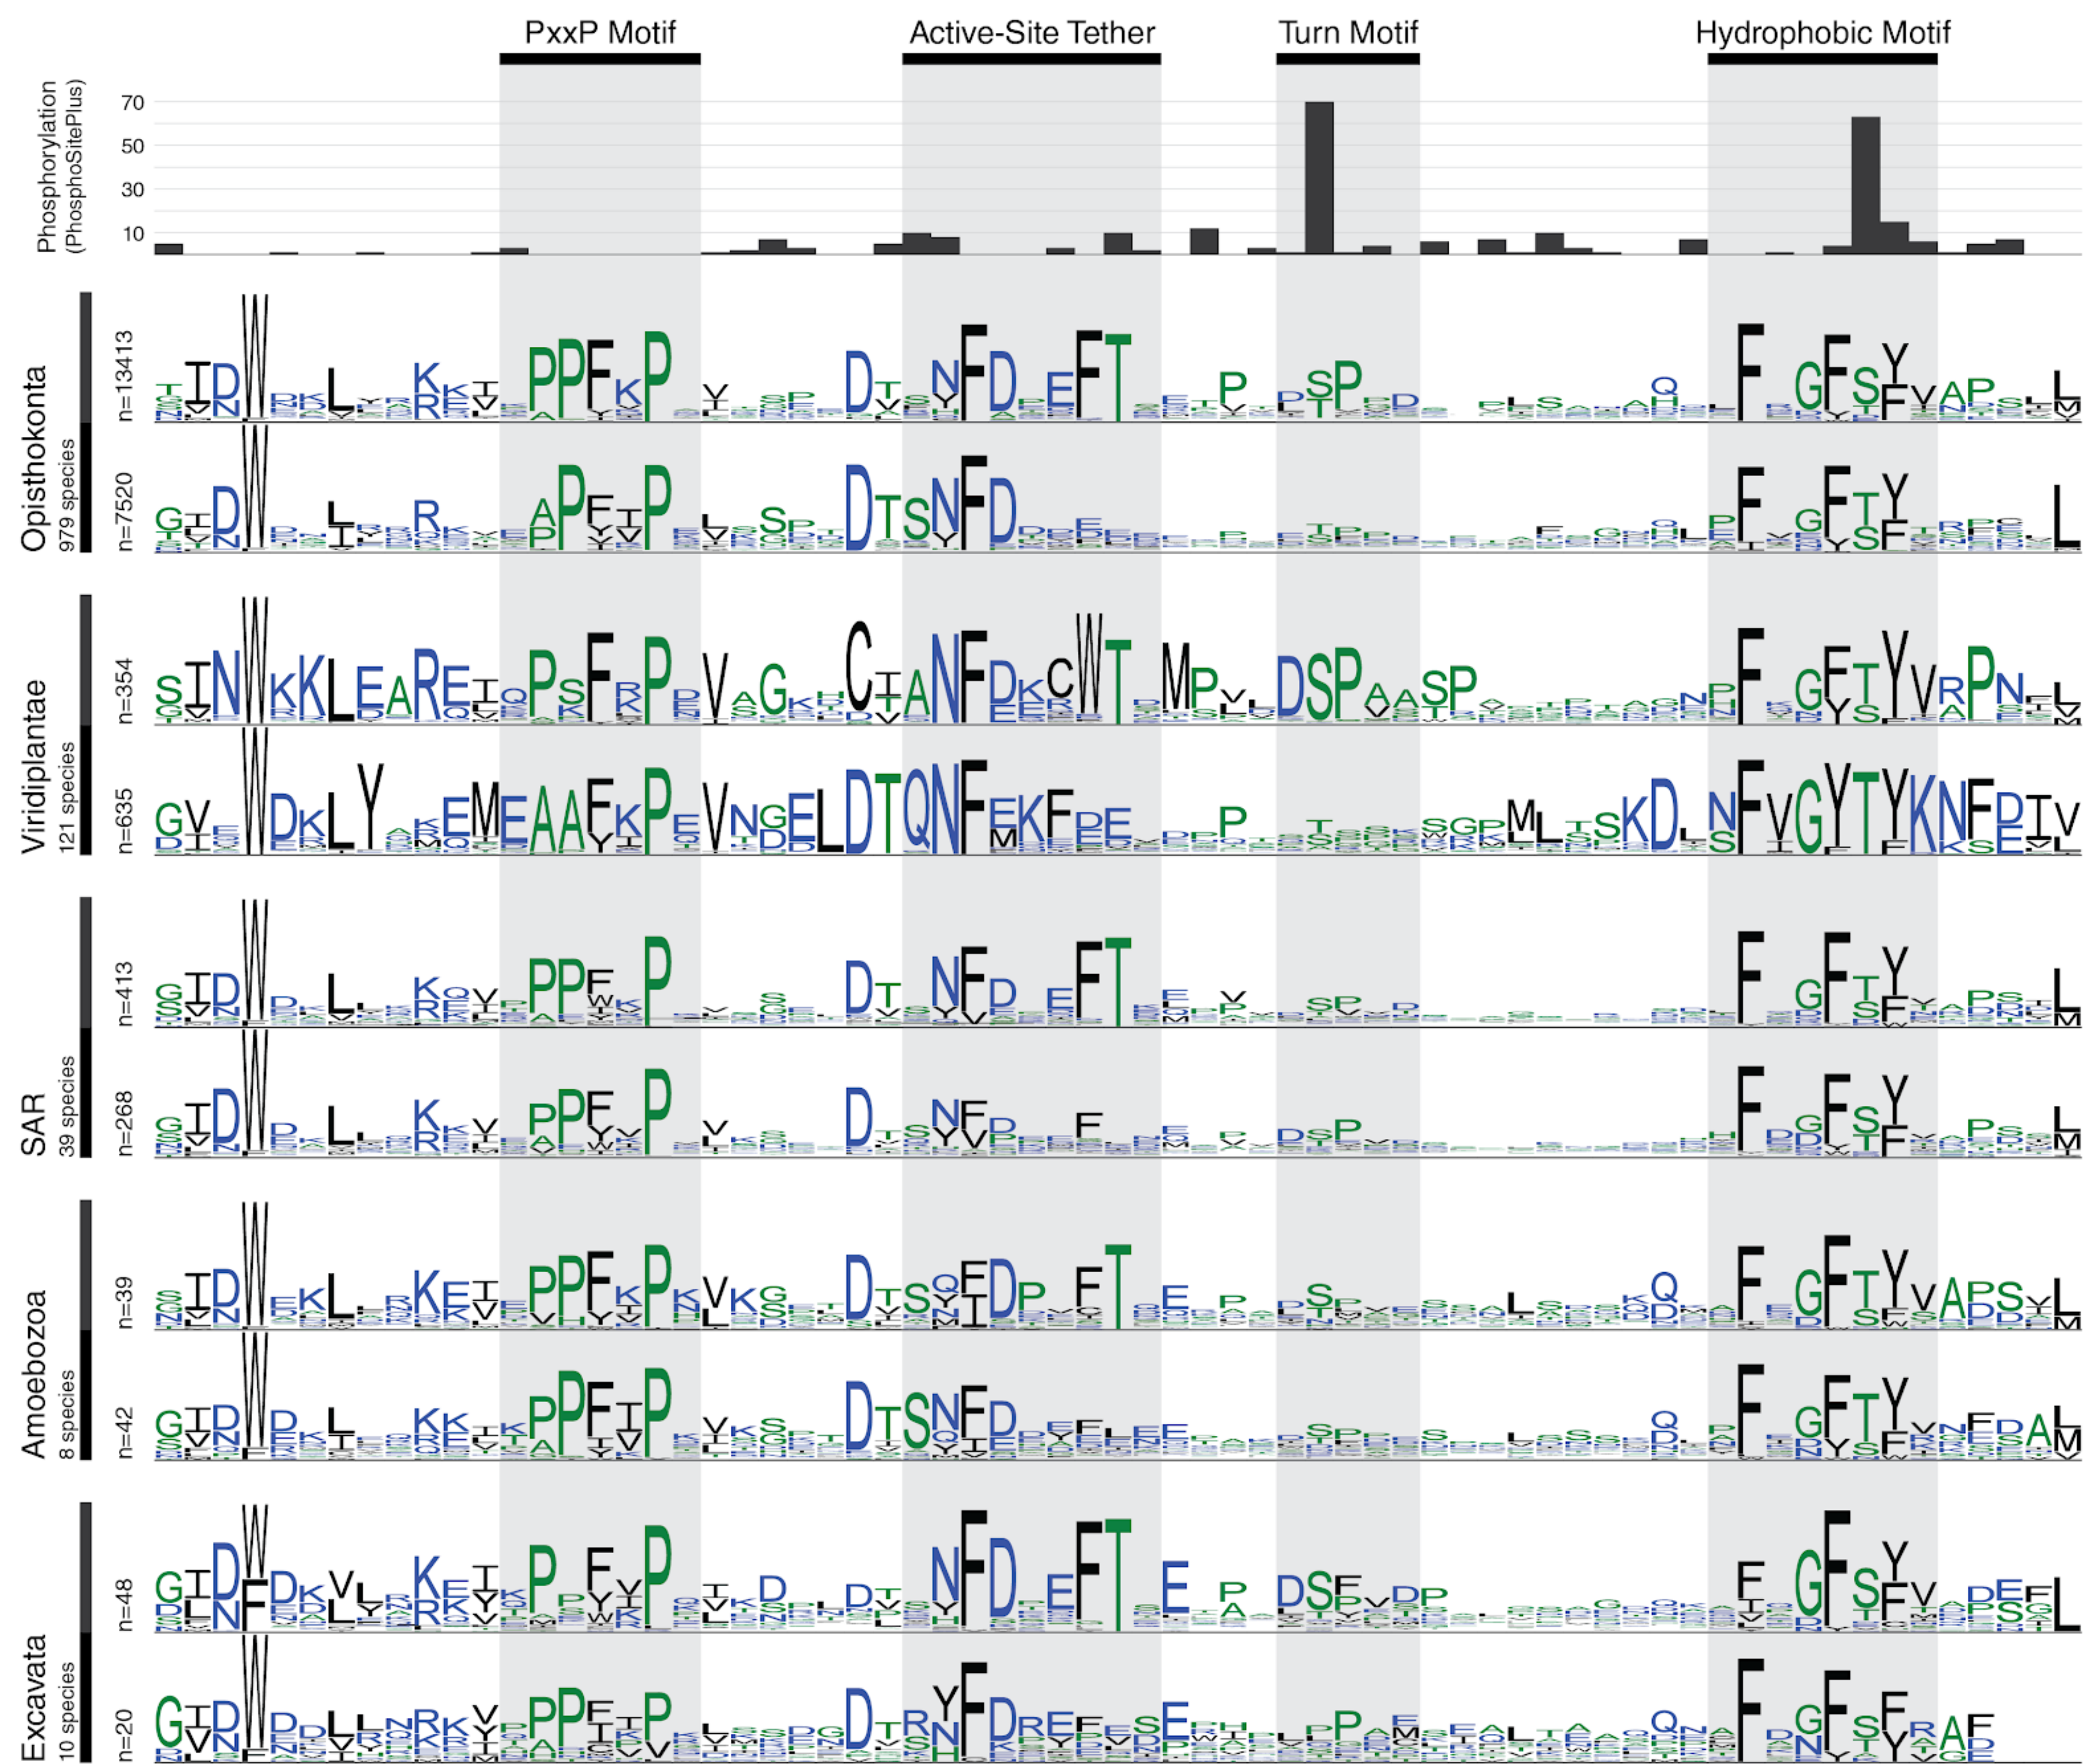

B

|                                           | SGK        | NDR        | MAST      | RSK        | PKC        | PKN       | Akt      | DMPK       | PKA        | PKG      | GRK     | YANK    |
|-------------------------------------------|------------|------------|-----------|------------|------------|-----------|----------|------------|------------|----------|---------|---------|
| <b>Opisthokonta with TIM-site Thr</b>     | 2614 (19%) | 169 (1%)   | 16 (0%)   | 5024 (37%) | 2907 (22%) | 1210 (9%) | 977 (7%) | 209 (2%)   | 156 (1%)   | 81 (1%)  | 47 (0%) | 3 (0%)  |
| <b>Opisthokonta without TIM-site Thr</b>  | 273 (4%)   | 1347 (18%) | 876 (12%) | 22 (0%)    | 664 (9%)   | 24 (0%)   | 15 (0%)  | 2396 (32%) | 1379 (18%) | 424 (6%) | 10 (0%) | 90 (1%) |
| <b>Viridiplantae with TIM-site Thr</b>    | 309 (87%)  | 22 (6%)    | 1 (0%)    | 17 (5%)    | 0 (0%)     | 0 (0%)    | 0 (0%)   | 0 (0%)     | 3 (1%)     | 1 (0%)   | 0 (0%)  | 1 (0%)  |
| <b>Viridiplantae without TIM-site Thr</b> | 3 (0%)     | 614 (97%)  | 0 (0%)    | 0 (0%)     | 0 (0%)     | 0 (0%)    | 0 (0%)   | 1 (0%)     | 15 (2%)    | 1 (0%)   | 0 (0%)  | 1 (0%)  |
| <b>SAR with TIM-site Thr</b>              | 383 (93%)  | 1 (0%)     | 0 (0%)    | 1 (0%)     | 0 (0%)     | 0 (0%)    | 0 (0%)   | 0 (0%)     | 23 (6%)    | 2 (0%)   | 0 (0%)  | 3 (1%)  |
| <b>SAR without TIM-site Thr</b>           | 168 (63%)  | 17 (6%)    | 10 (4%)   | 0 (0%)     | 0 (0%)     | 0 (0%)    | 0 (0%)   | 0 (0%)     | 57 (21%)   | 10 (4%)  | 0 (0%)  | 6 (2%)  |
| <b>Amoebozoa with TIM-site Thr</b>        | 35 (90%)   | 3 (8%)     | 1 (3%)    | 0 (0%)     | 0 (0%)     | 0 (0%)    | 0 (0%)   | 0 (0%)     | 0 (0%)     | 0 (0%)   | 0 (0%)  | 0 (0%)  |
| <b>Amoebozoa without TIM-site Thr</b>     | 20 (48%)   | 16 (38%)   | 1 (2%)    | 0 (0%)     | 0 (0%)     | 0 (0%)    | 0 (0%)   | 1 (2%)     | 4 (10%)    | 0 (0%)   | 0 (0%)  | 0 (0%)  |
| <b>Excavata with TIM-site Thr</b>         | 43 (90%)   | 2 (4%)     | 0 (0%)    | 0 (0%)     | 0 (0%)     | 0 (0%)    | 0 (0%)   | 0 (0%)     | 3 (6%)     | 0 (0%)   | 0 (0%)  | 0 (0%)  |
| <b>Excavata without TIM-site Thr</b>      | 8 (40%)    | 4 (20%)    | 3 (15%)   | 0 (0%)     | 0 (0%)     | 0 (0%)    | 0 (0%)   | 0 (0%)     | 5 (25%)    | 0 (0%)   | 0 (0%)  | 0 (0%)  |
