# Supplementary material
Source: PubMed Central journal article supplement (PMC8208635)

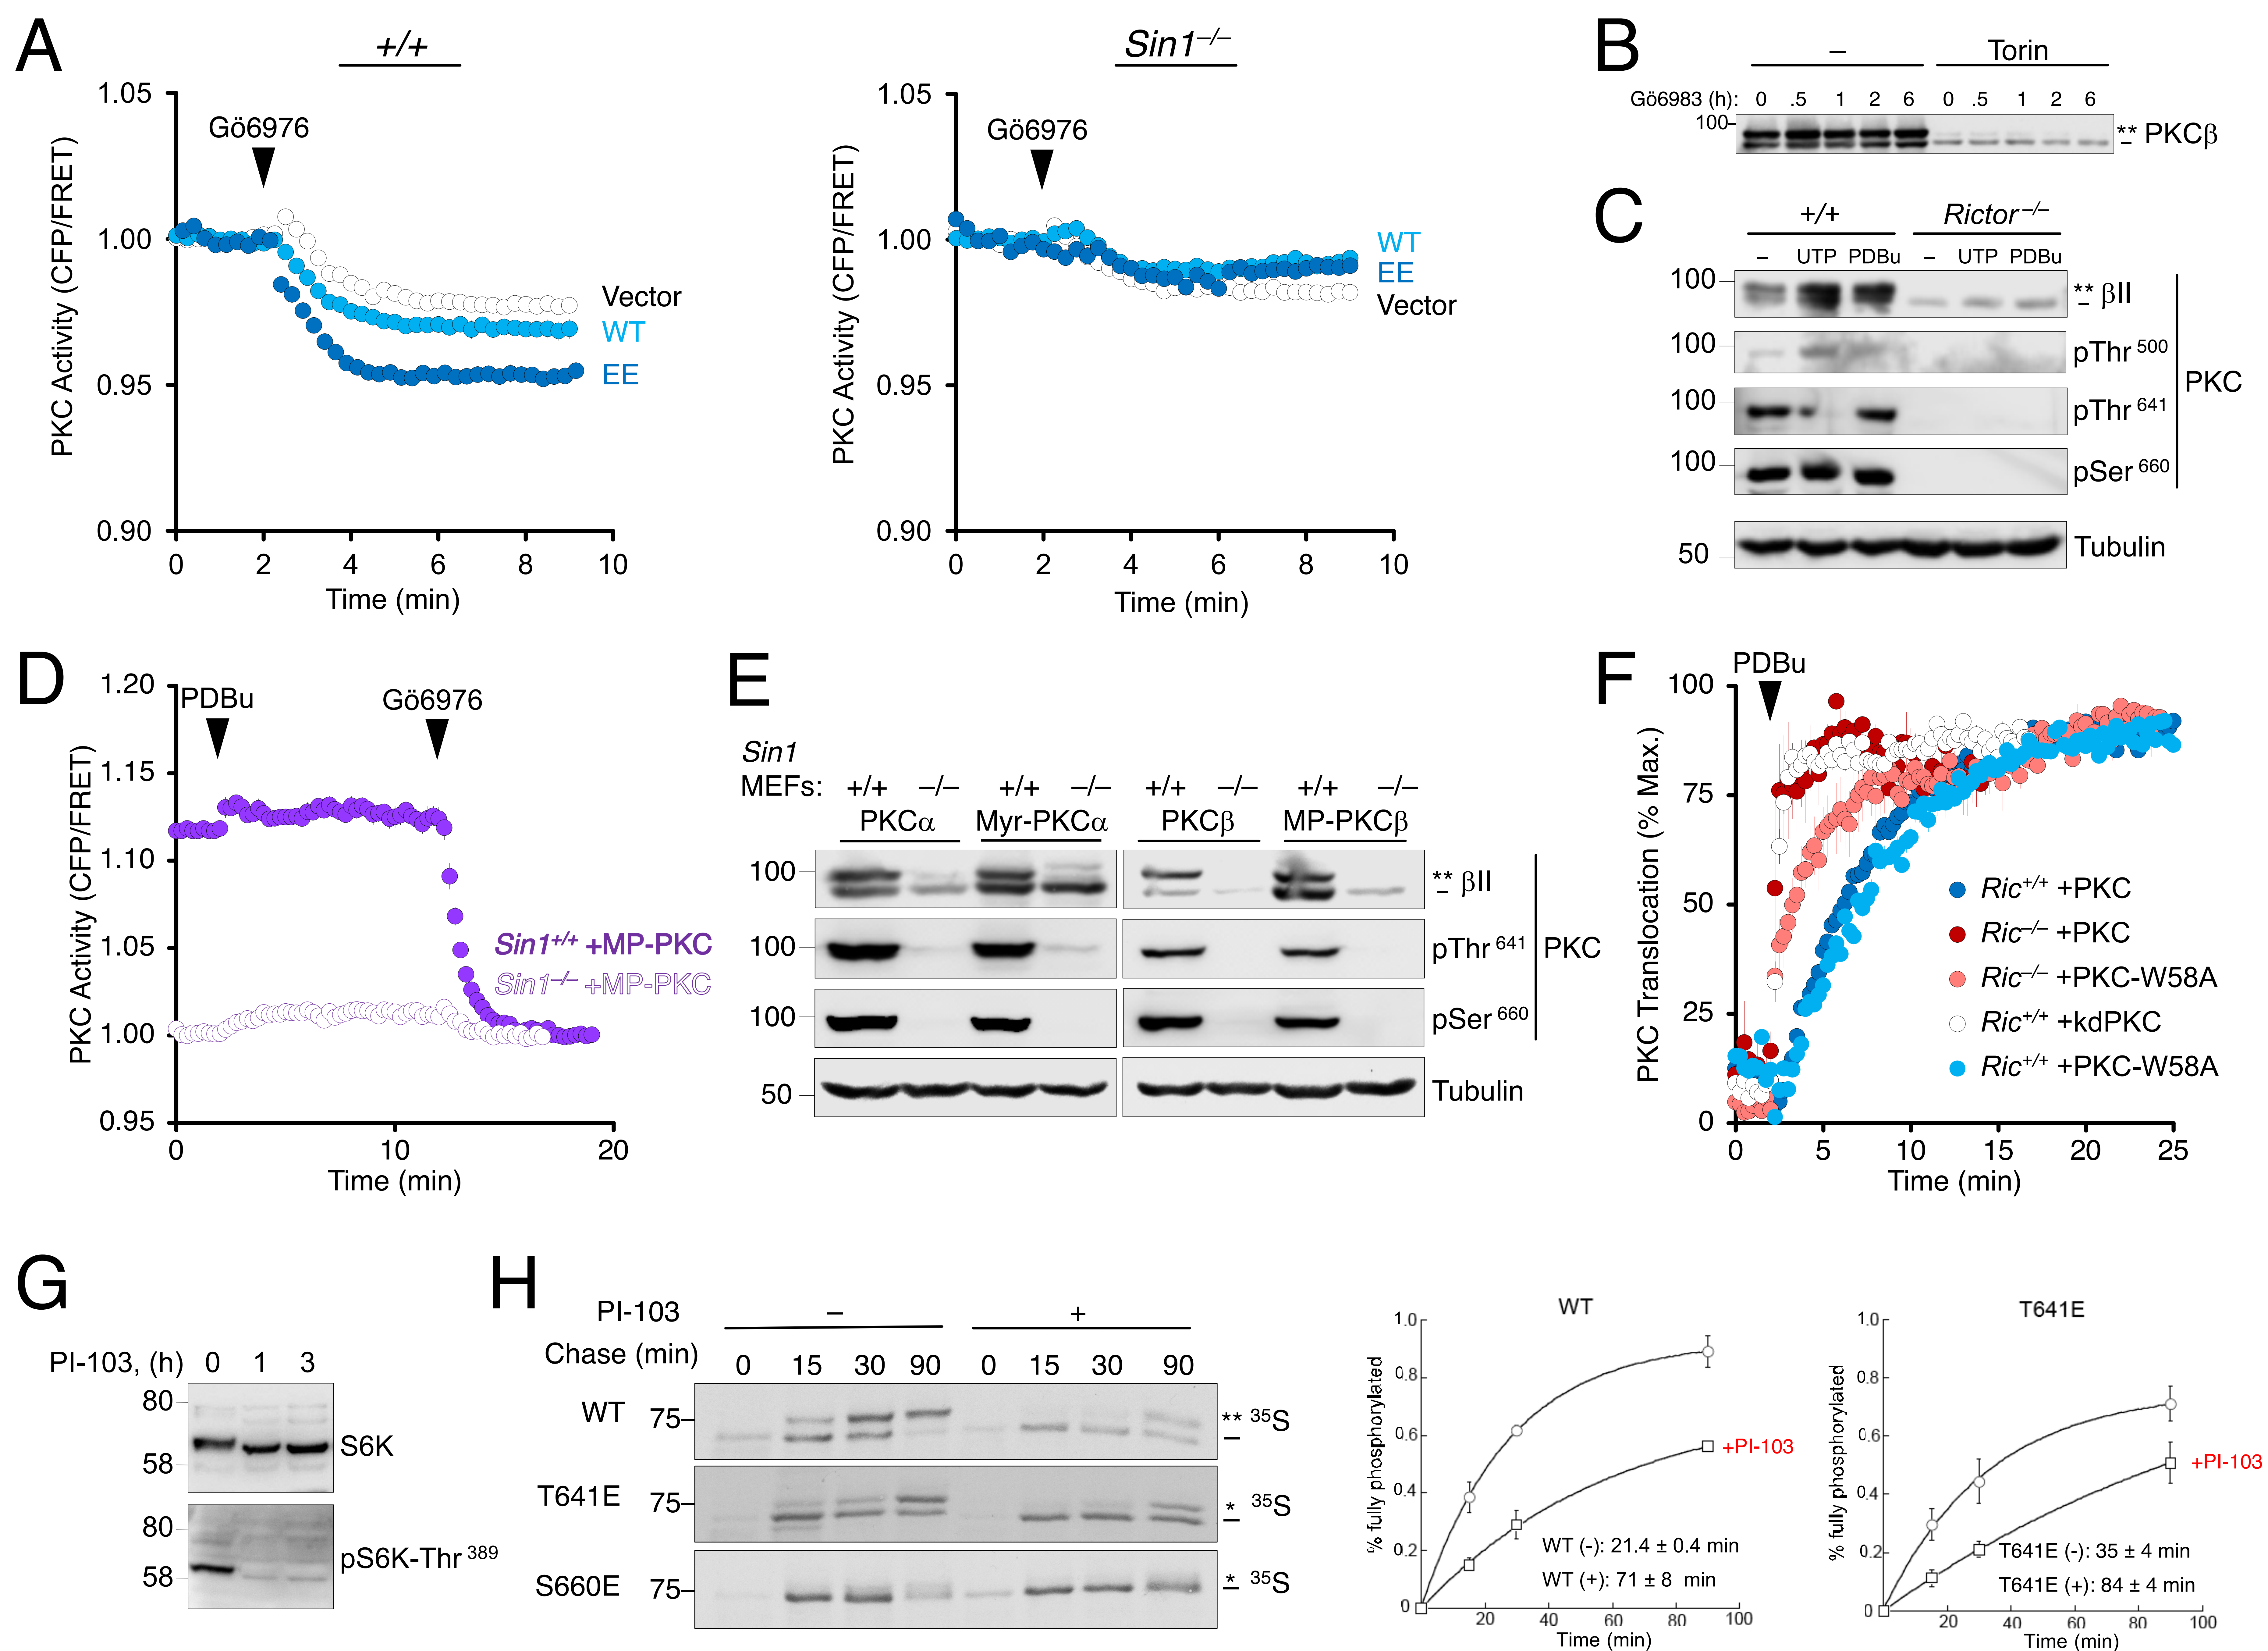

Supplement: NIHMS1708431-supplement-Figure_S1.pdf [file NIHMS1708431-supplement-Figure_S1.pdf]

A

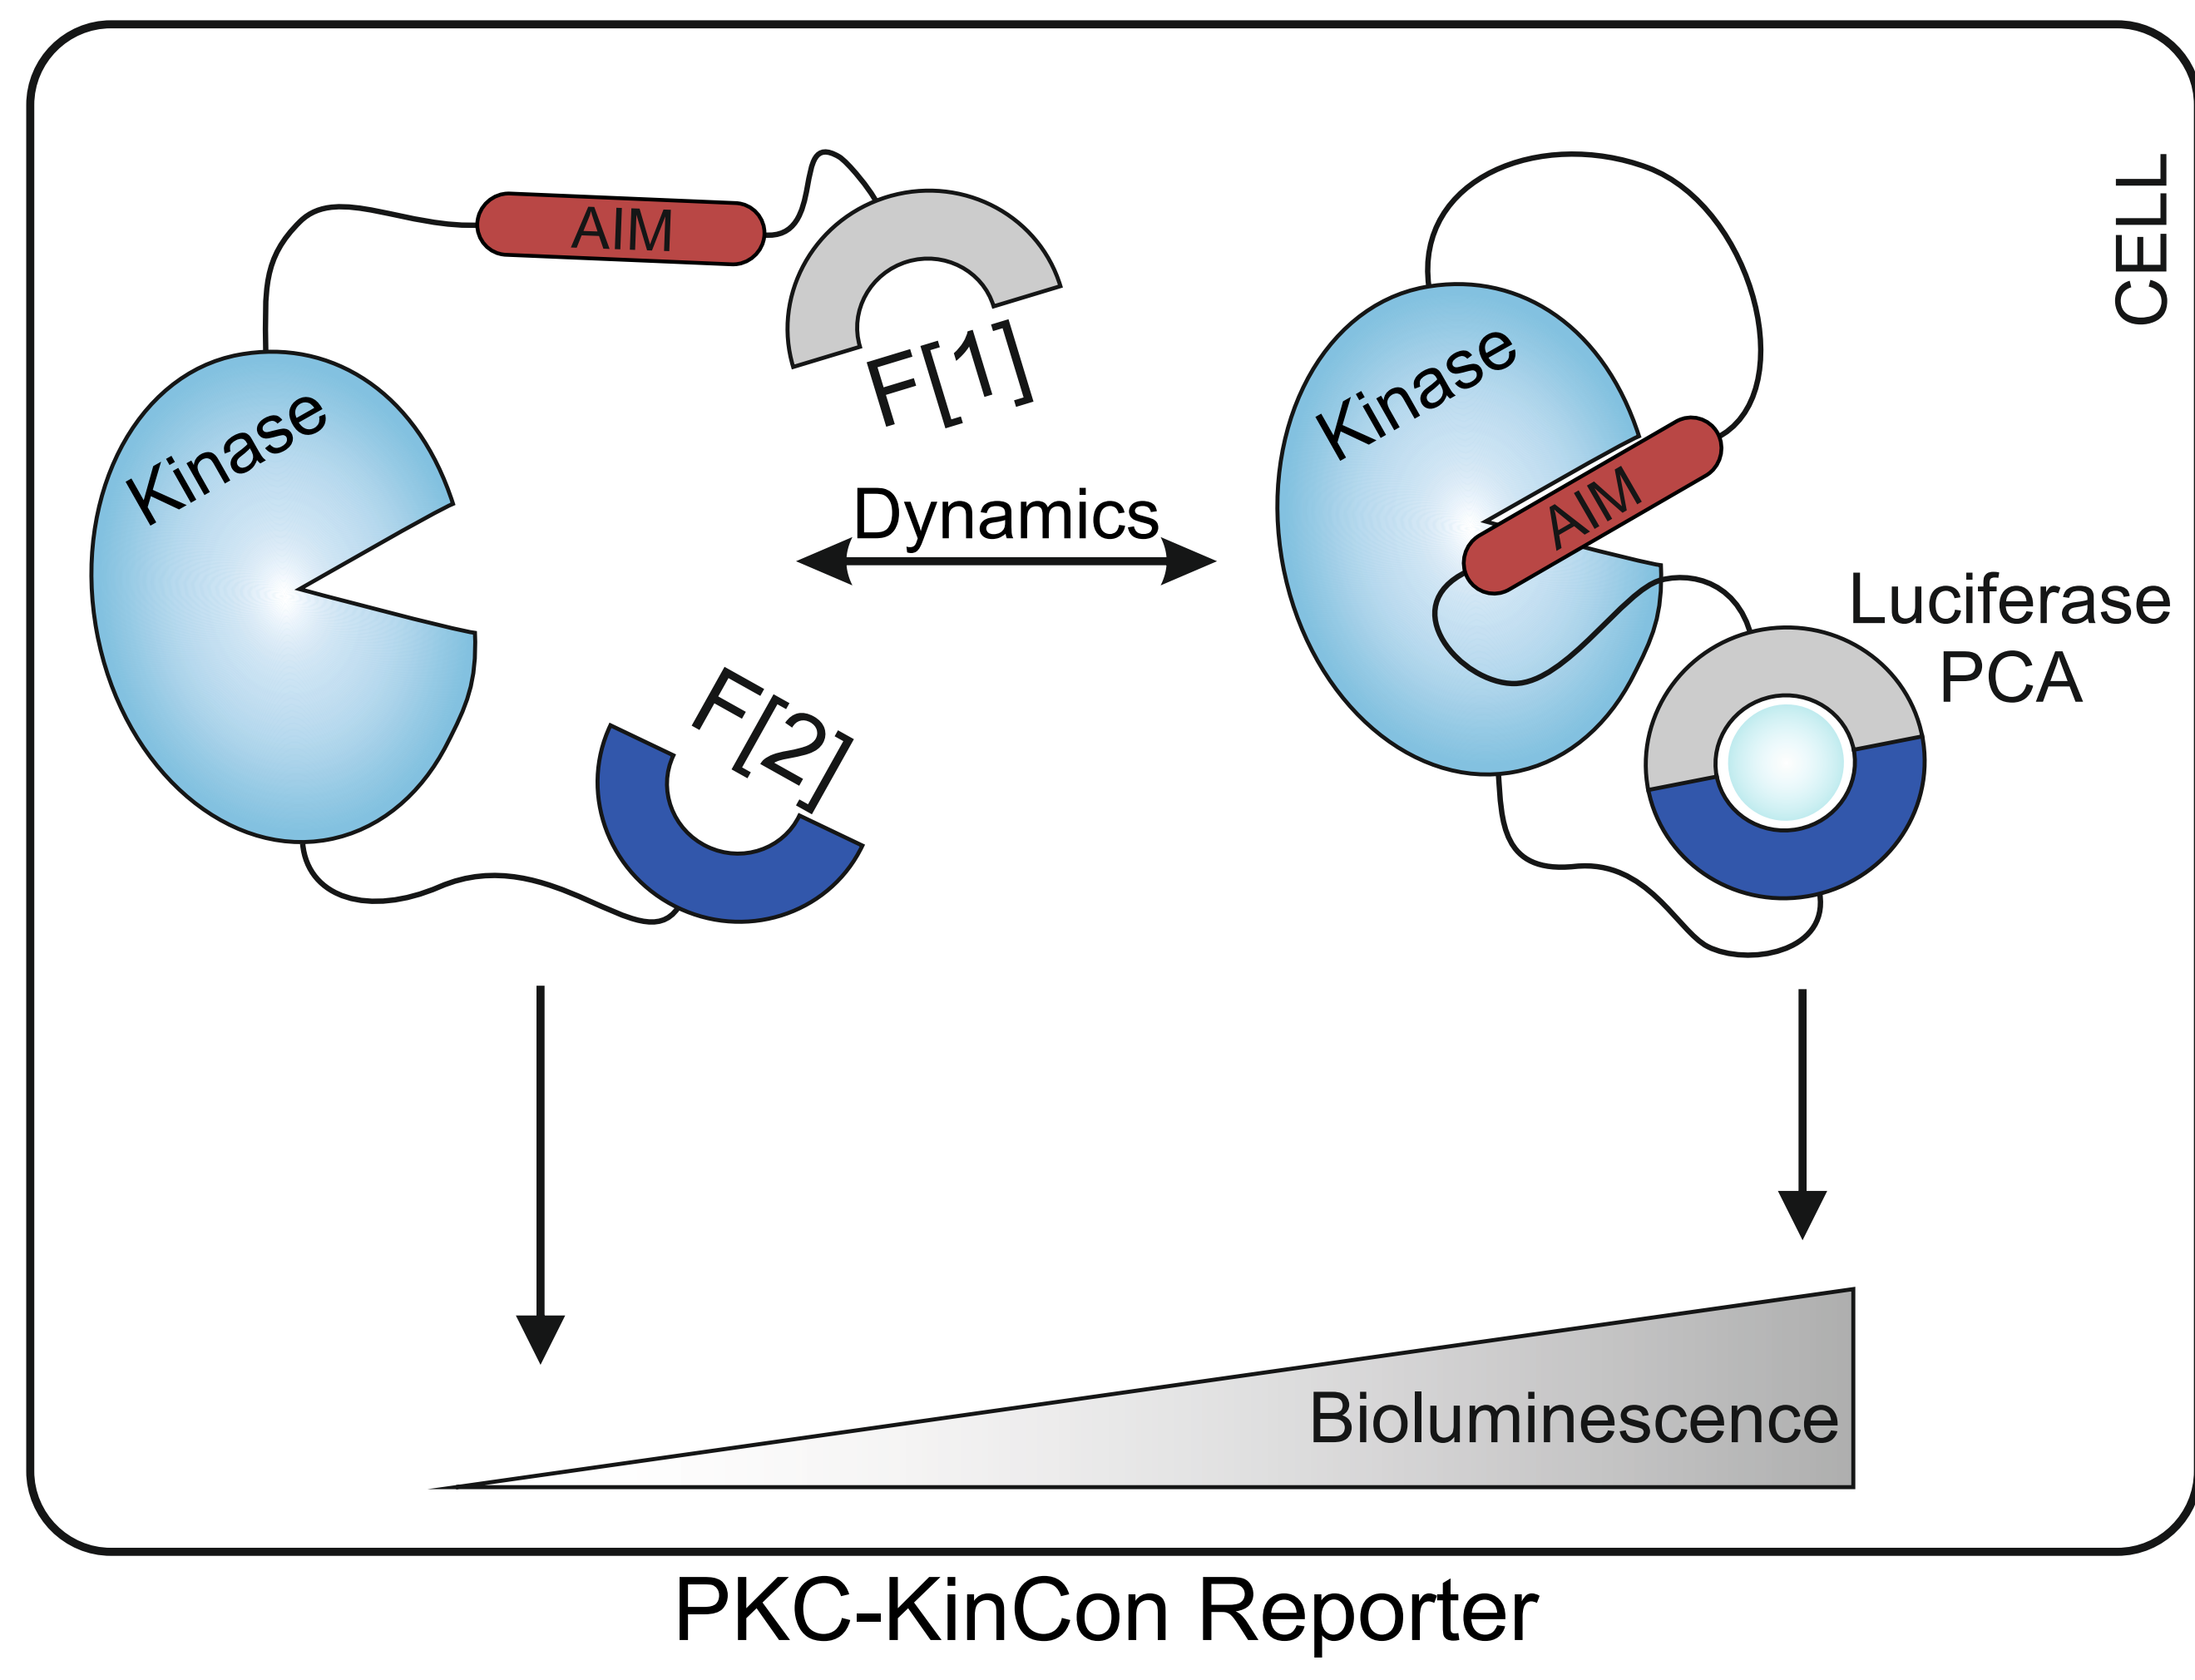

B

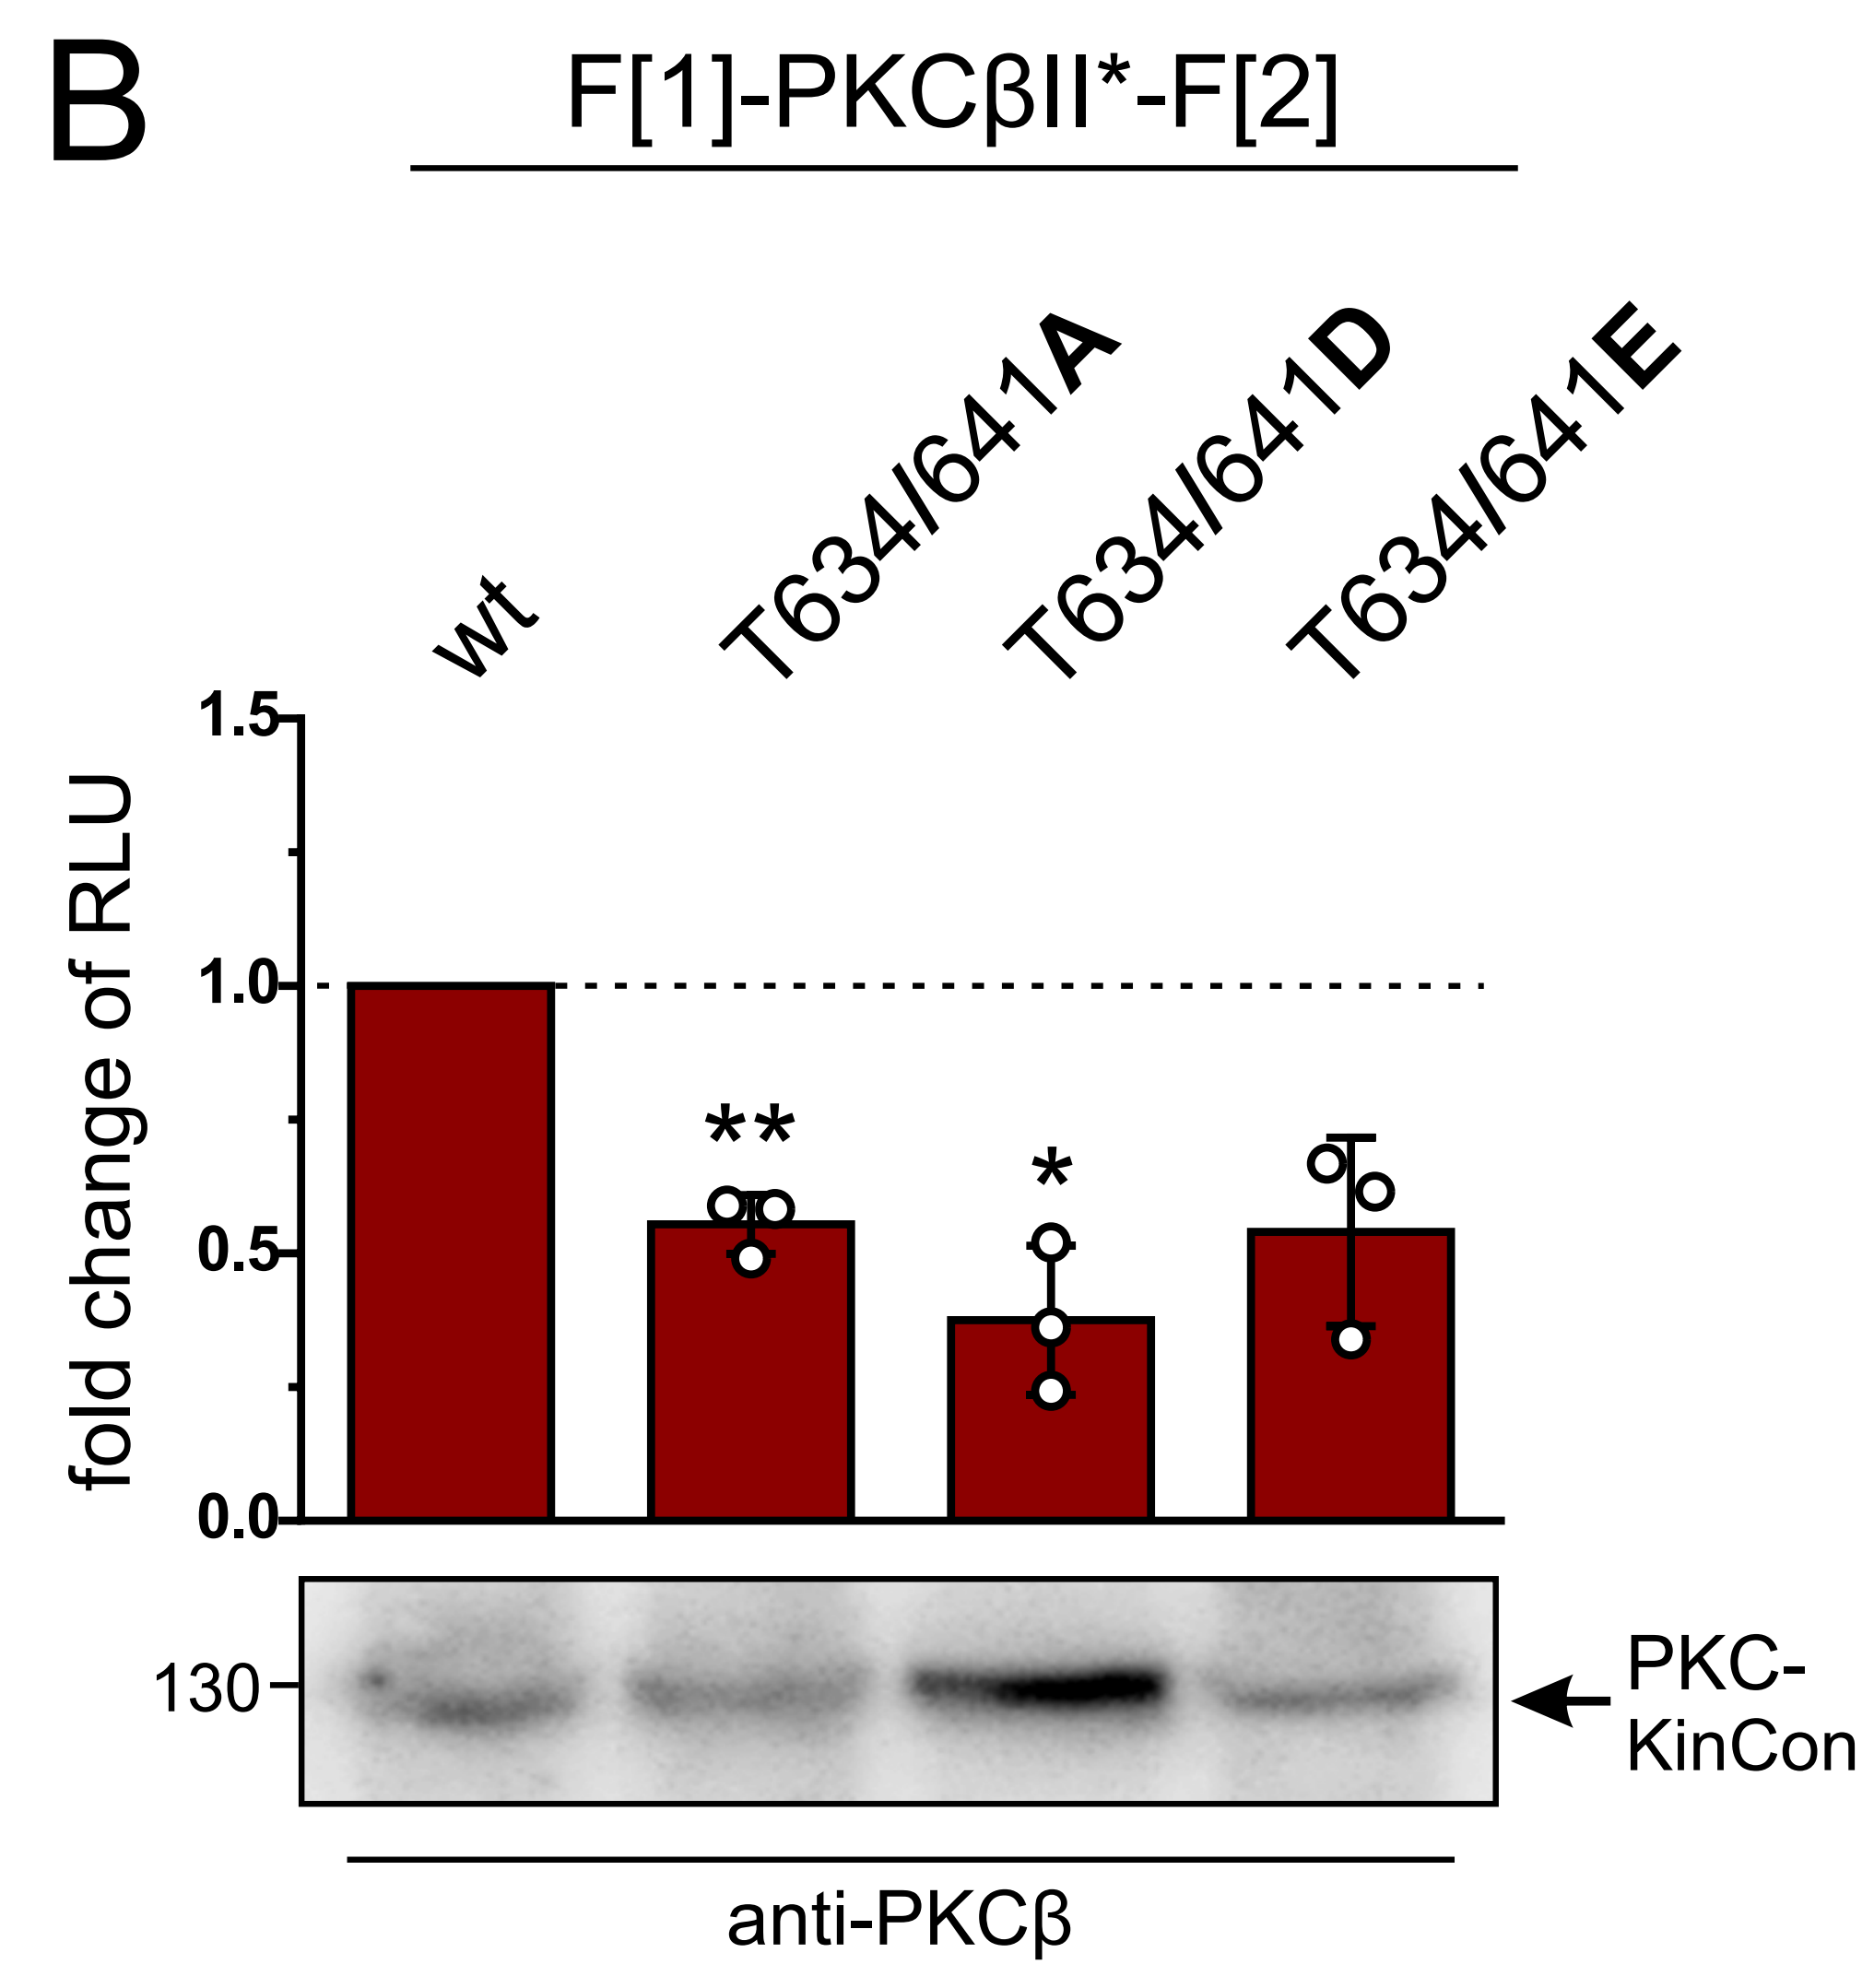

C

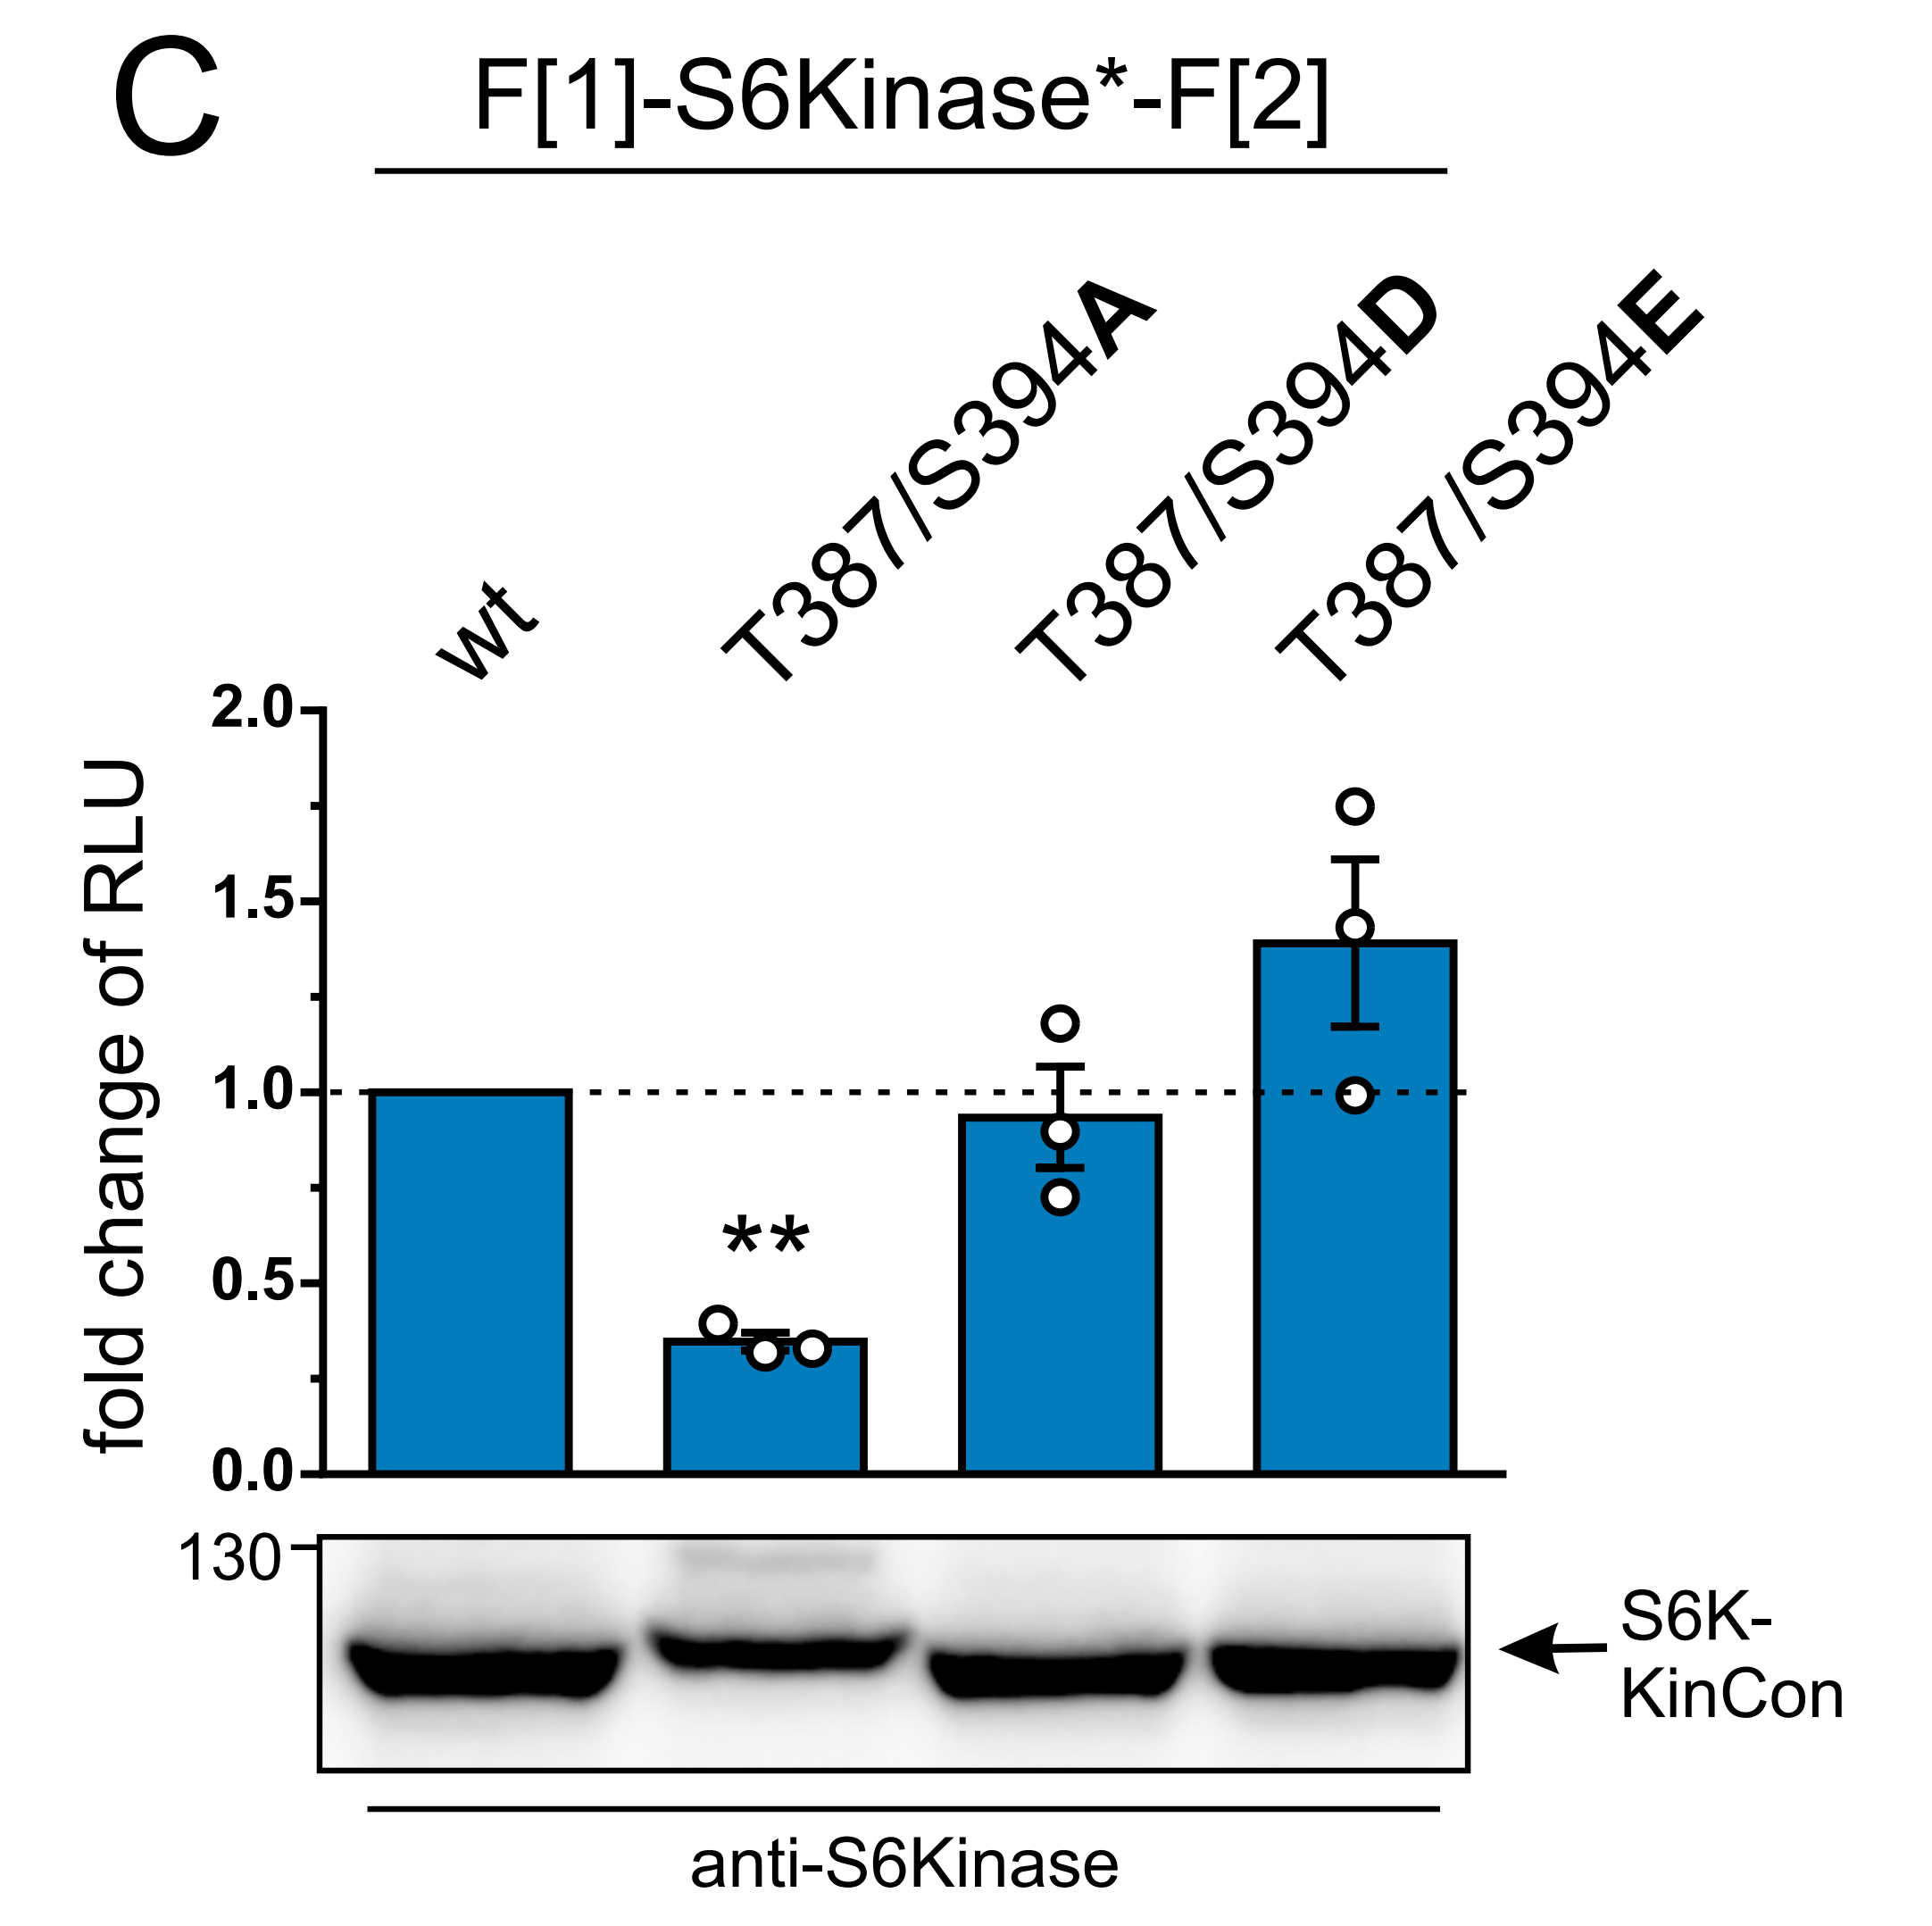

Supplement: NIHMS1708431-supplement-Figure_S10.pdf [file NIHMS1708431-supplement-Figure_S10.pdf]

A

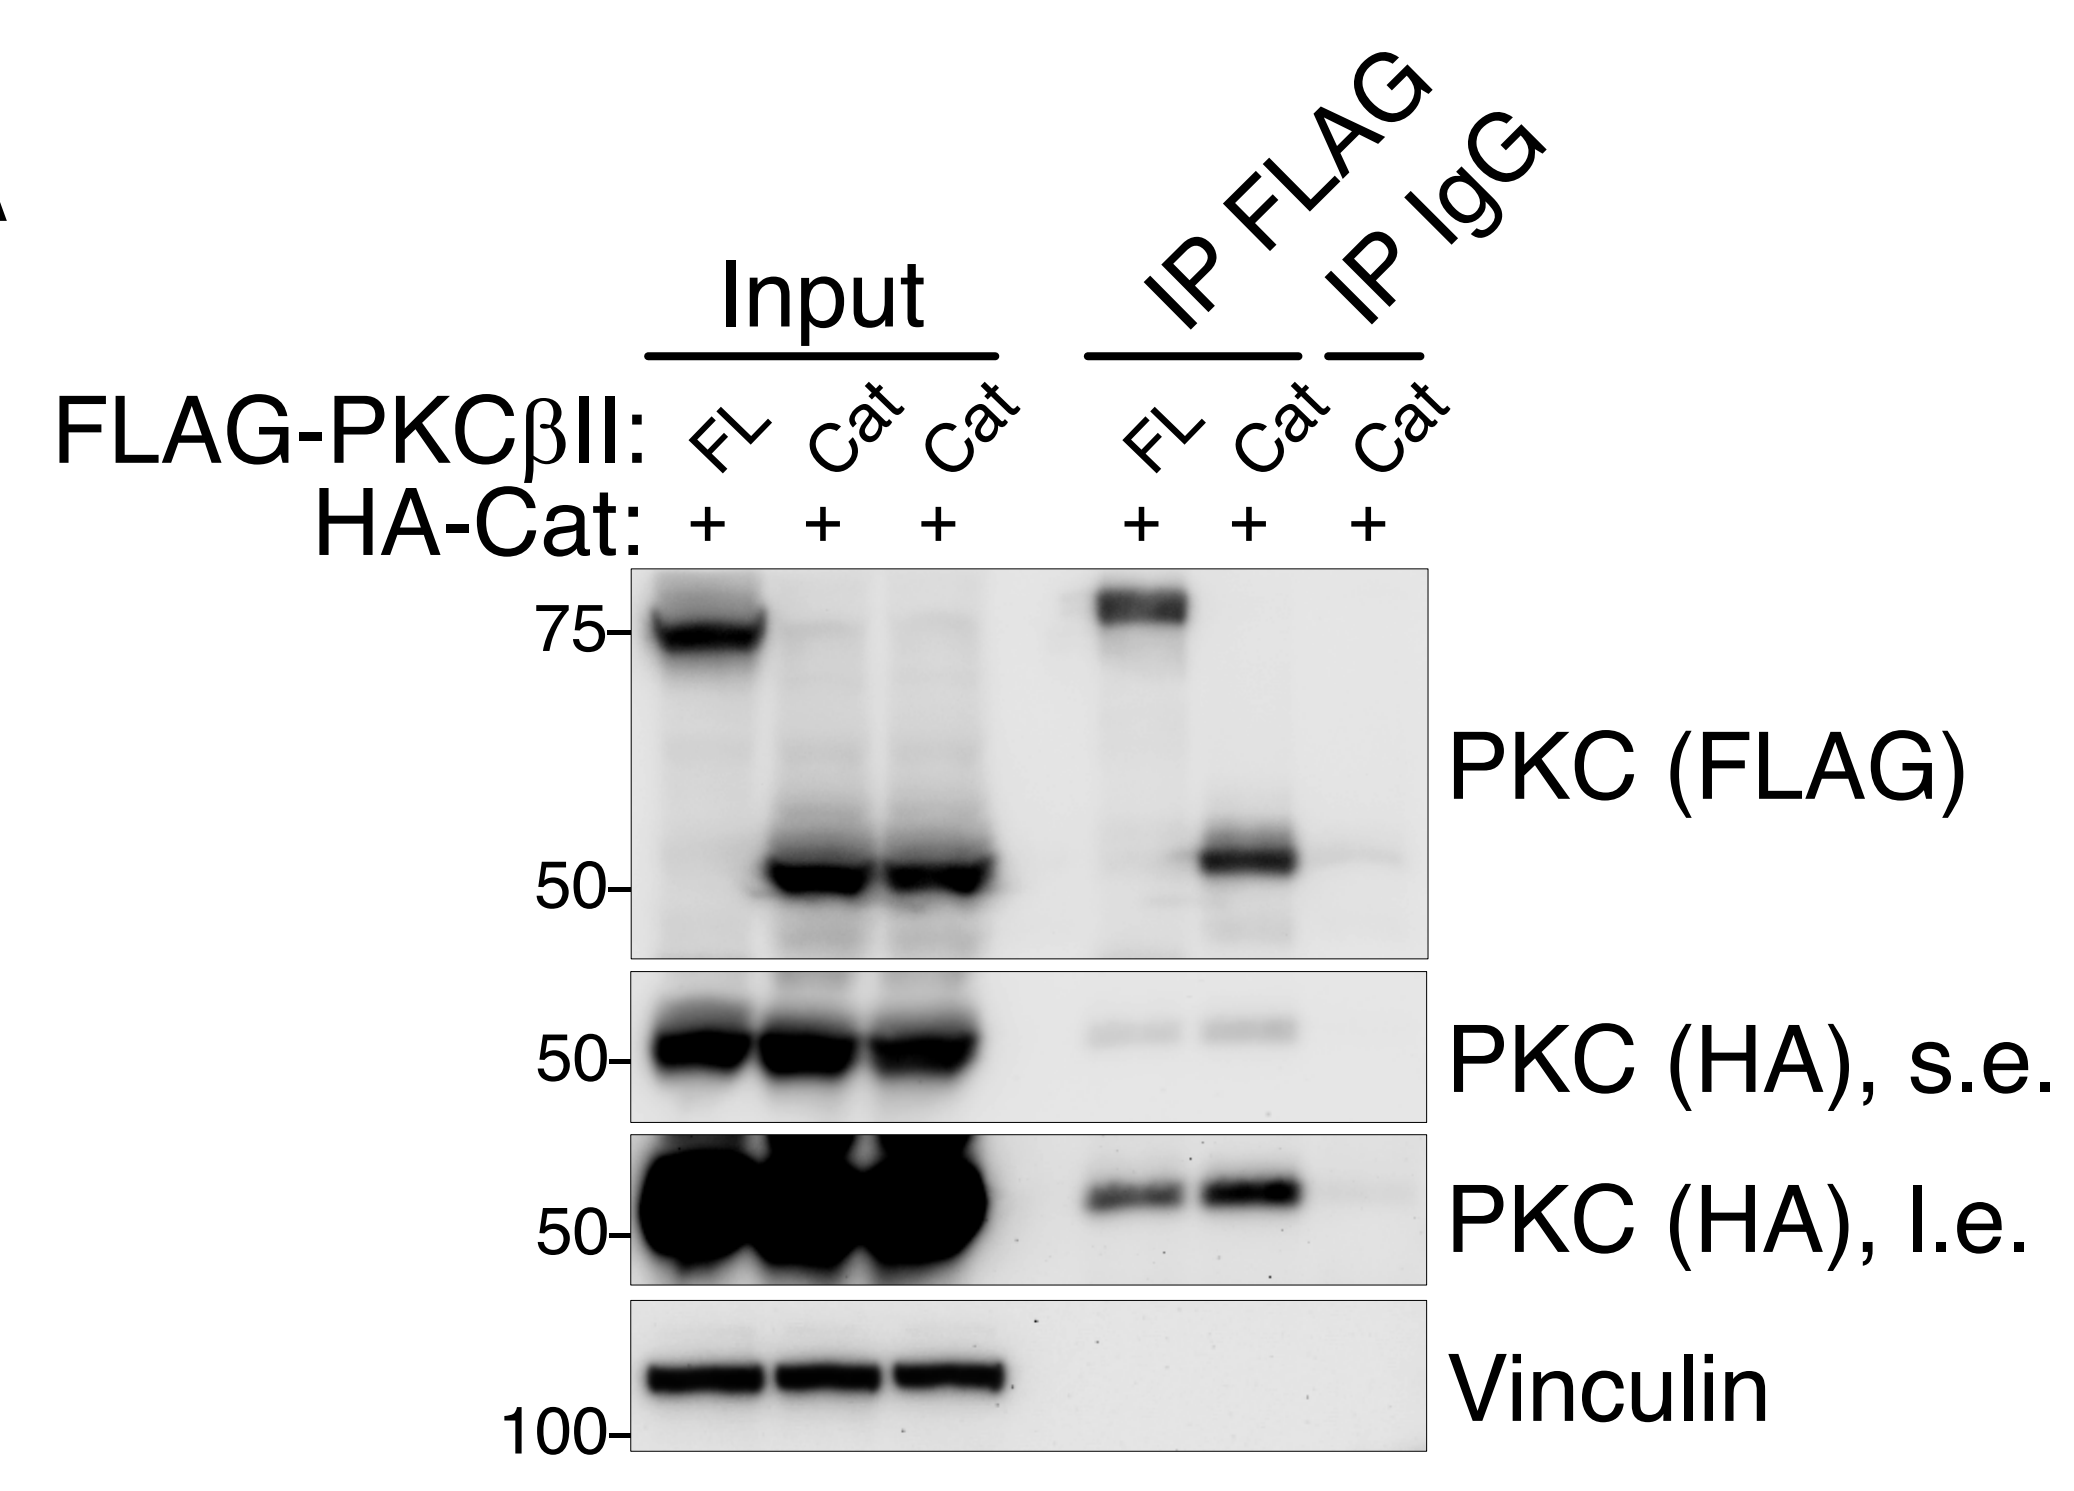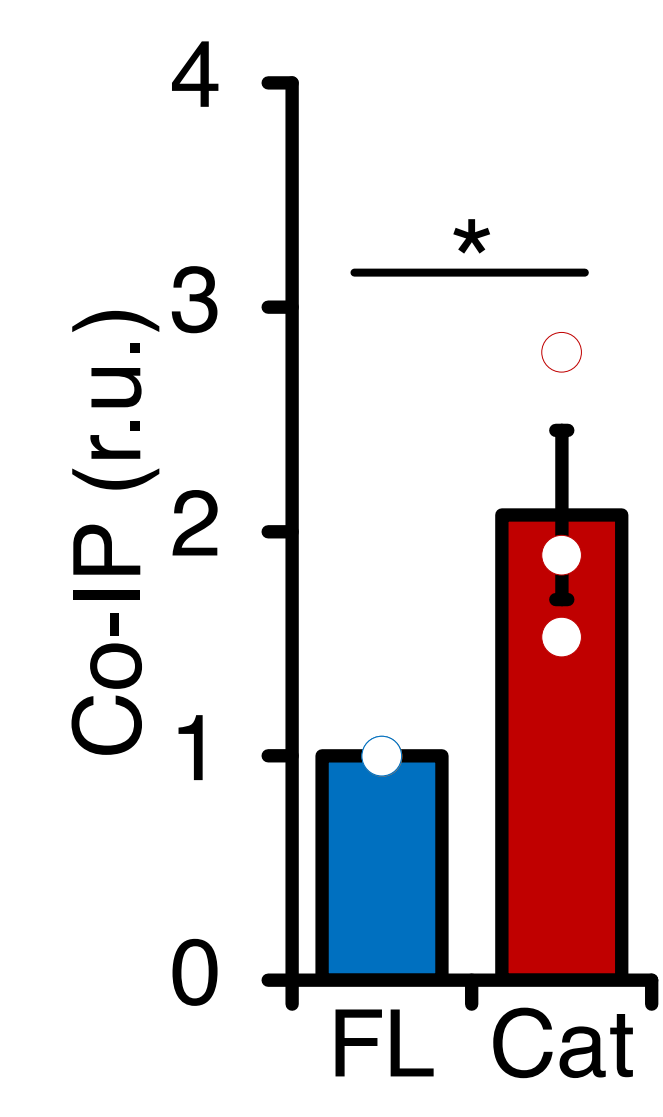

Supplement: NIHMS1708431-supplement-Figure_S11.pdf [file NIHMS1708431-supplement-Figure_S11.pdf]

**A**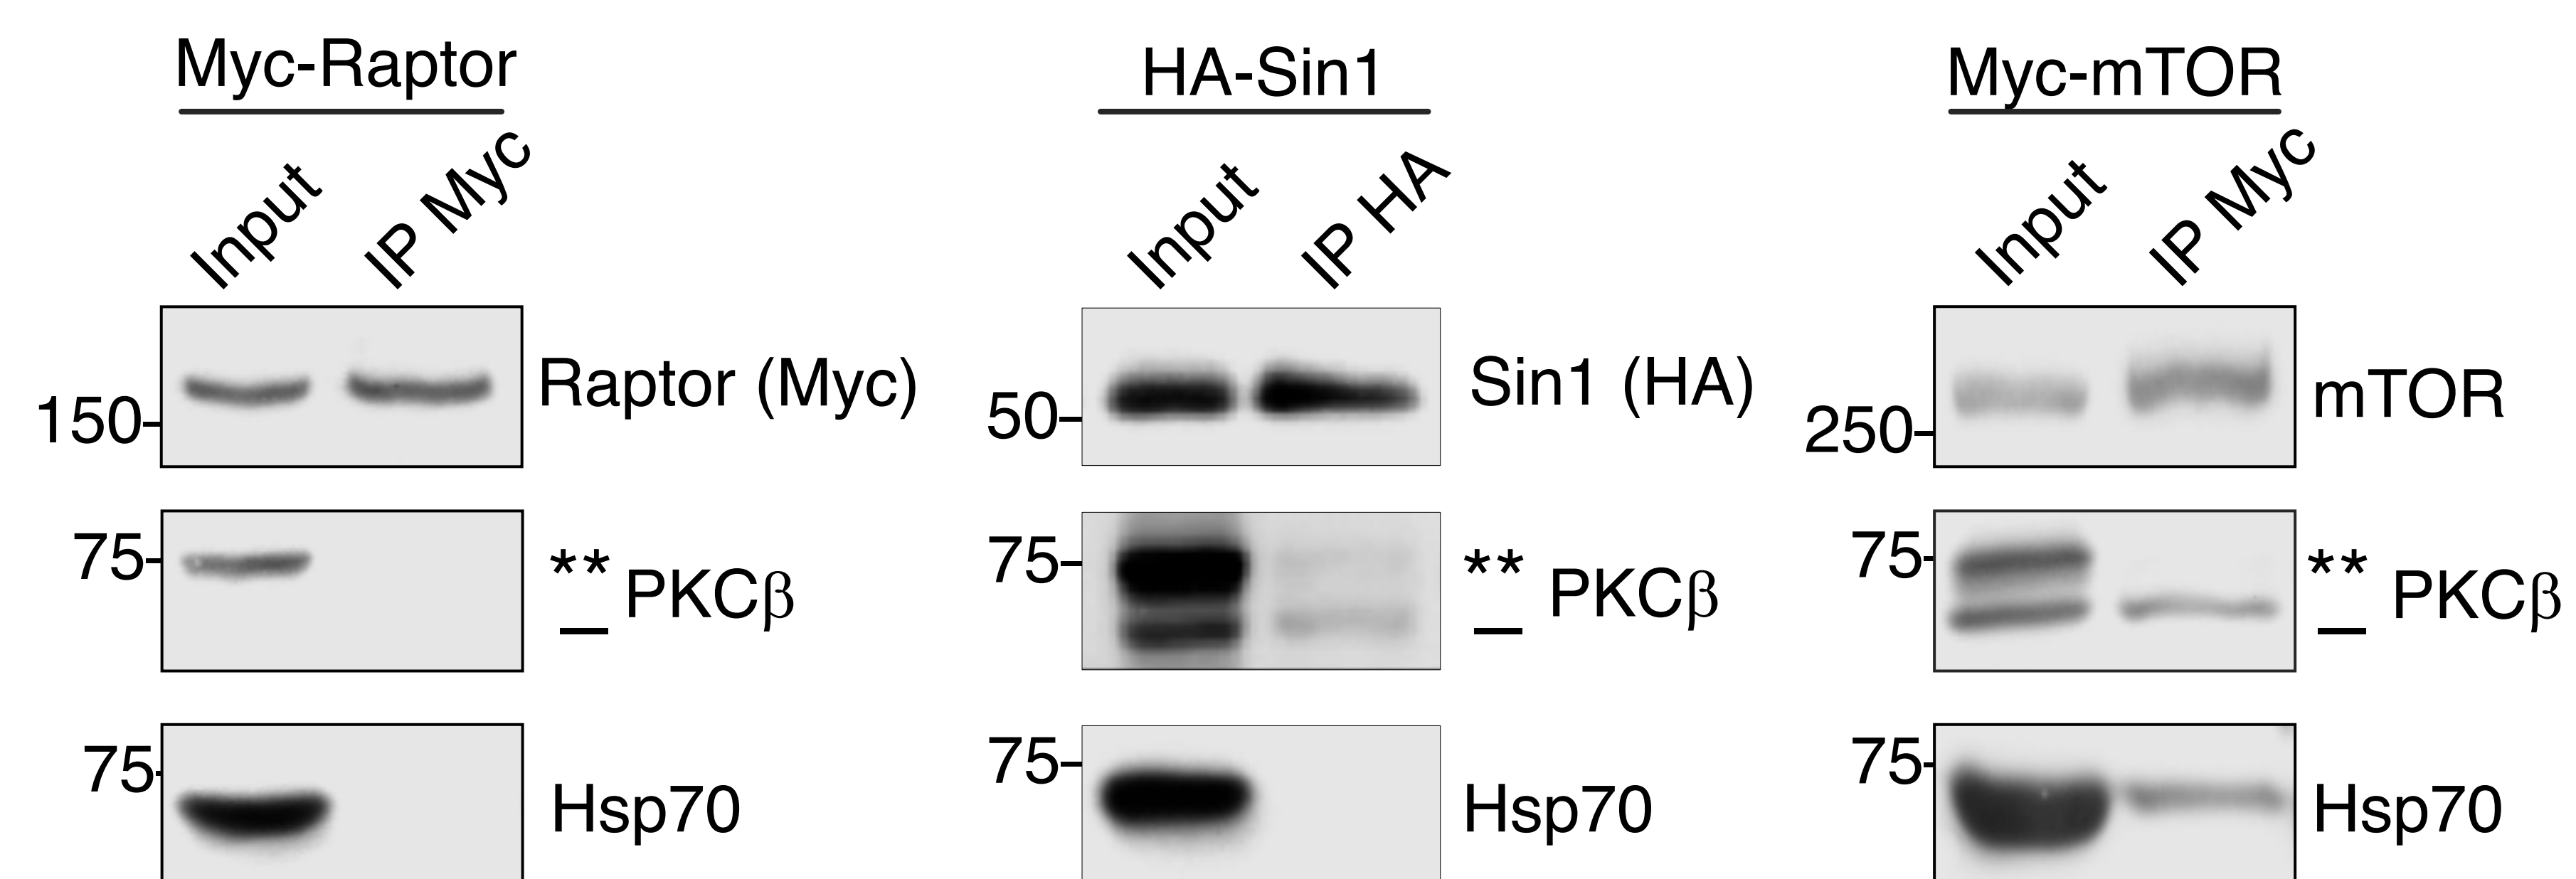**B**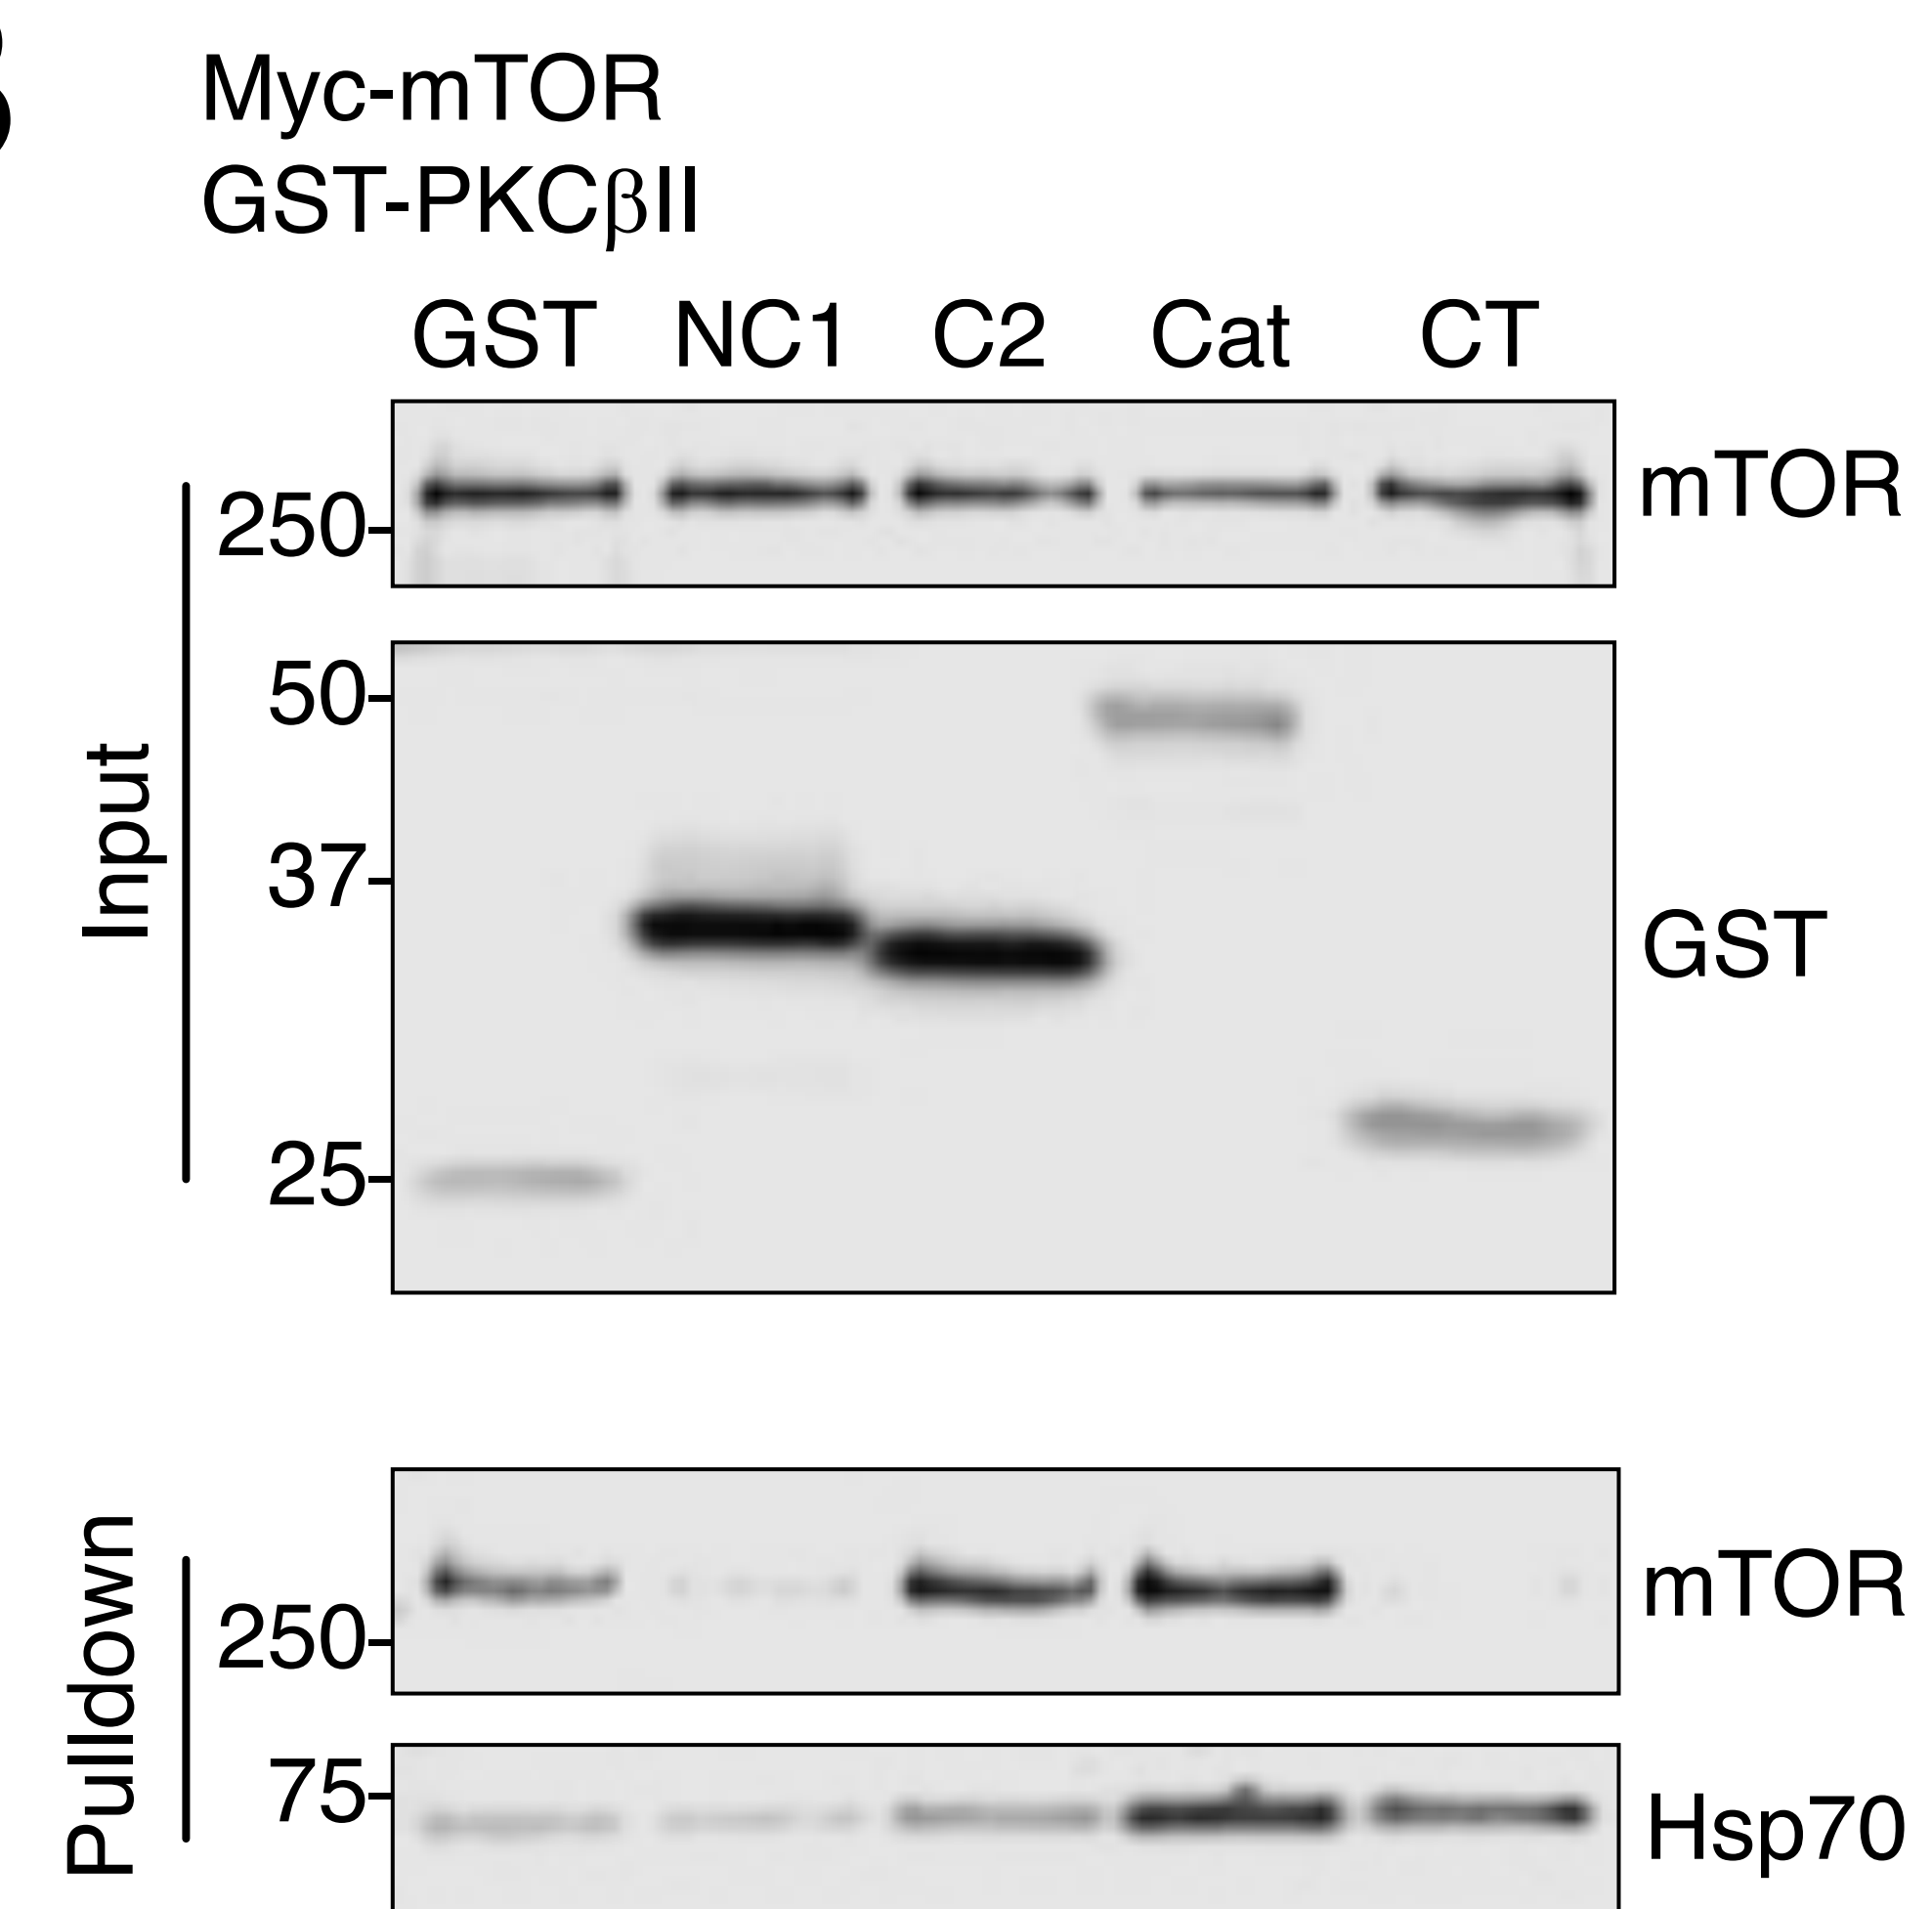**C**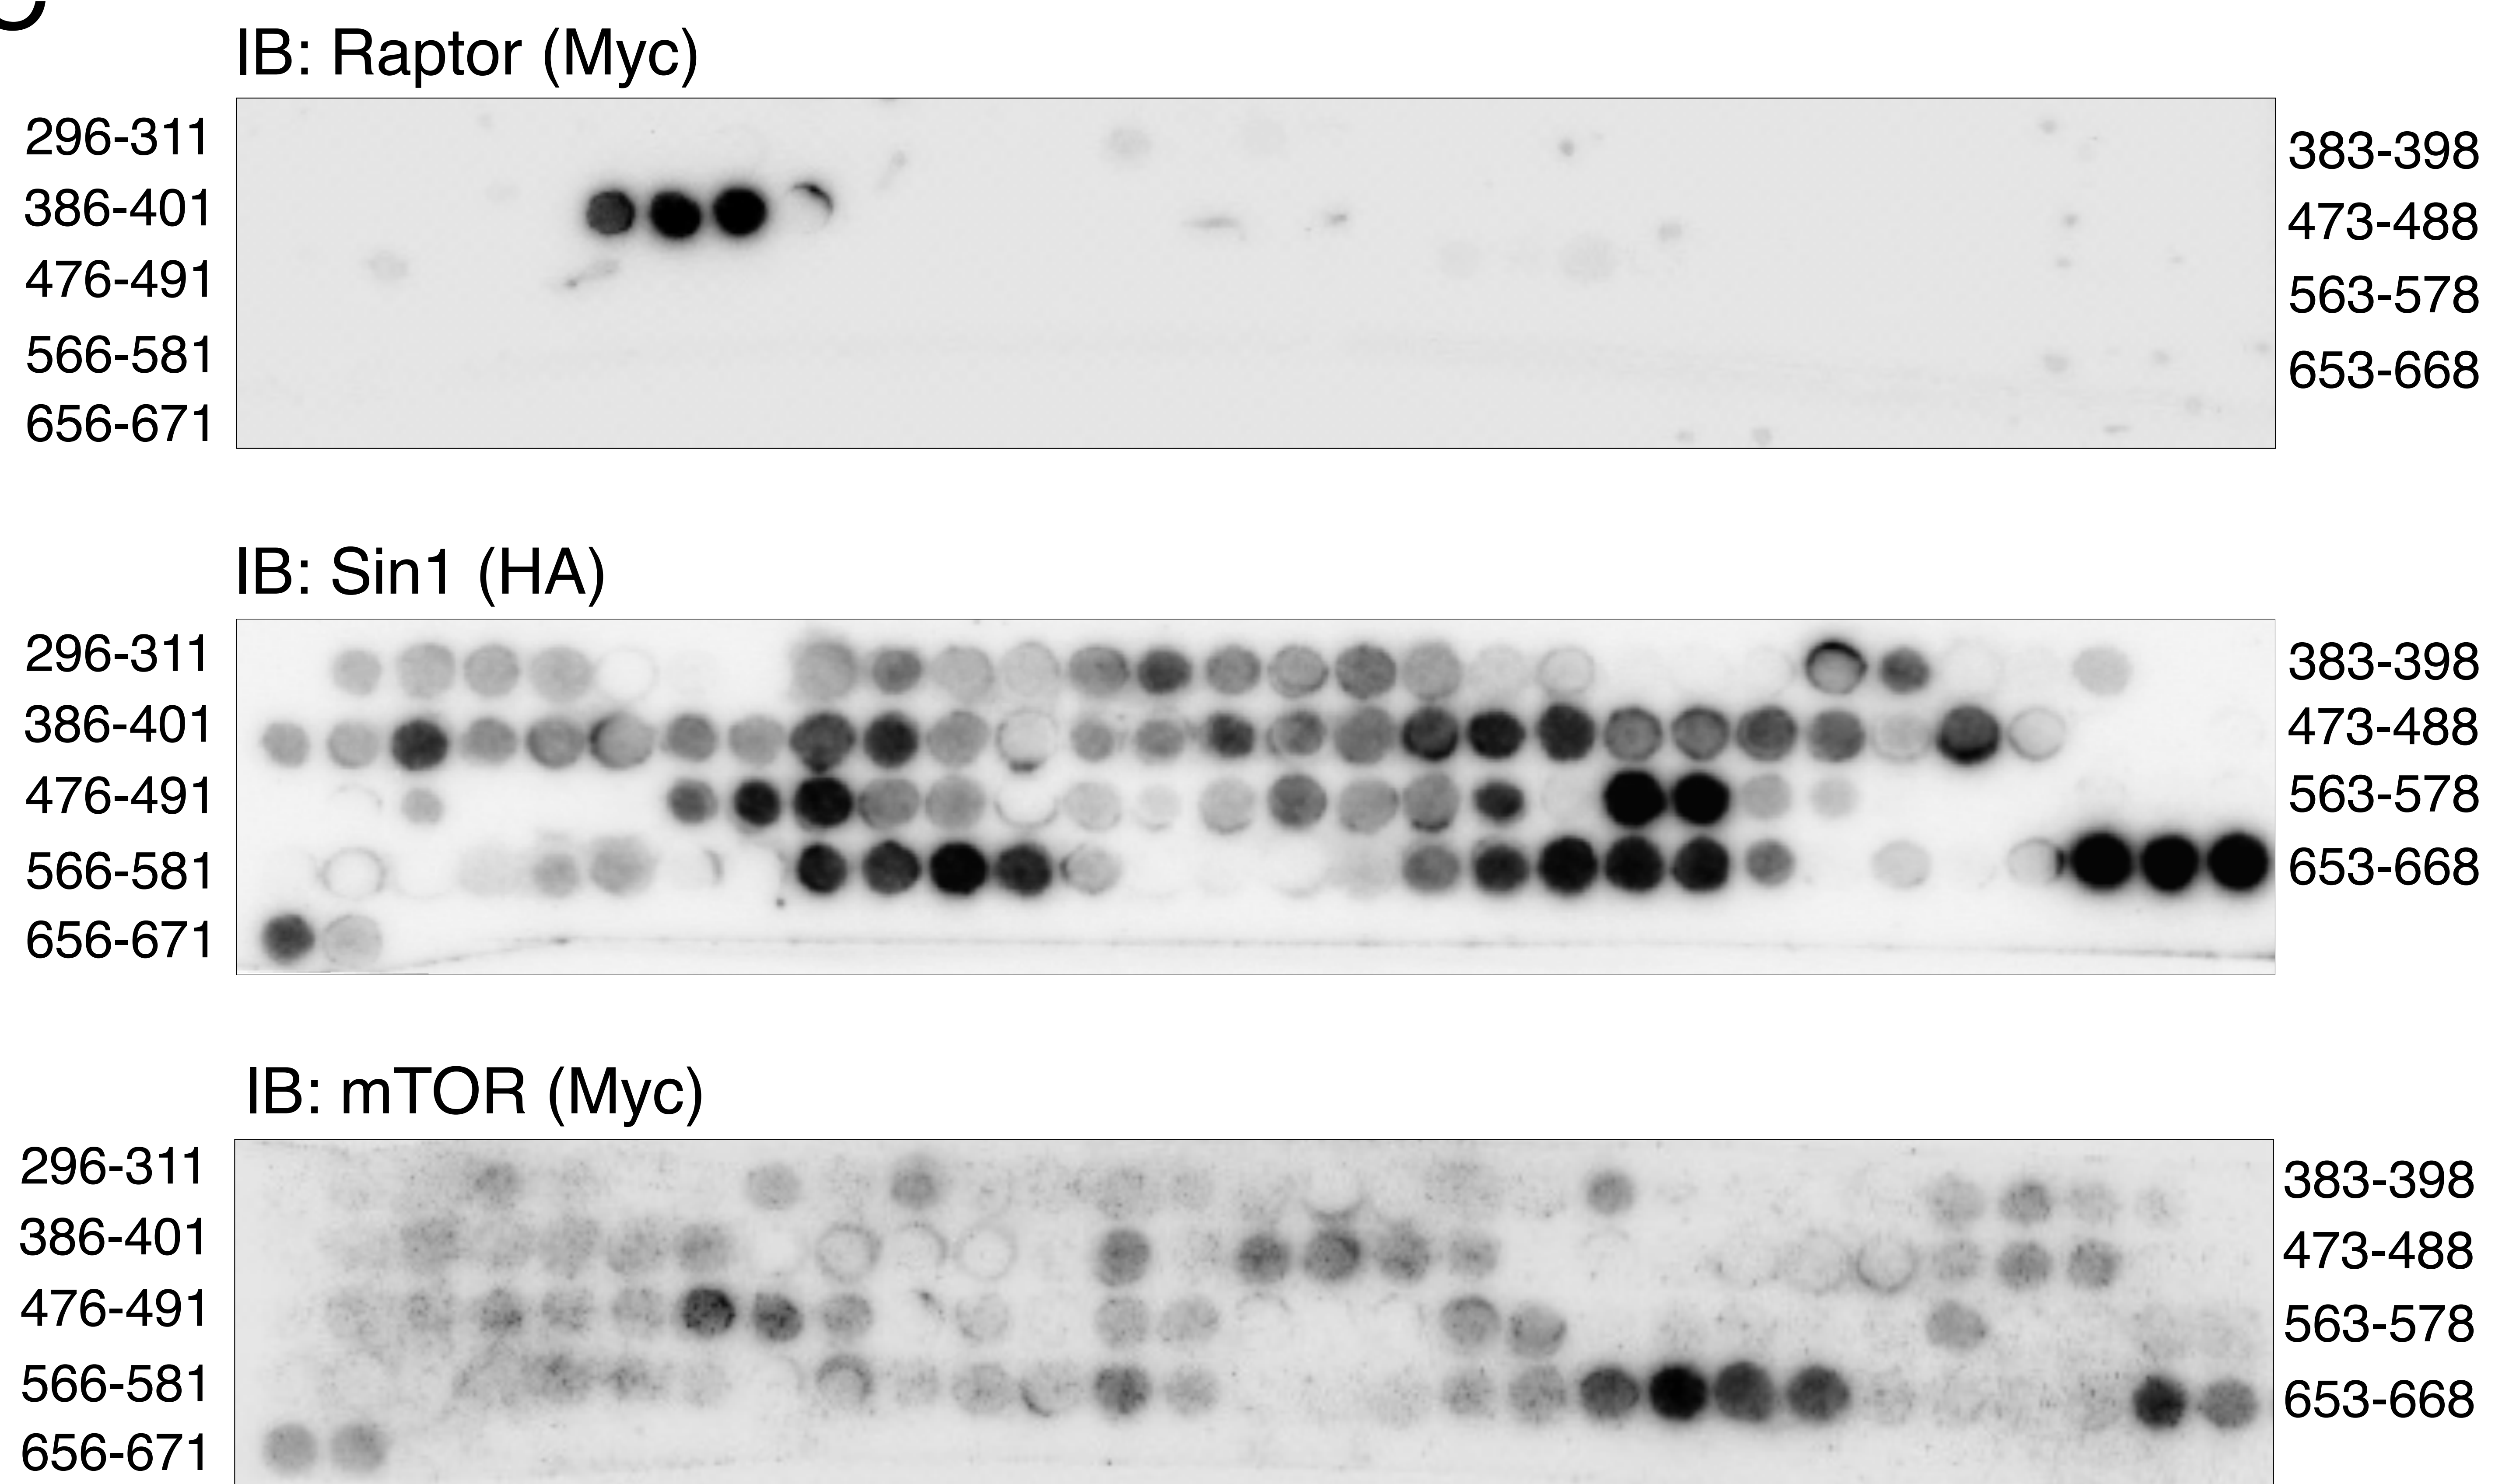

Supplement: NIHMS1708431-supplement-Figure_S2.pdf [file NIHMS1708431-supplement-Figure_S2.pdf]

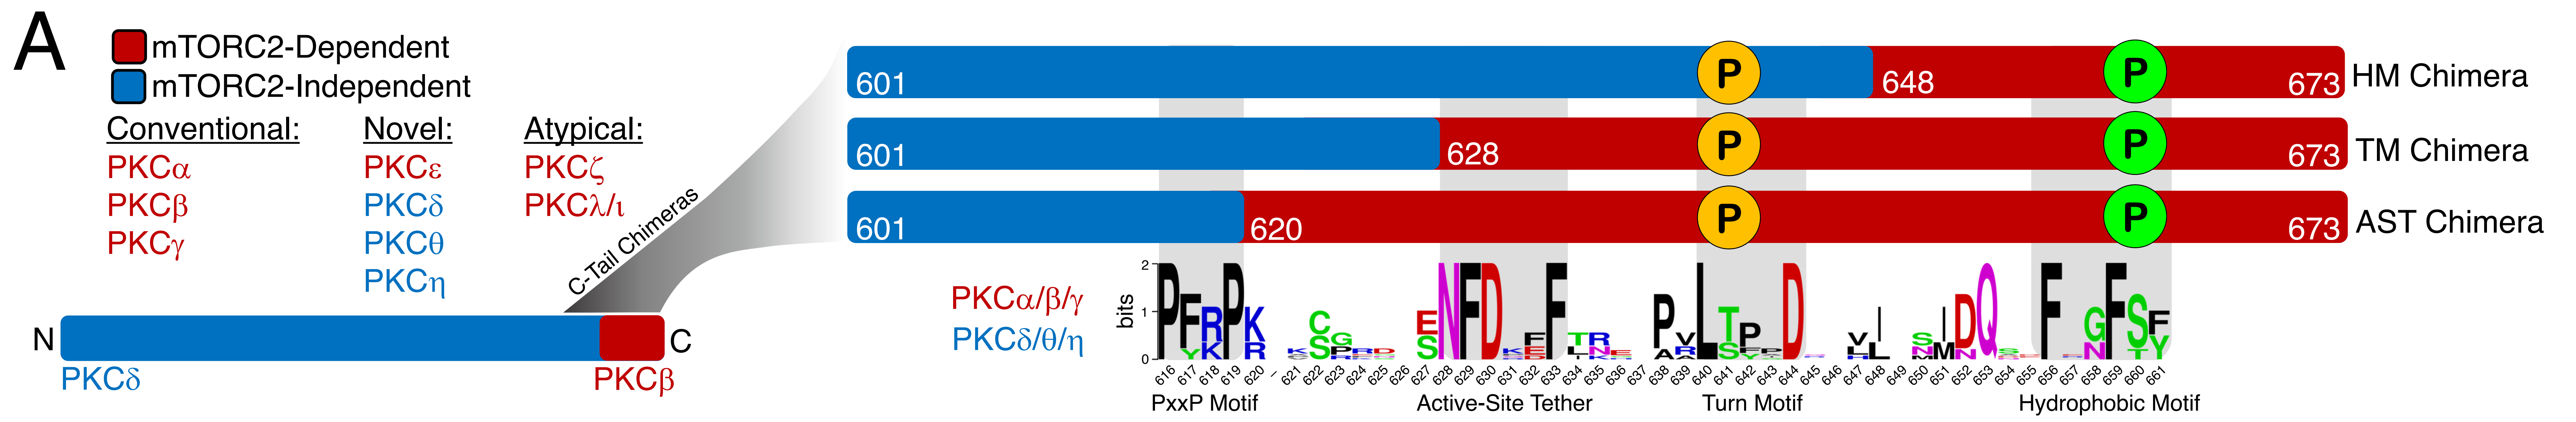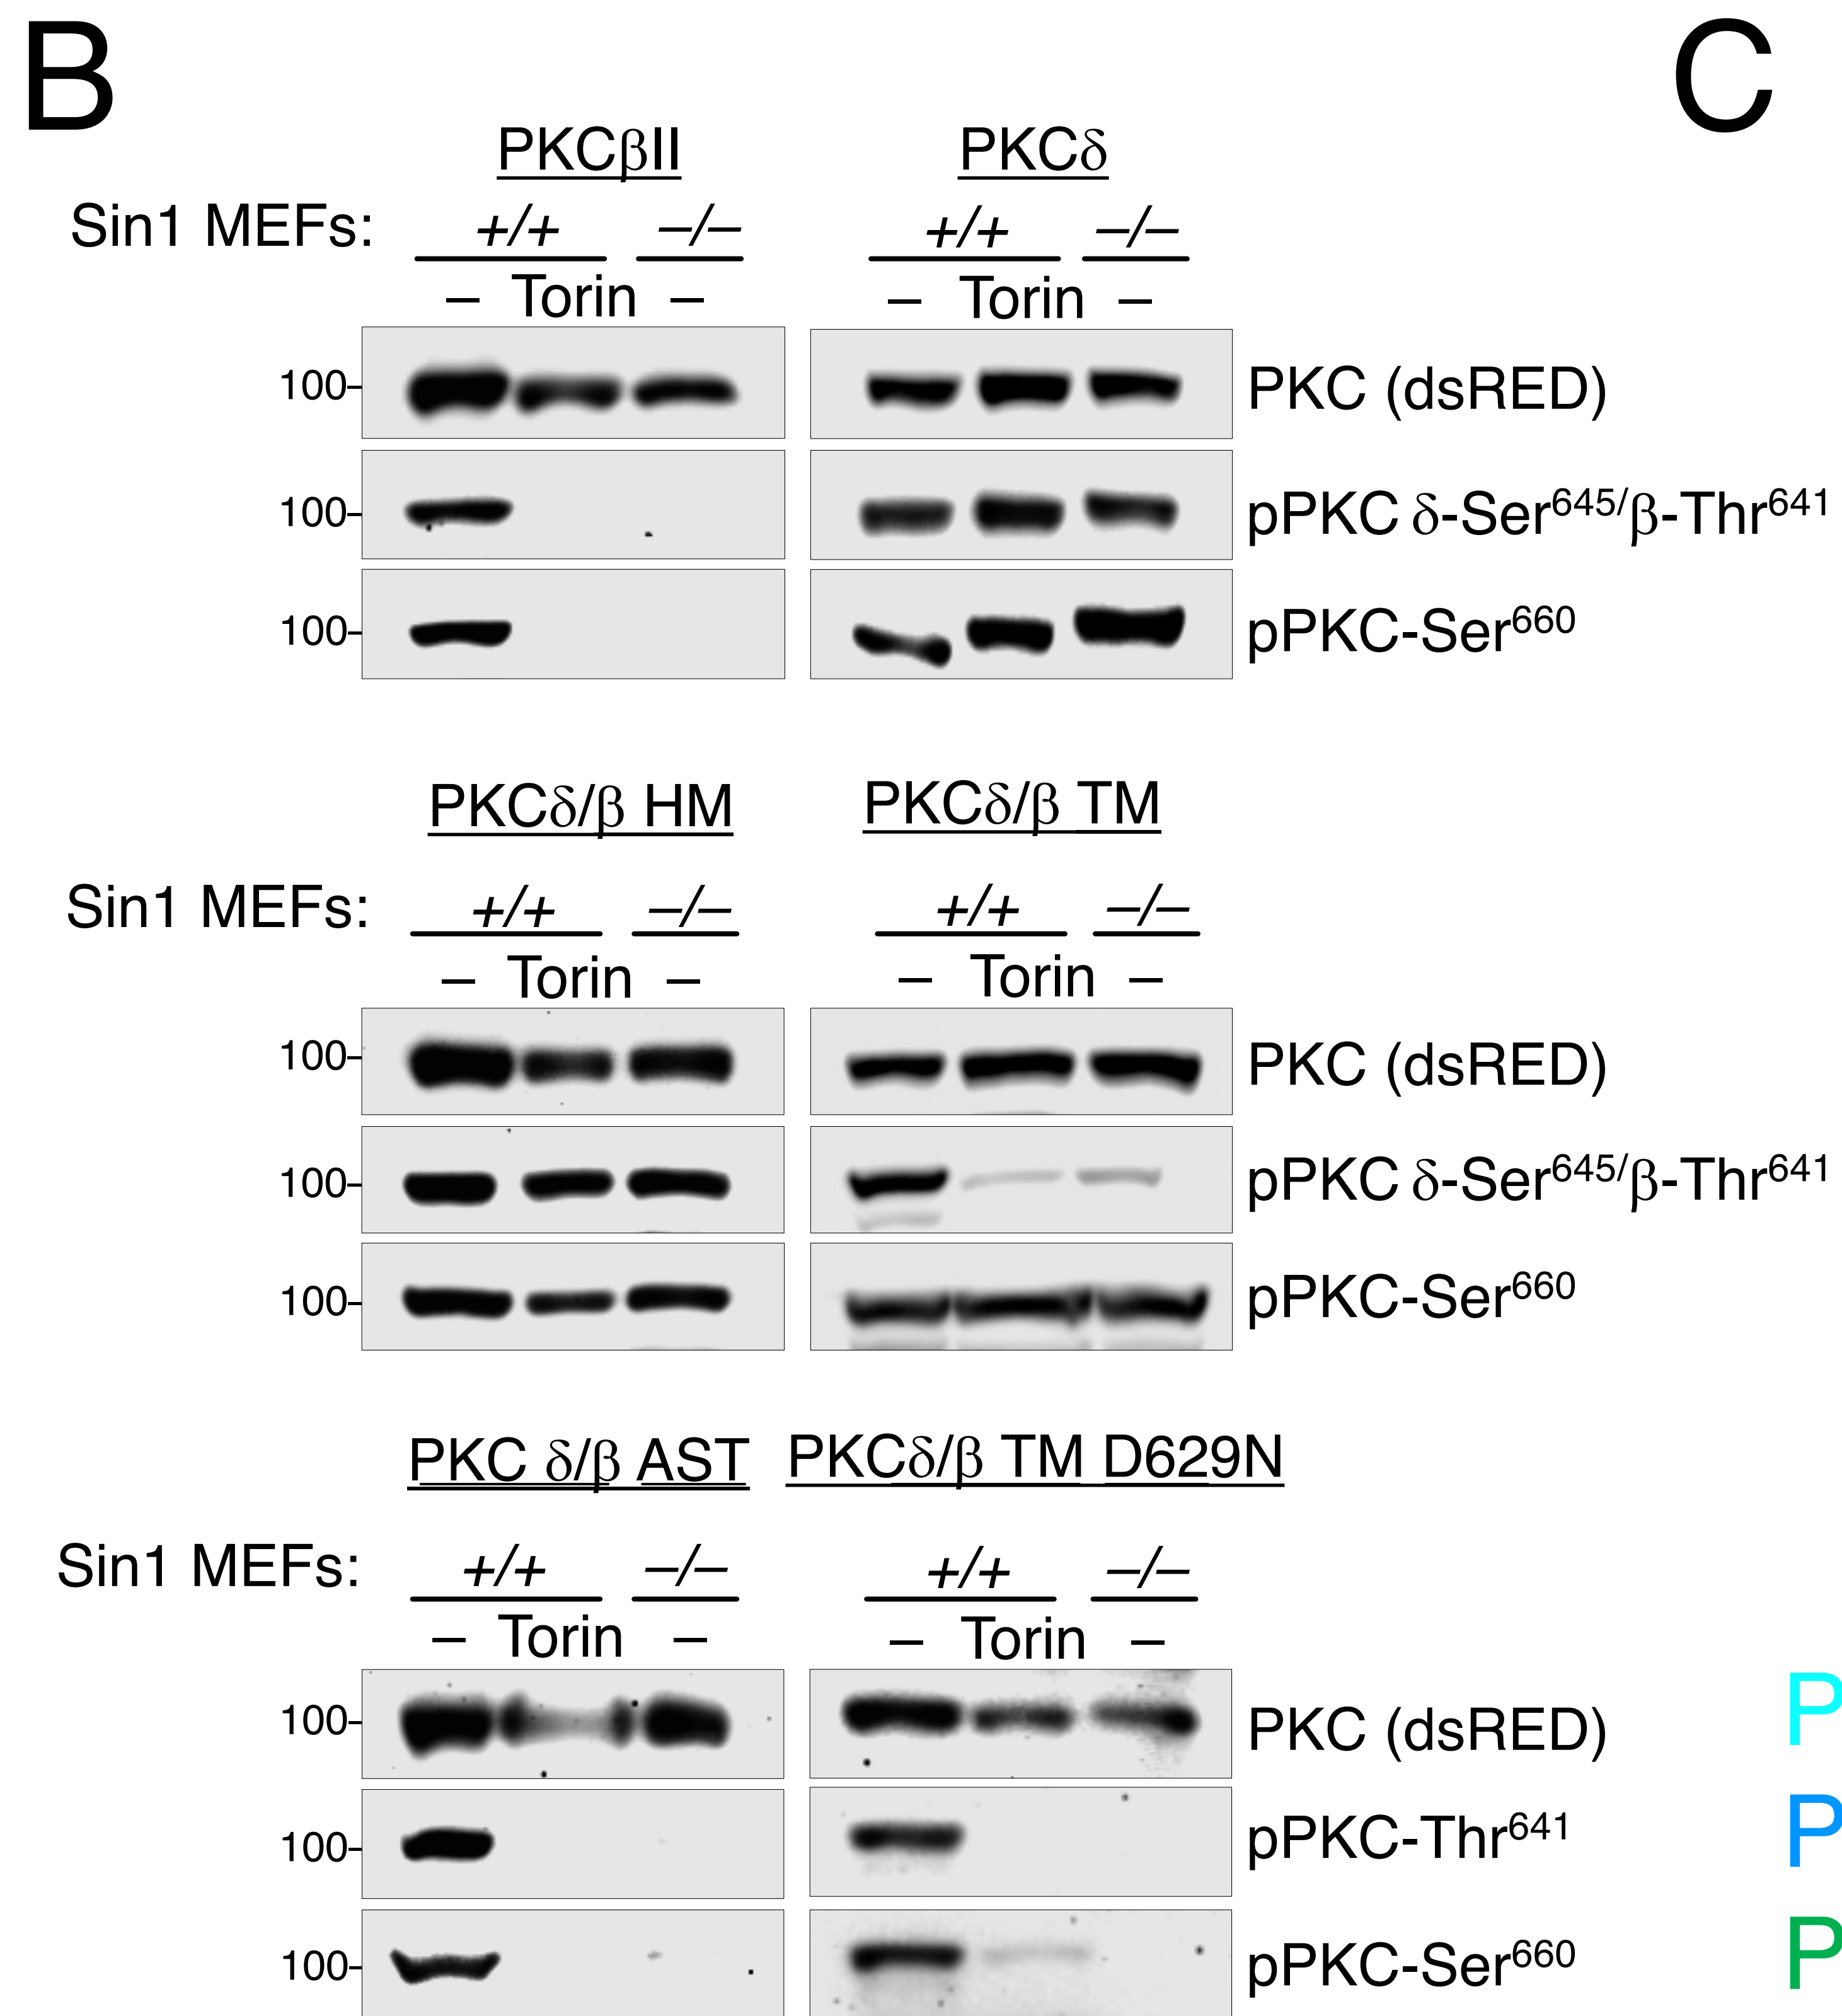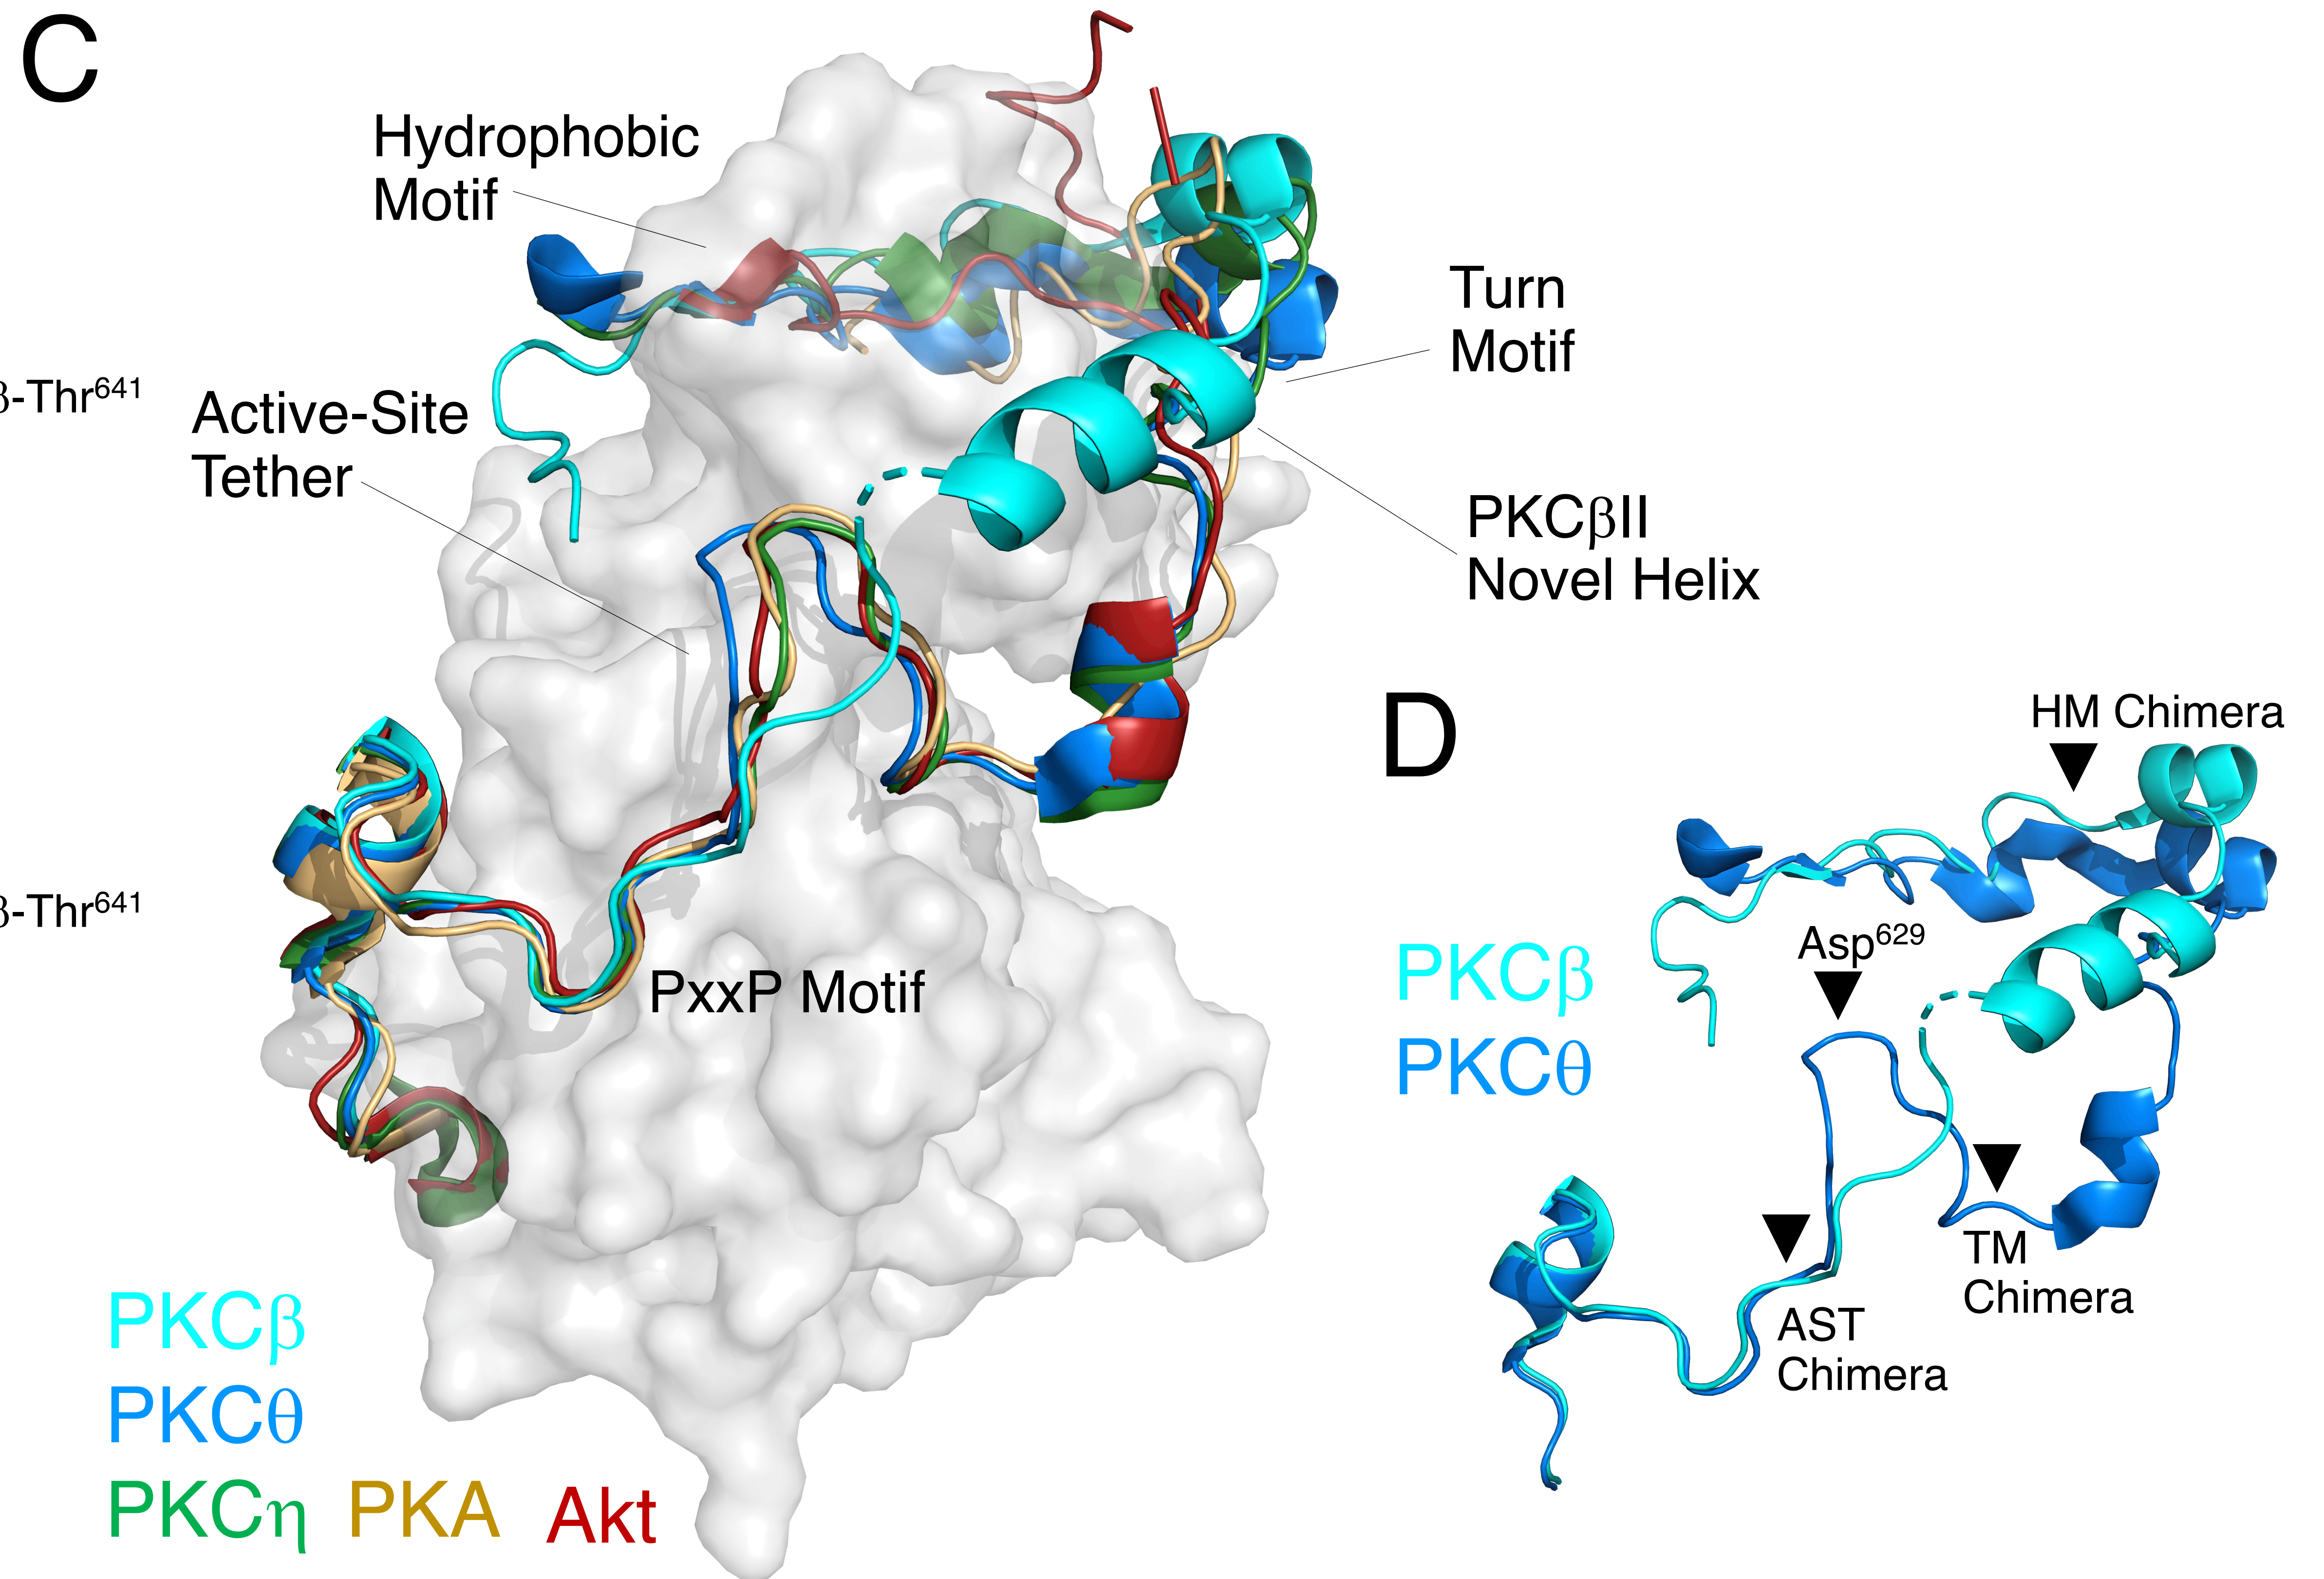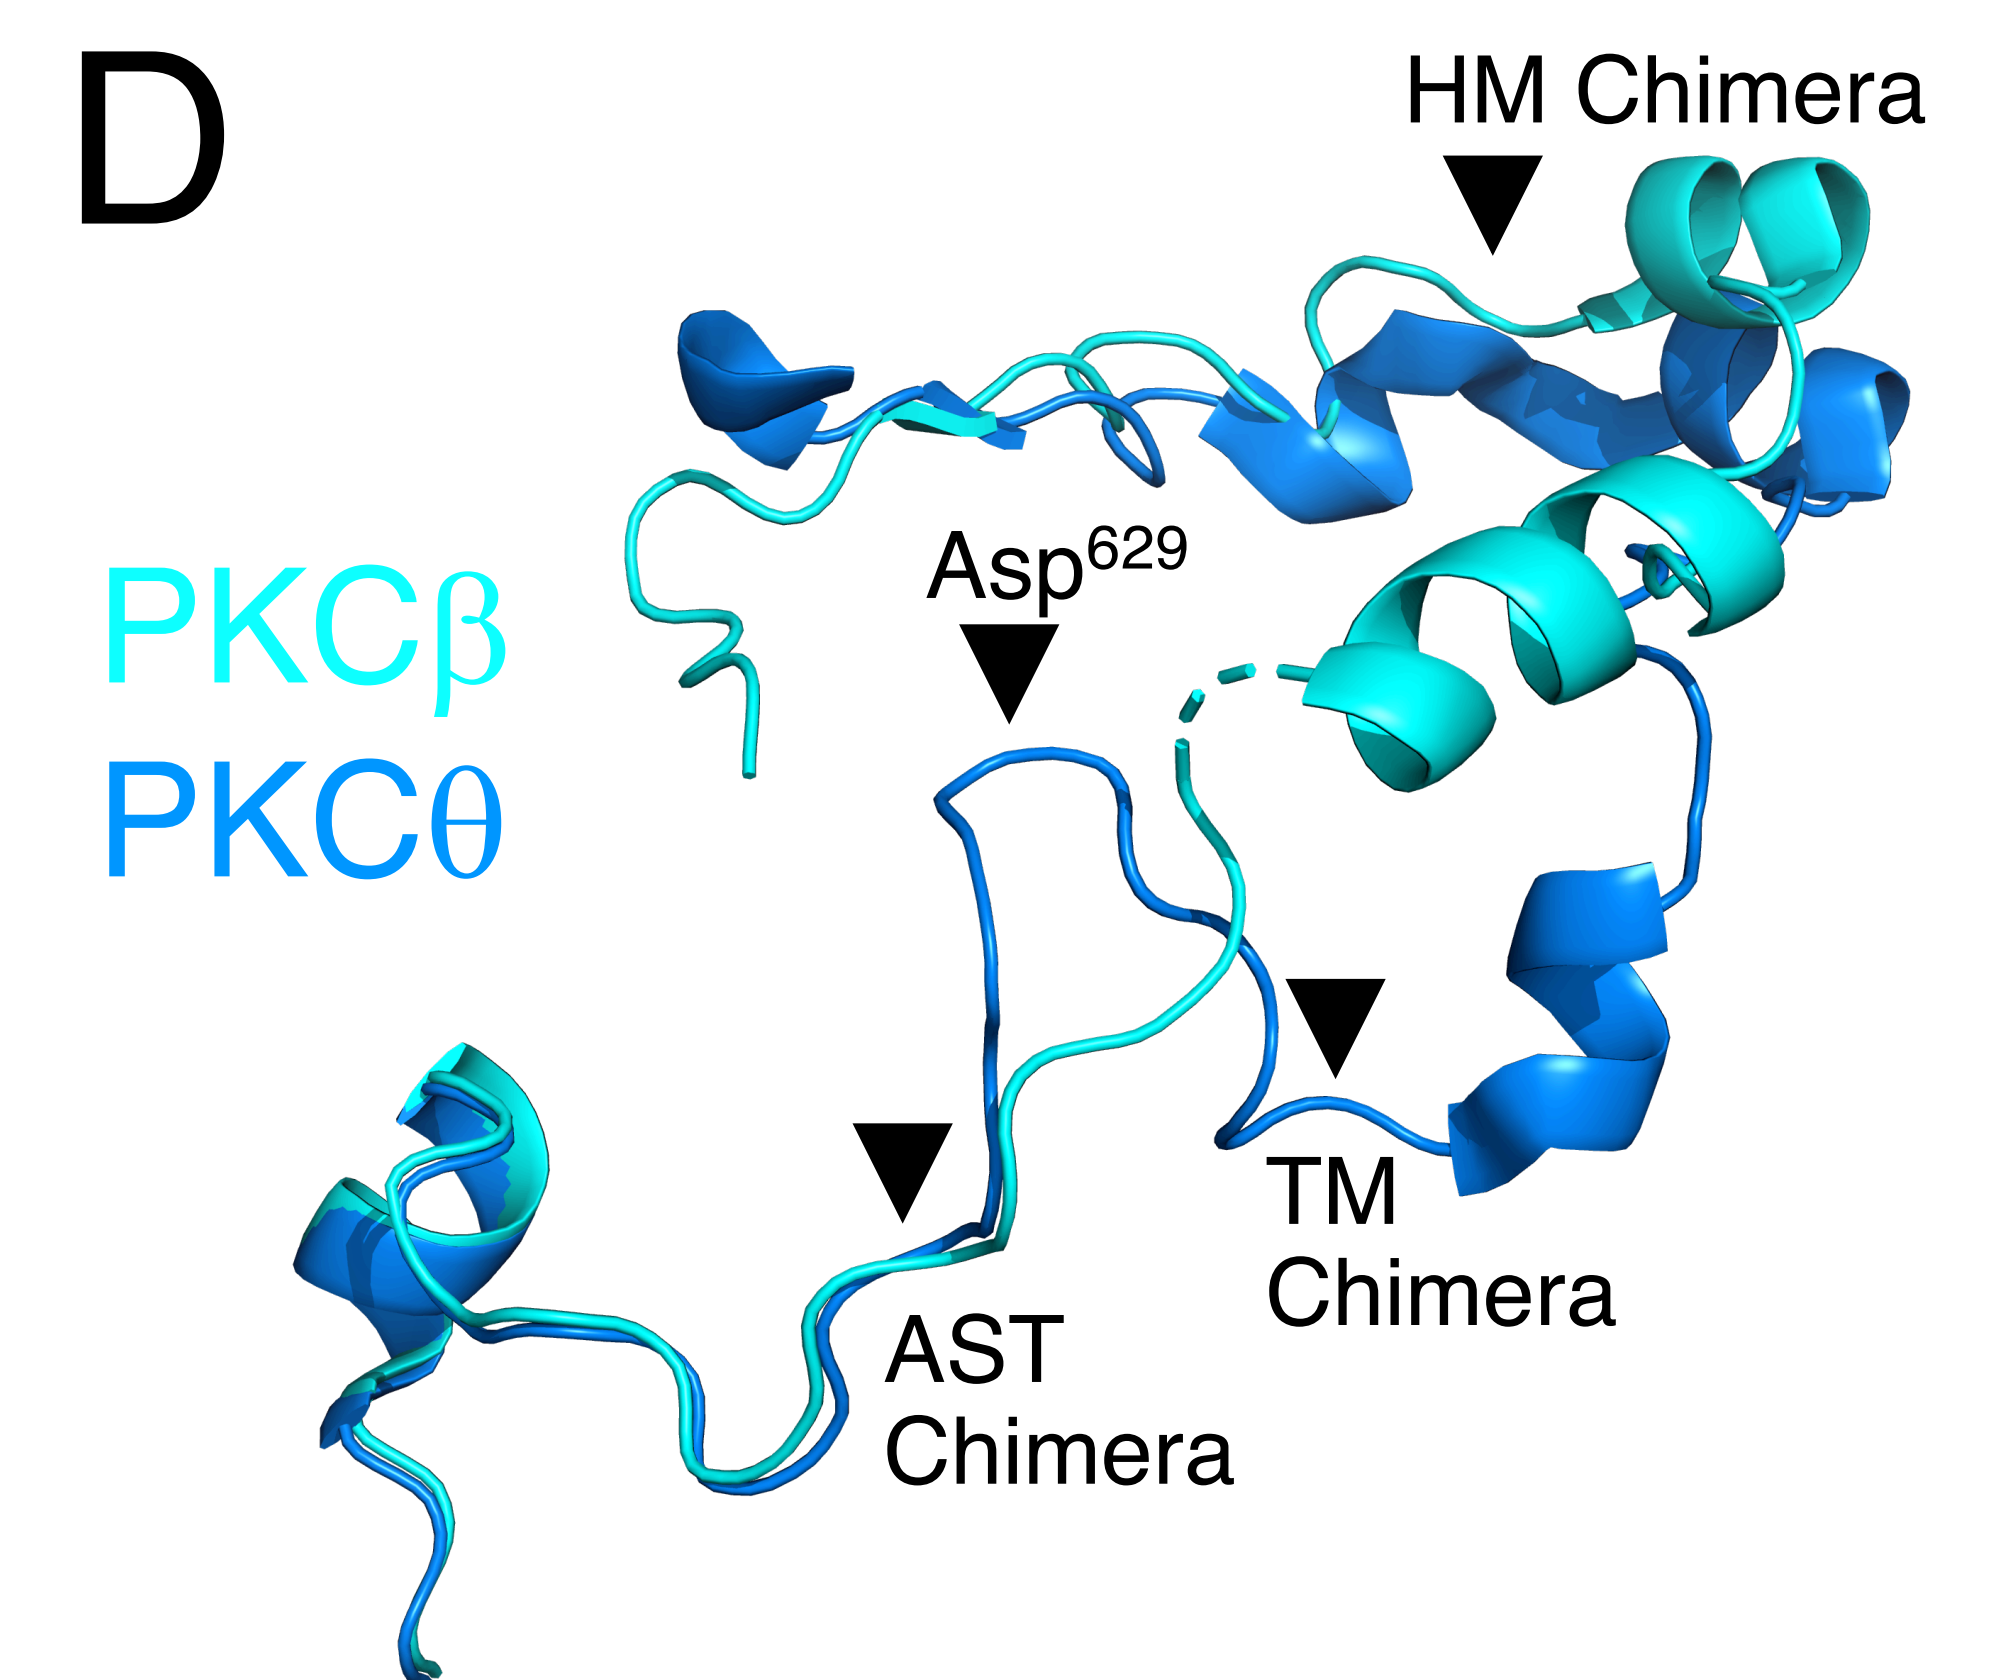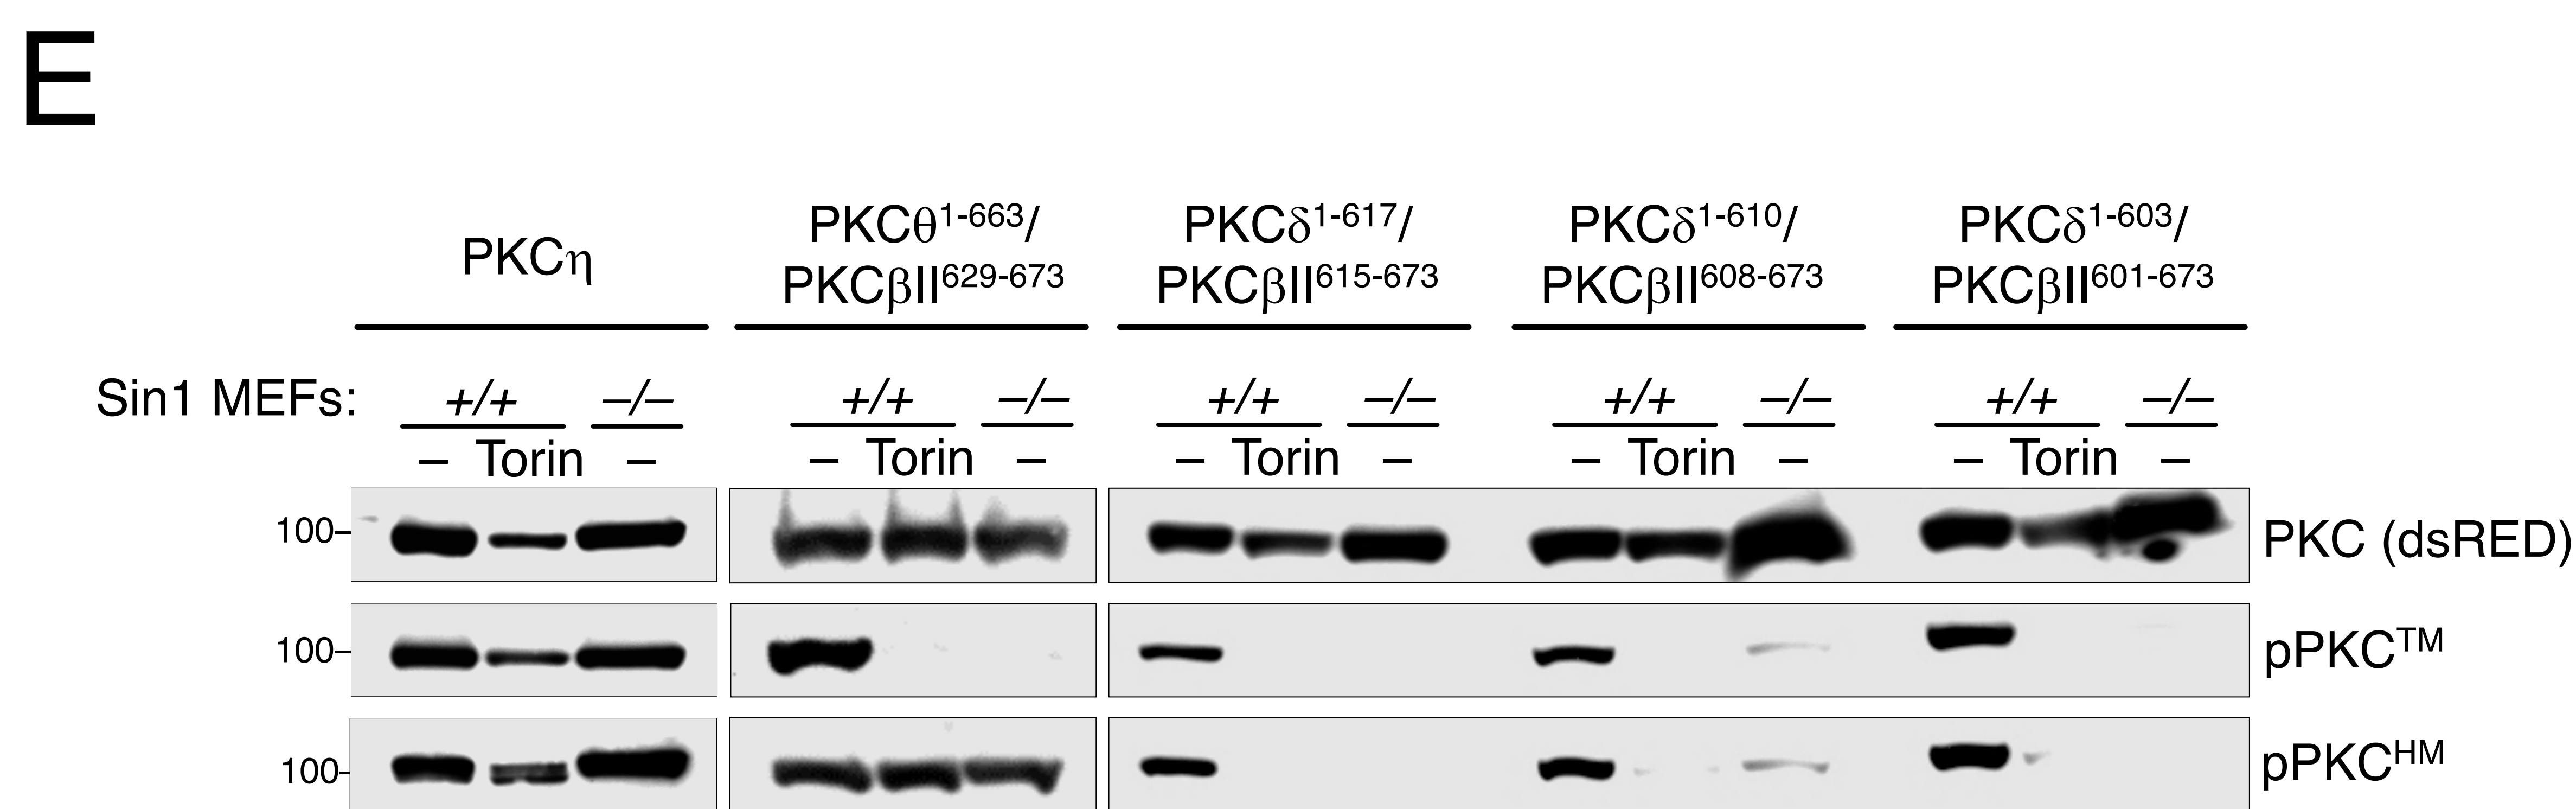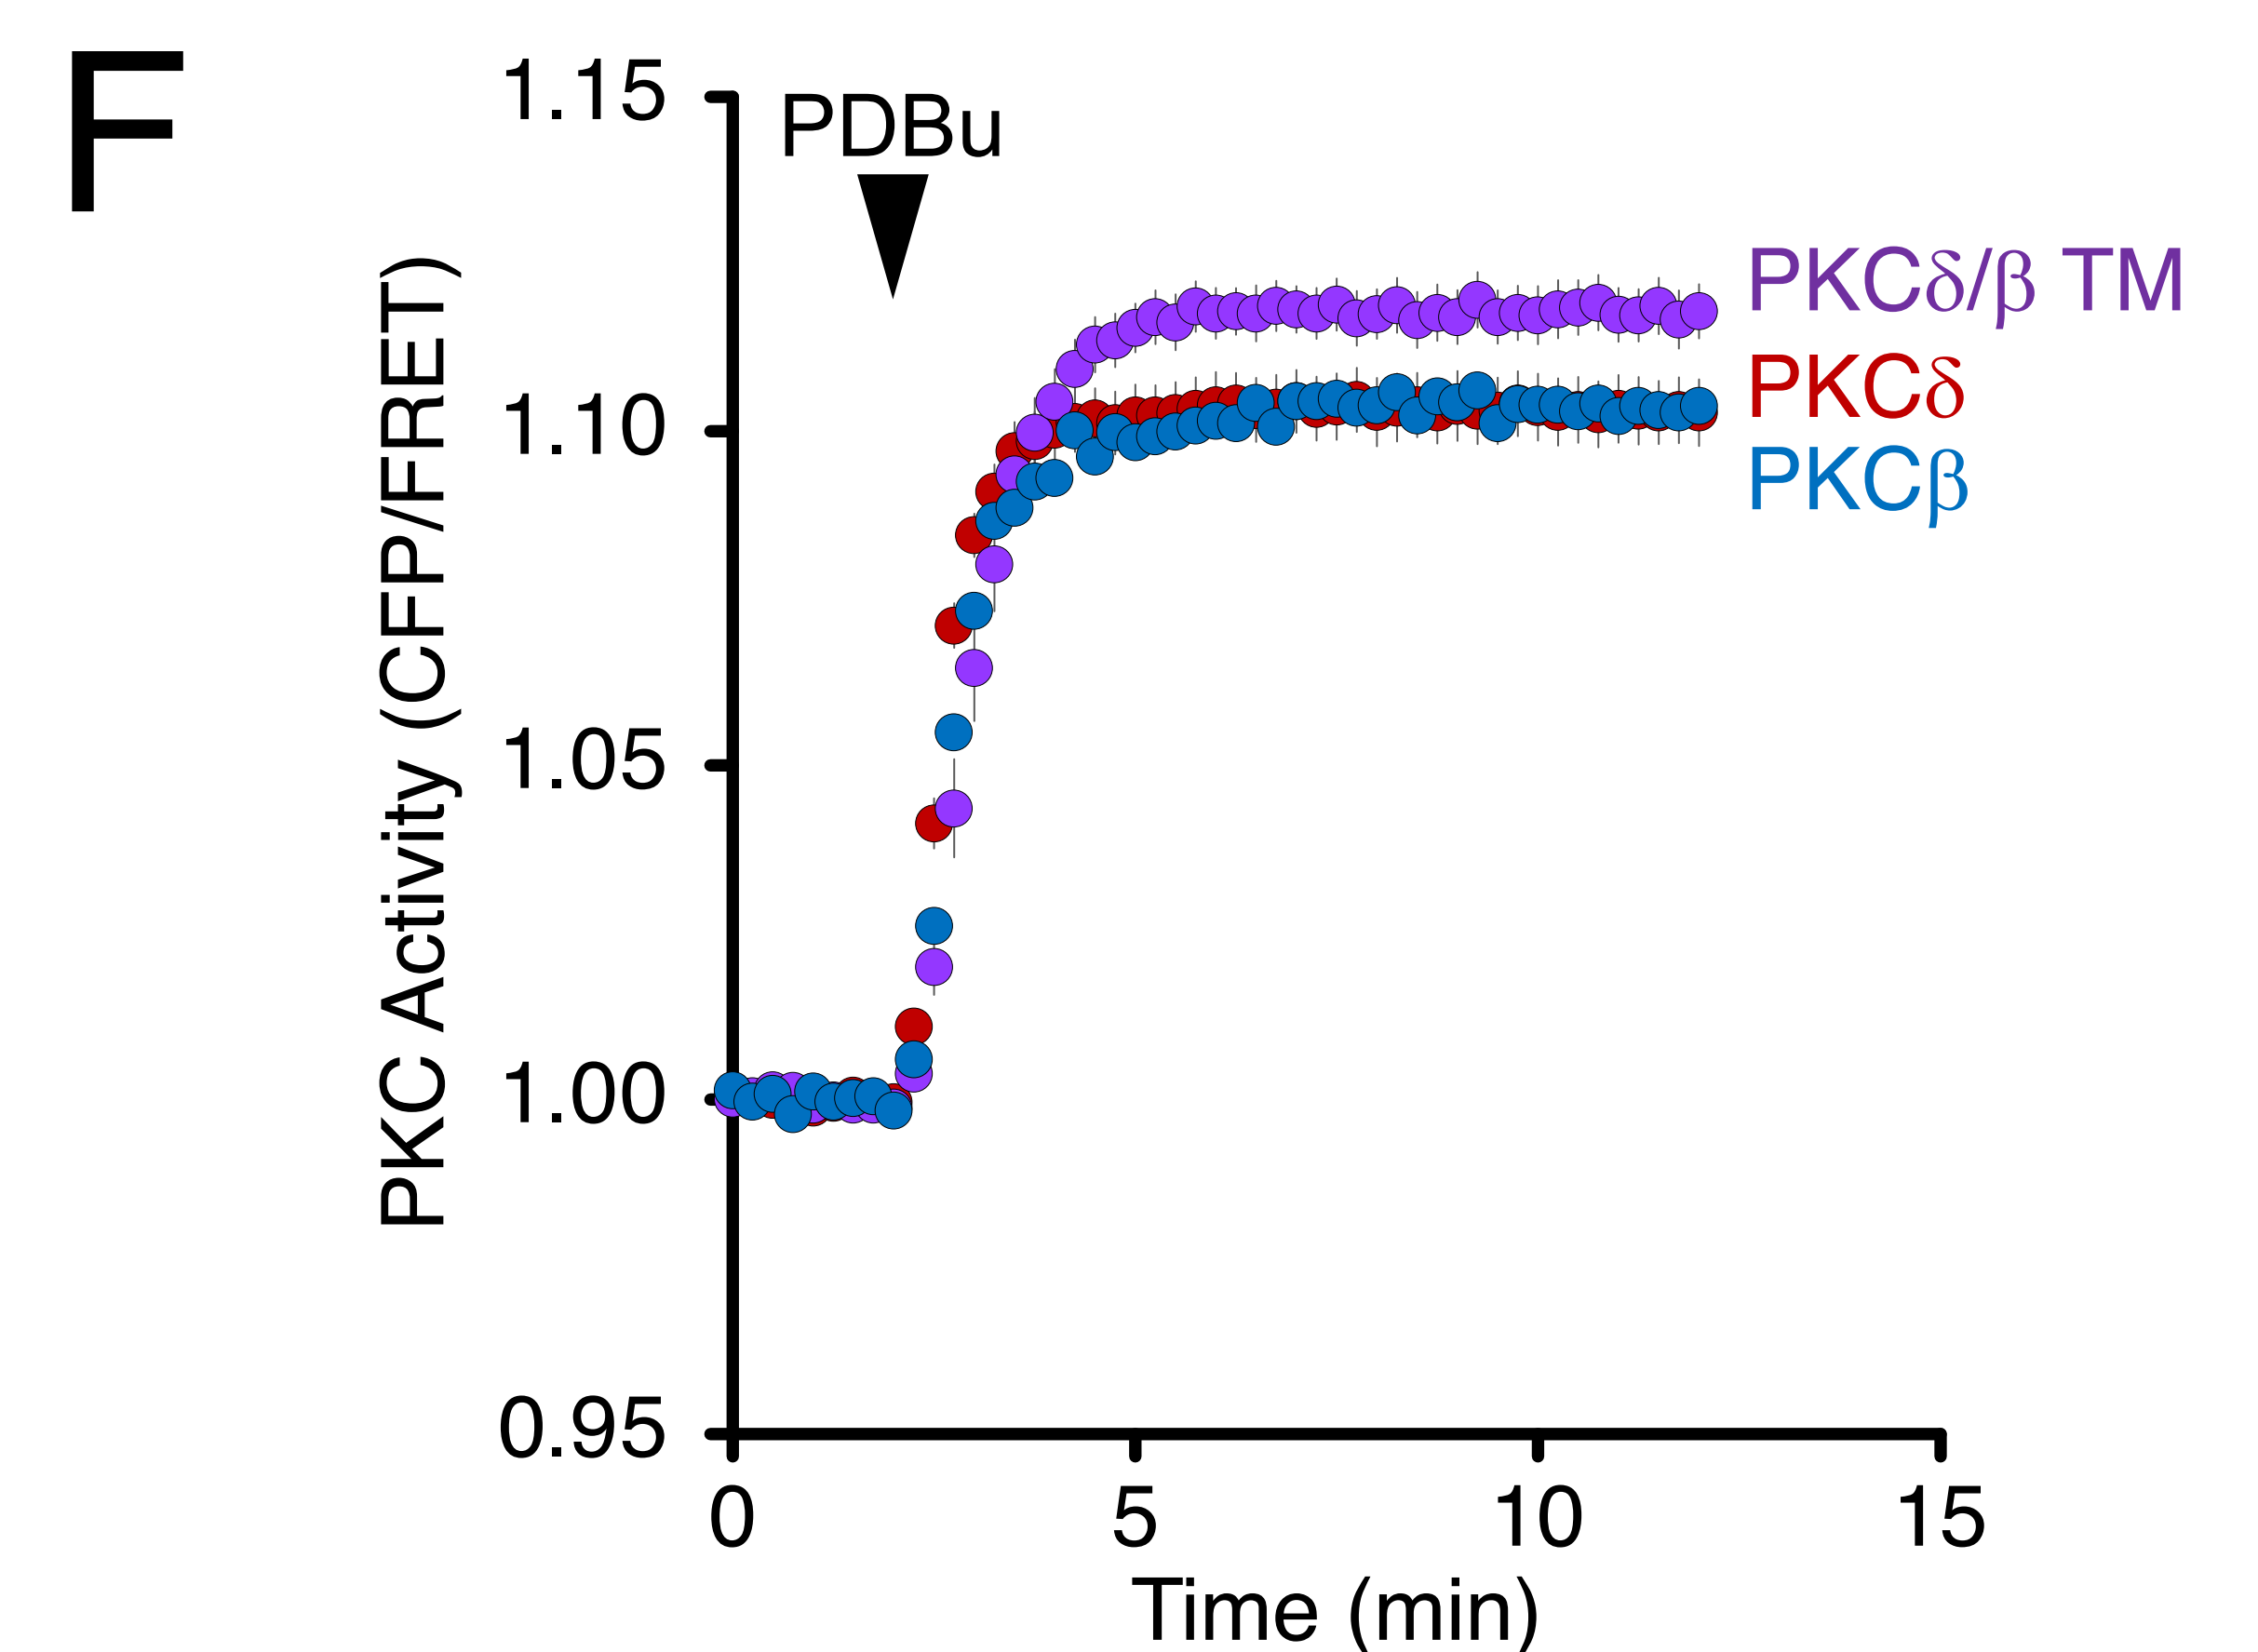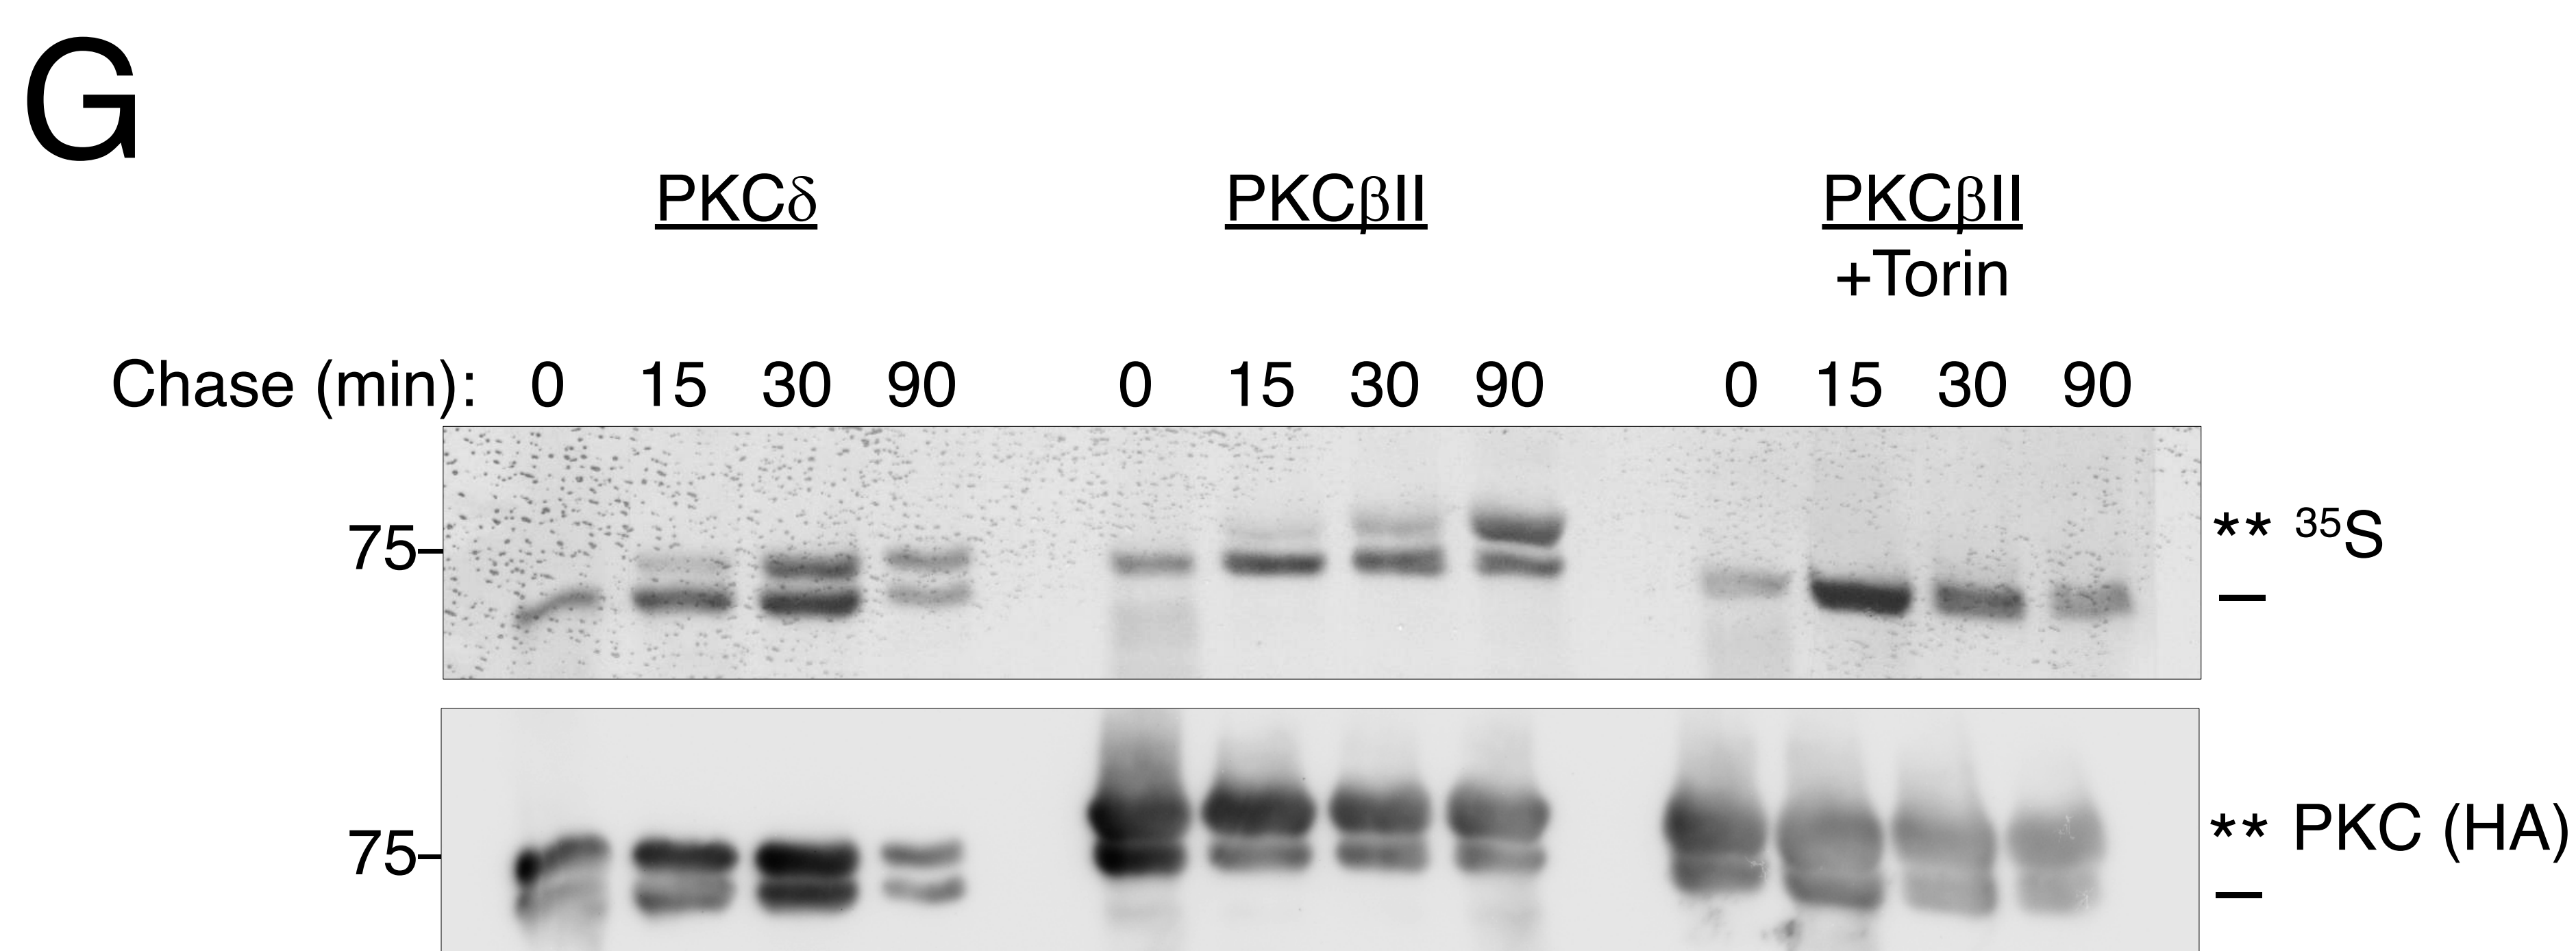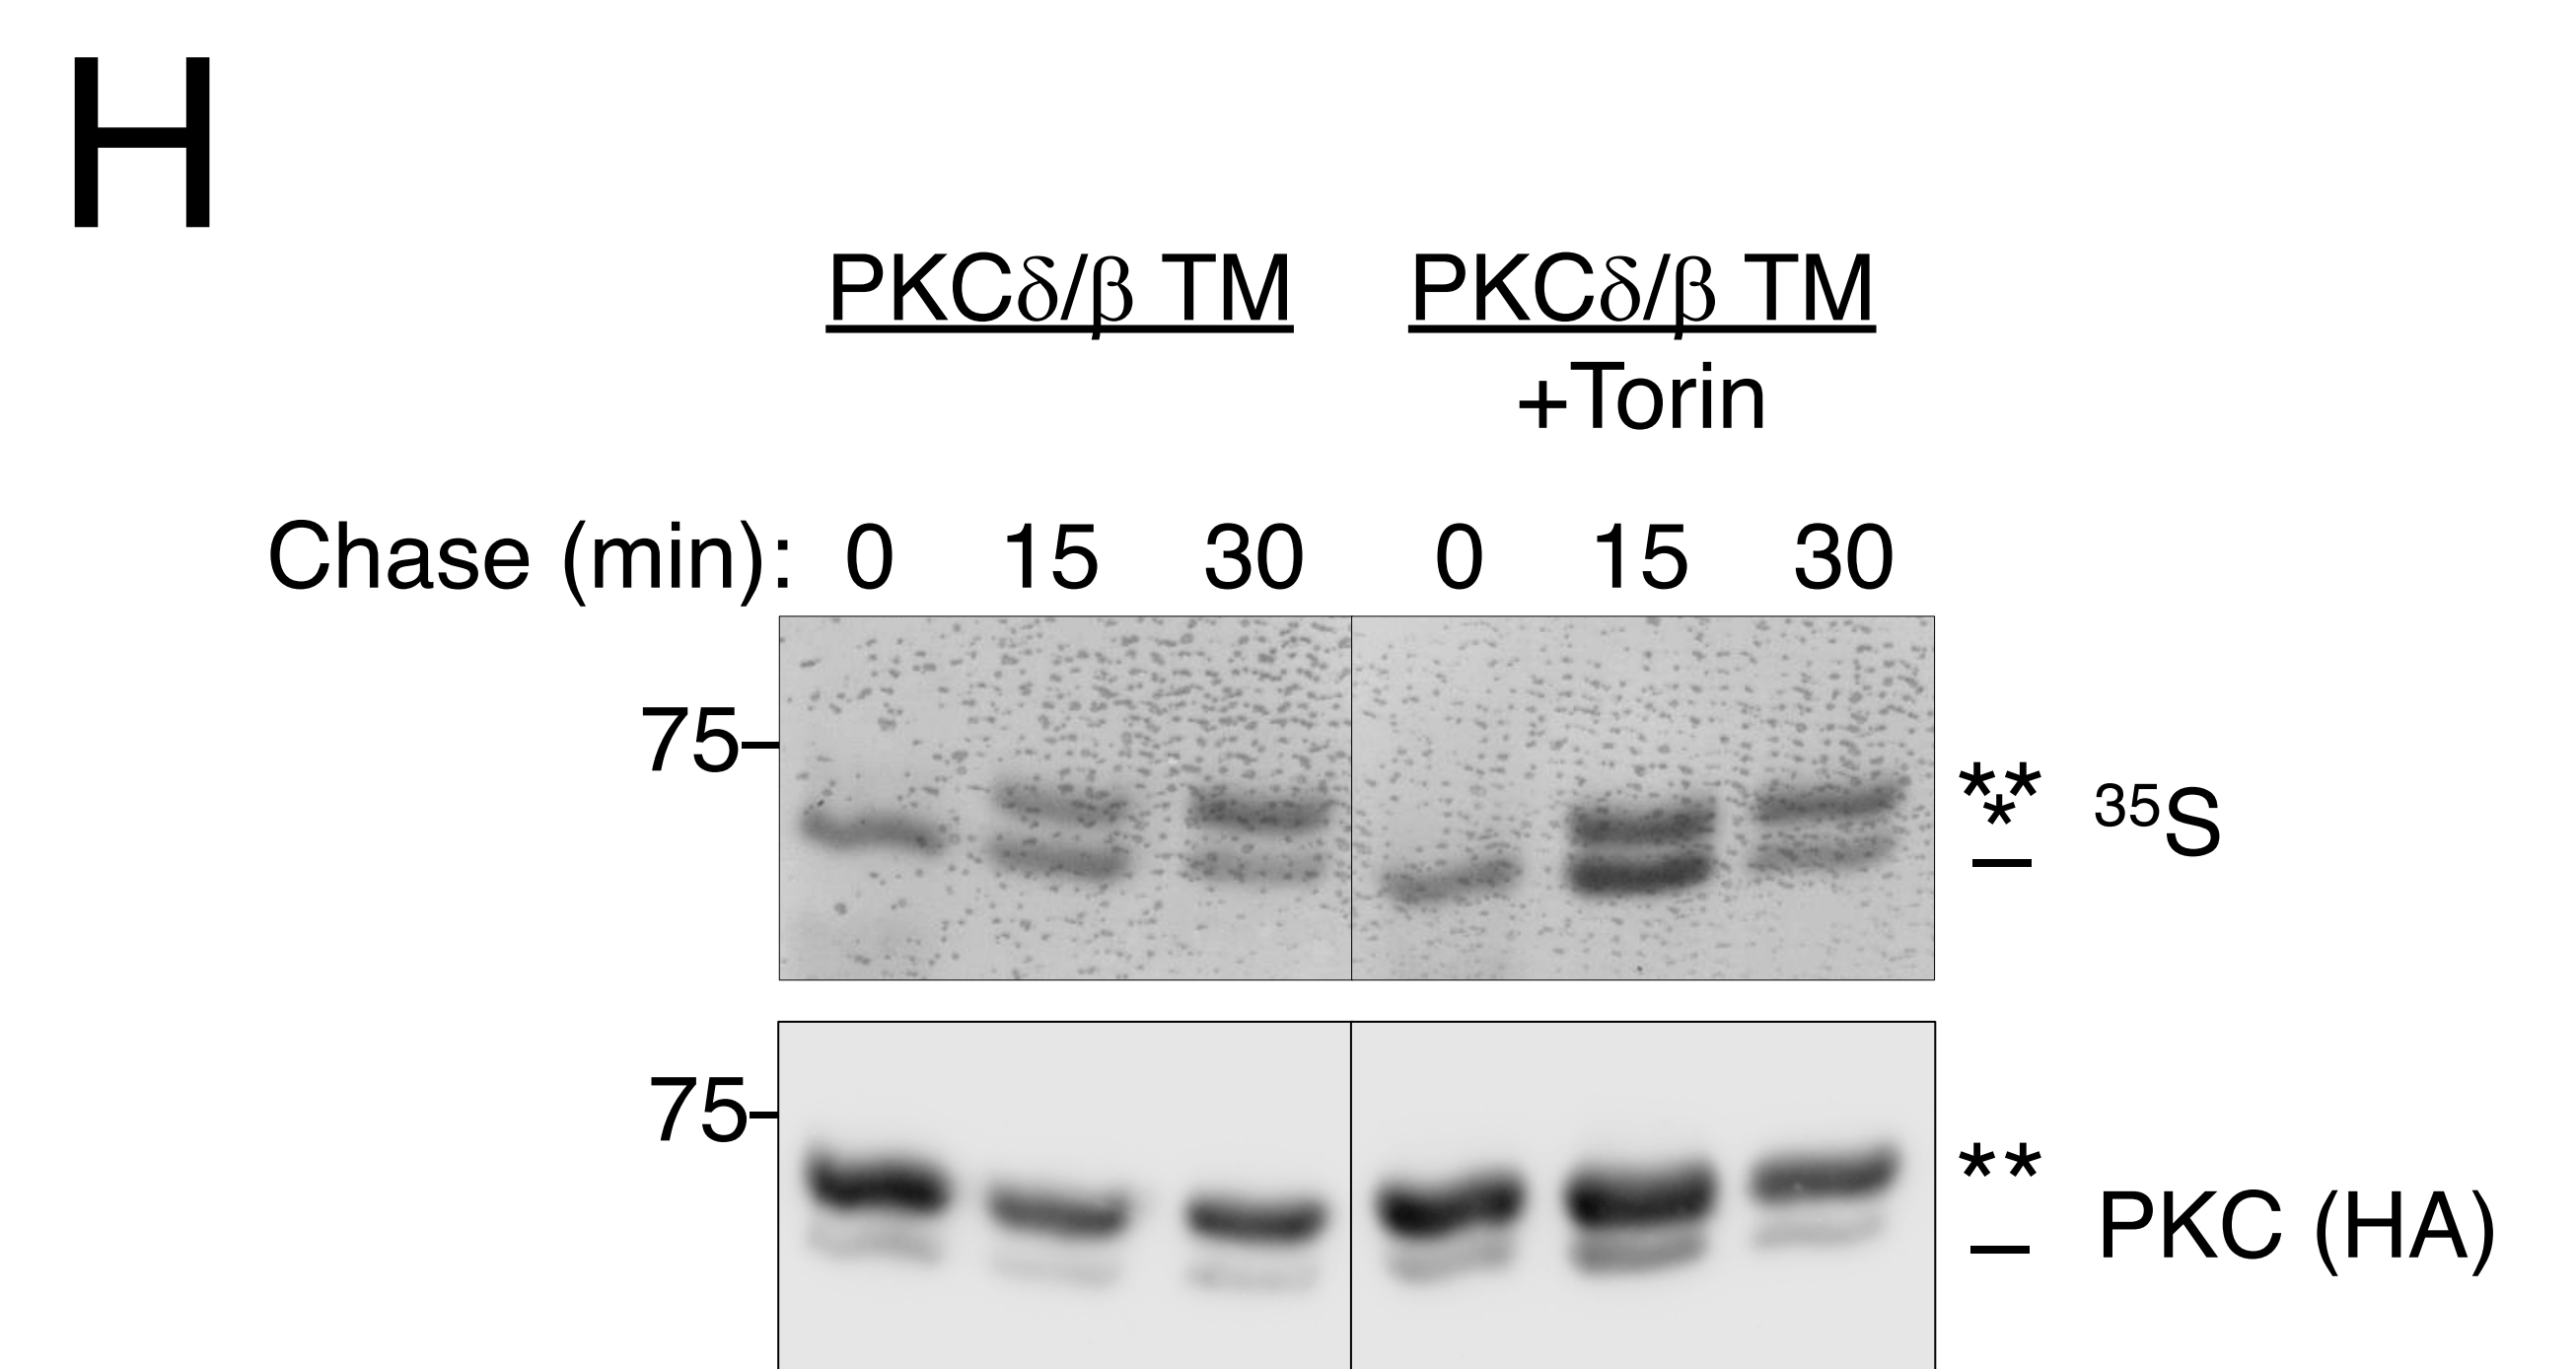

Supplement: NIHMS1708431-supplement-Figure_S3.pdf [file NIHMS1708431-supplement-Figure_S3.pdf]

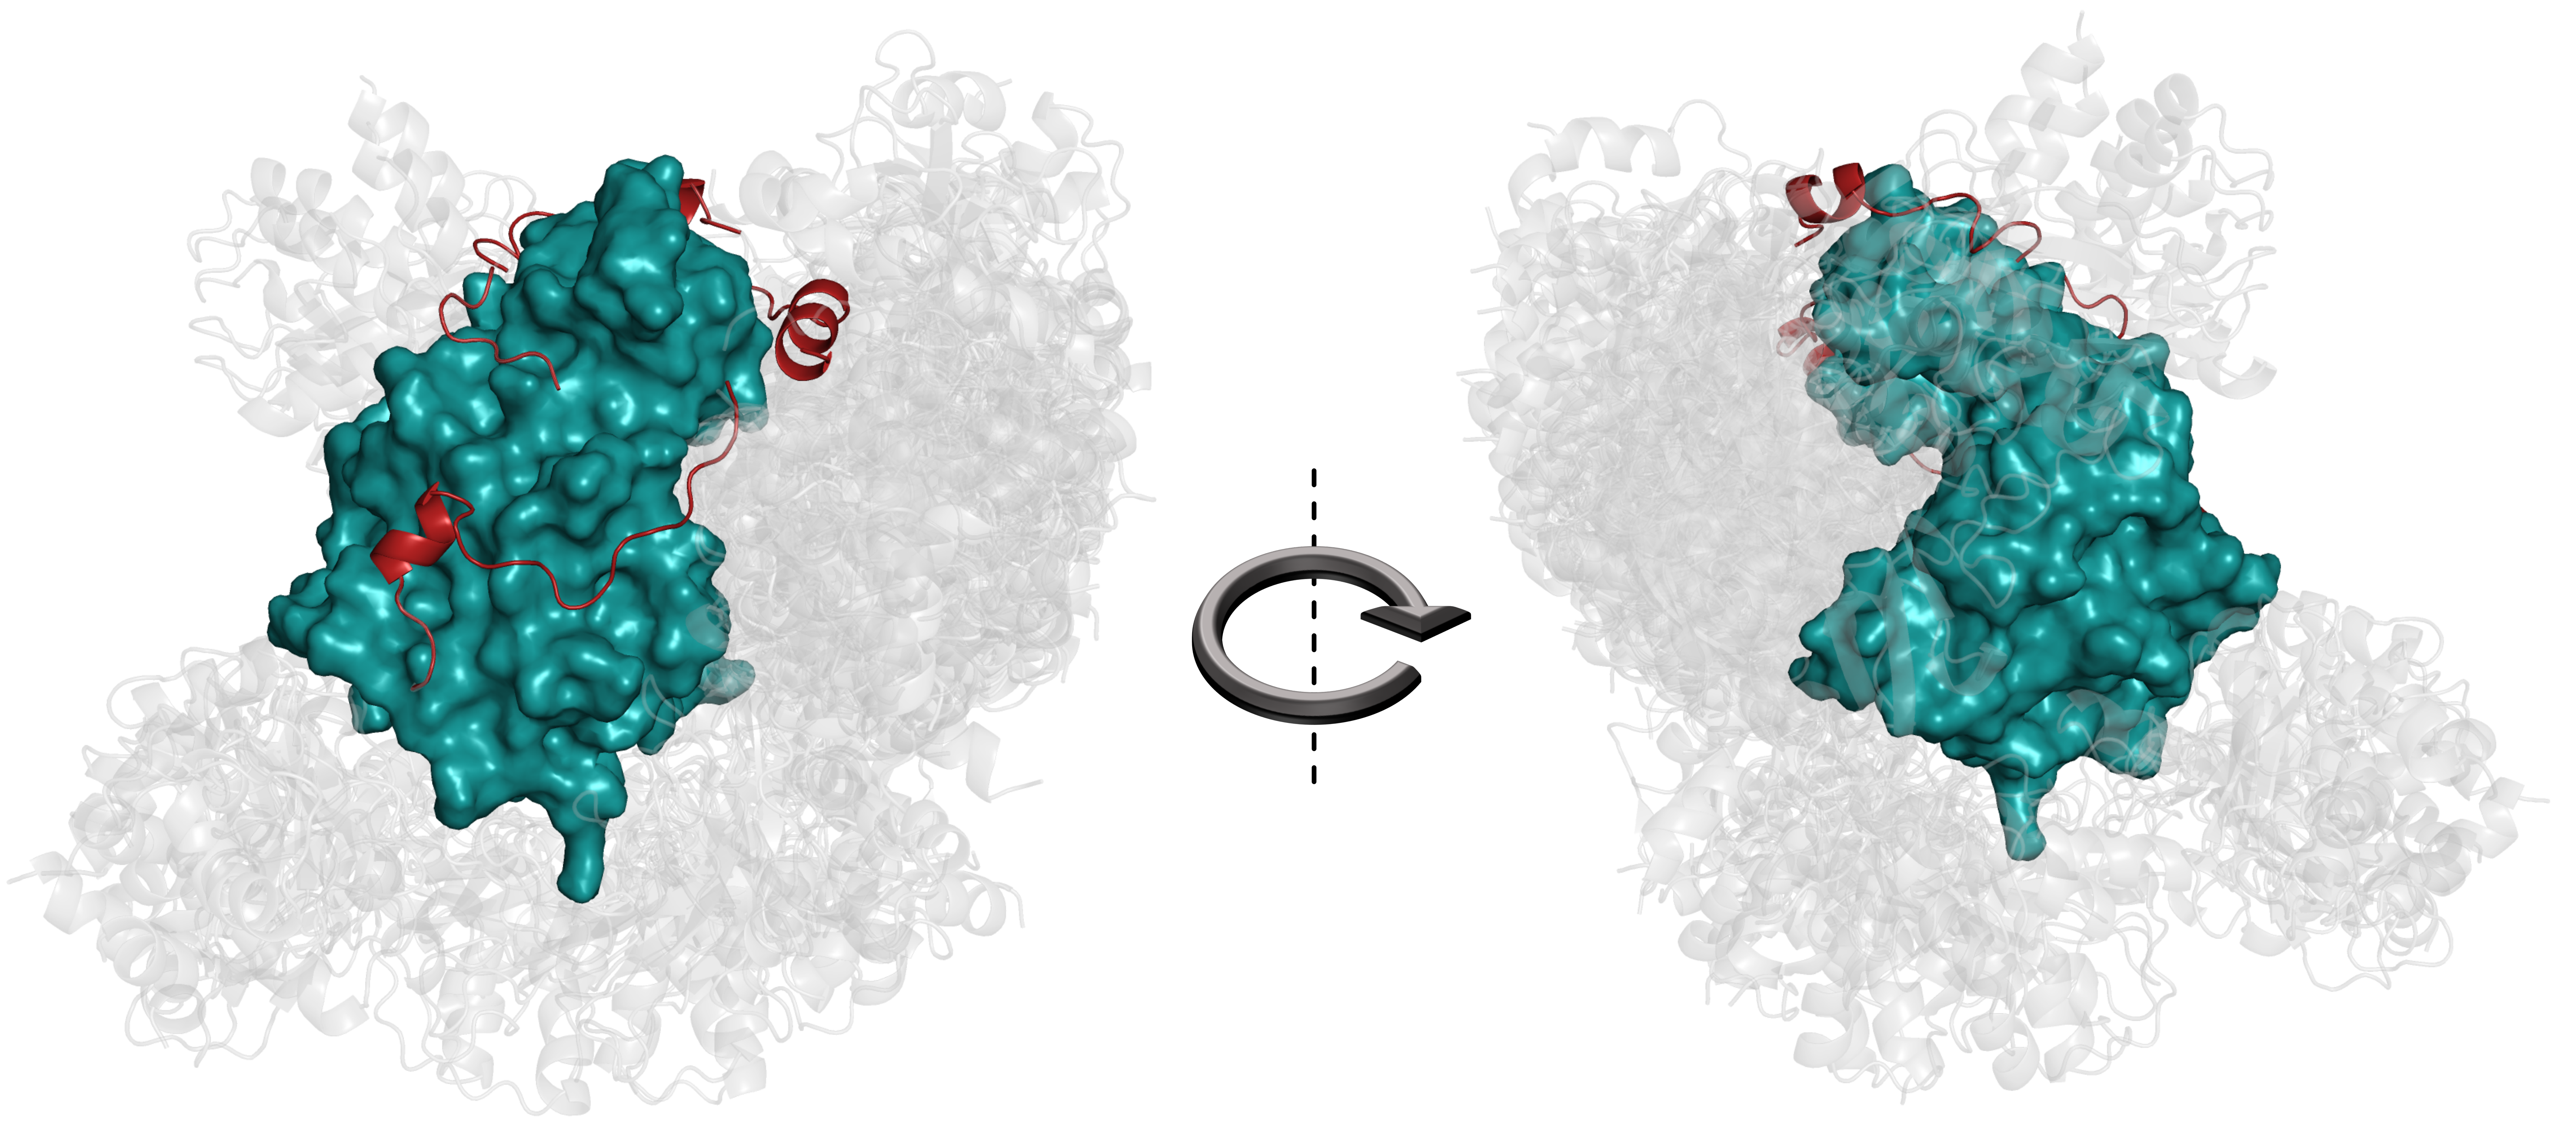

Supplement: NIHMS1708431-supplement-Figure_S4.pdf [file NIHMS1708431-supplement-Figure_S4.pdf]

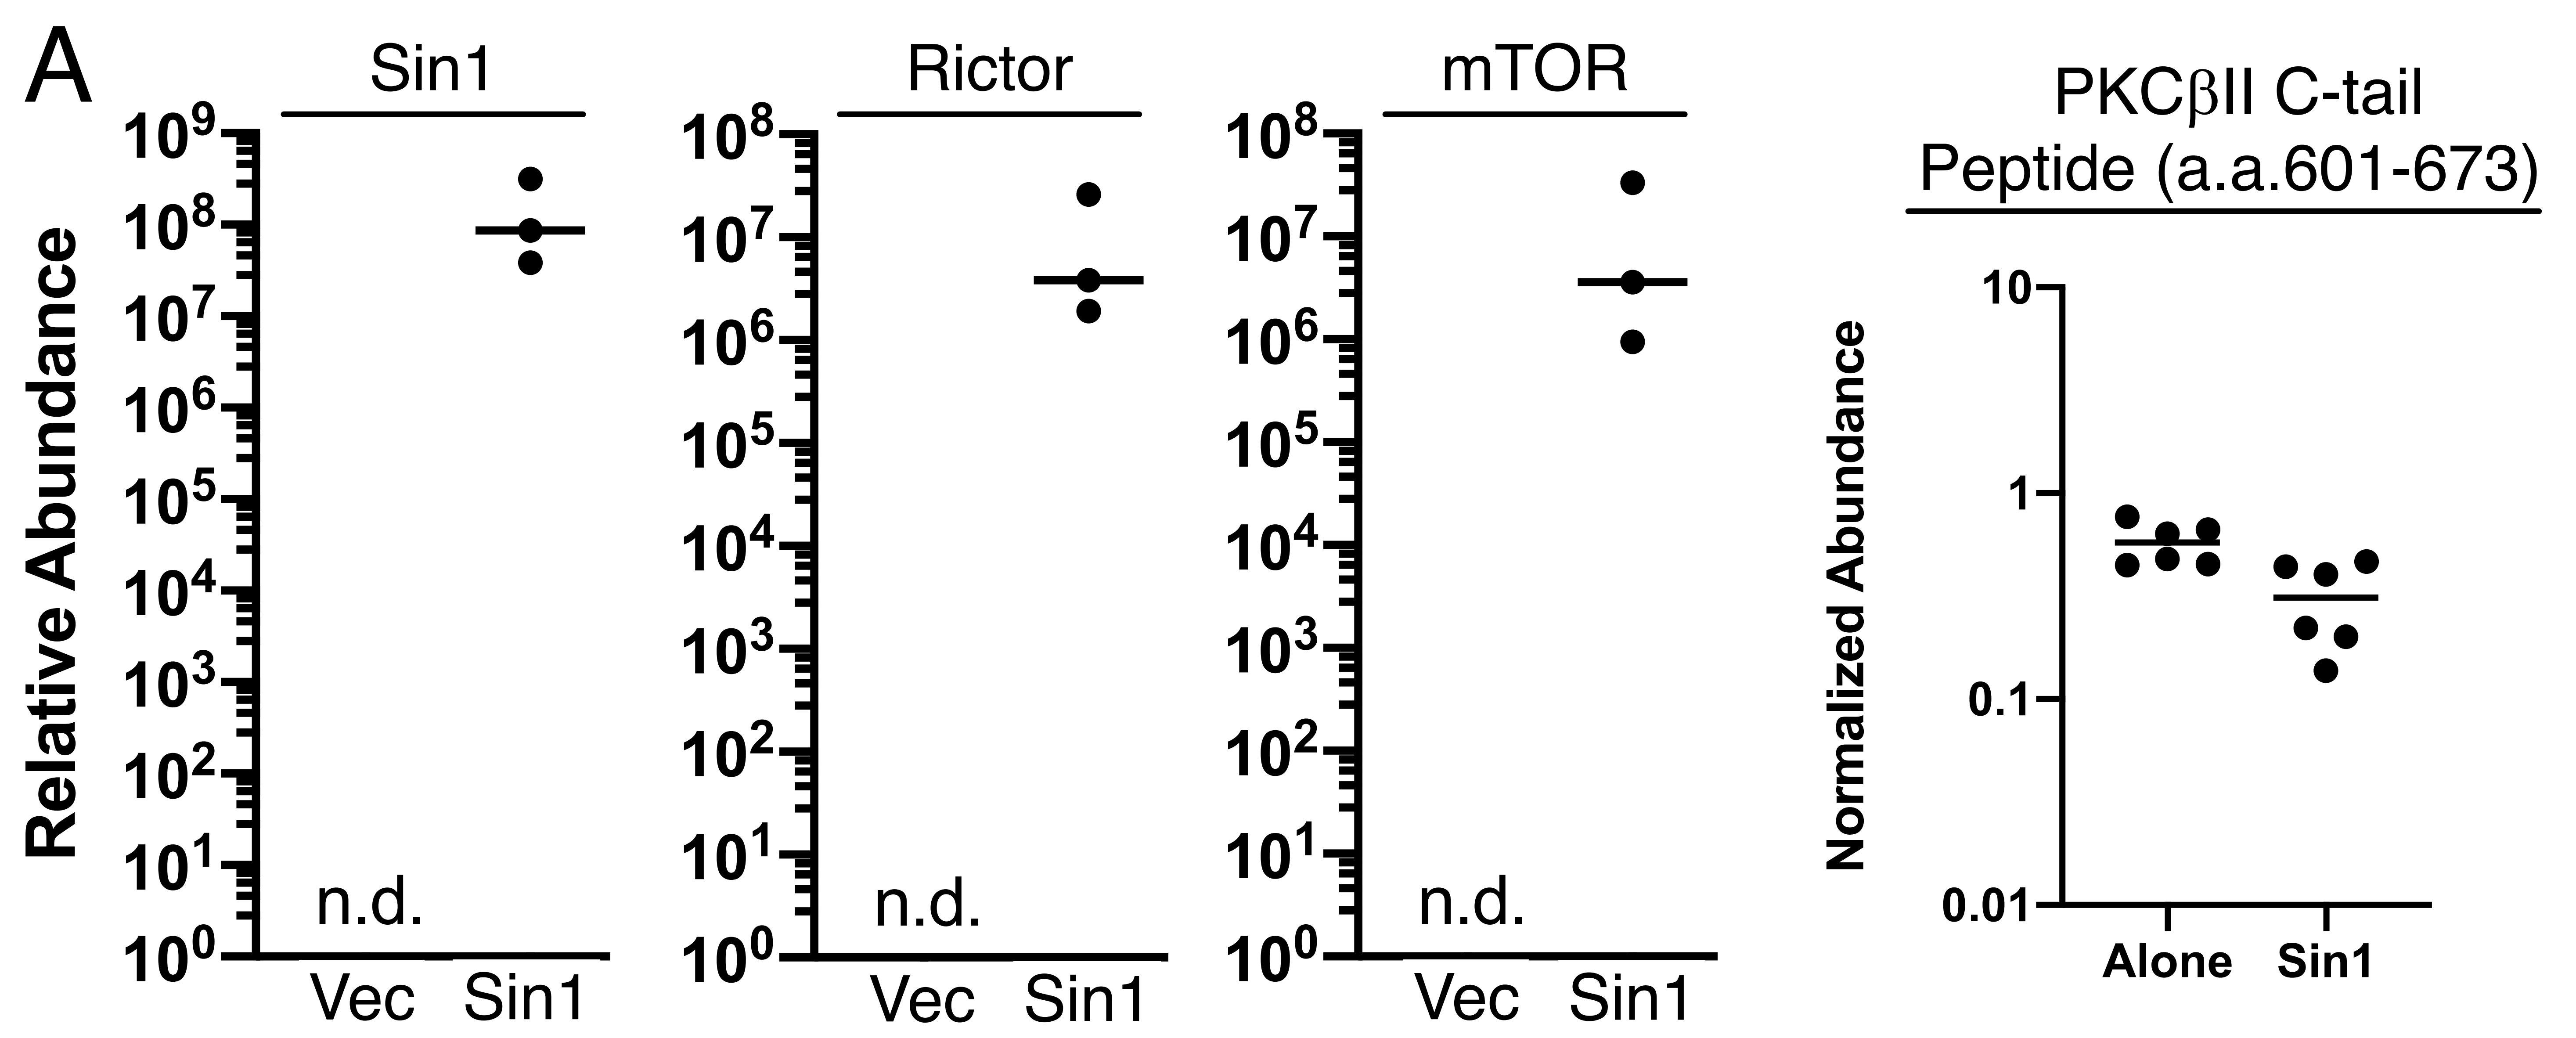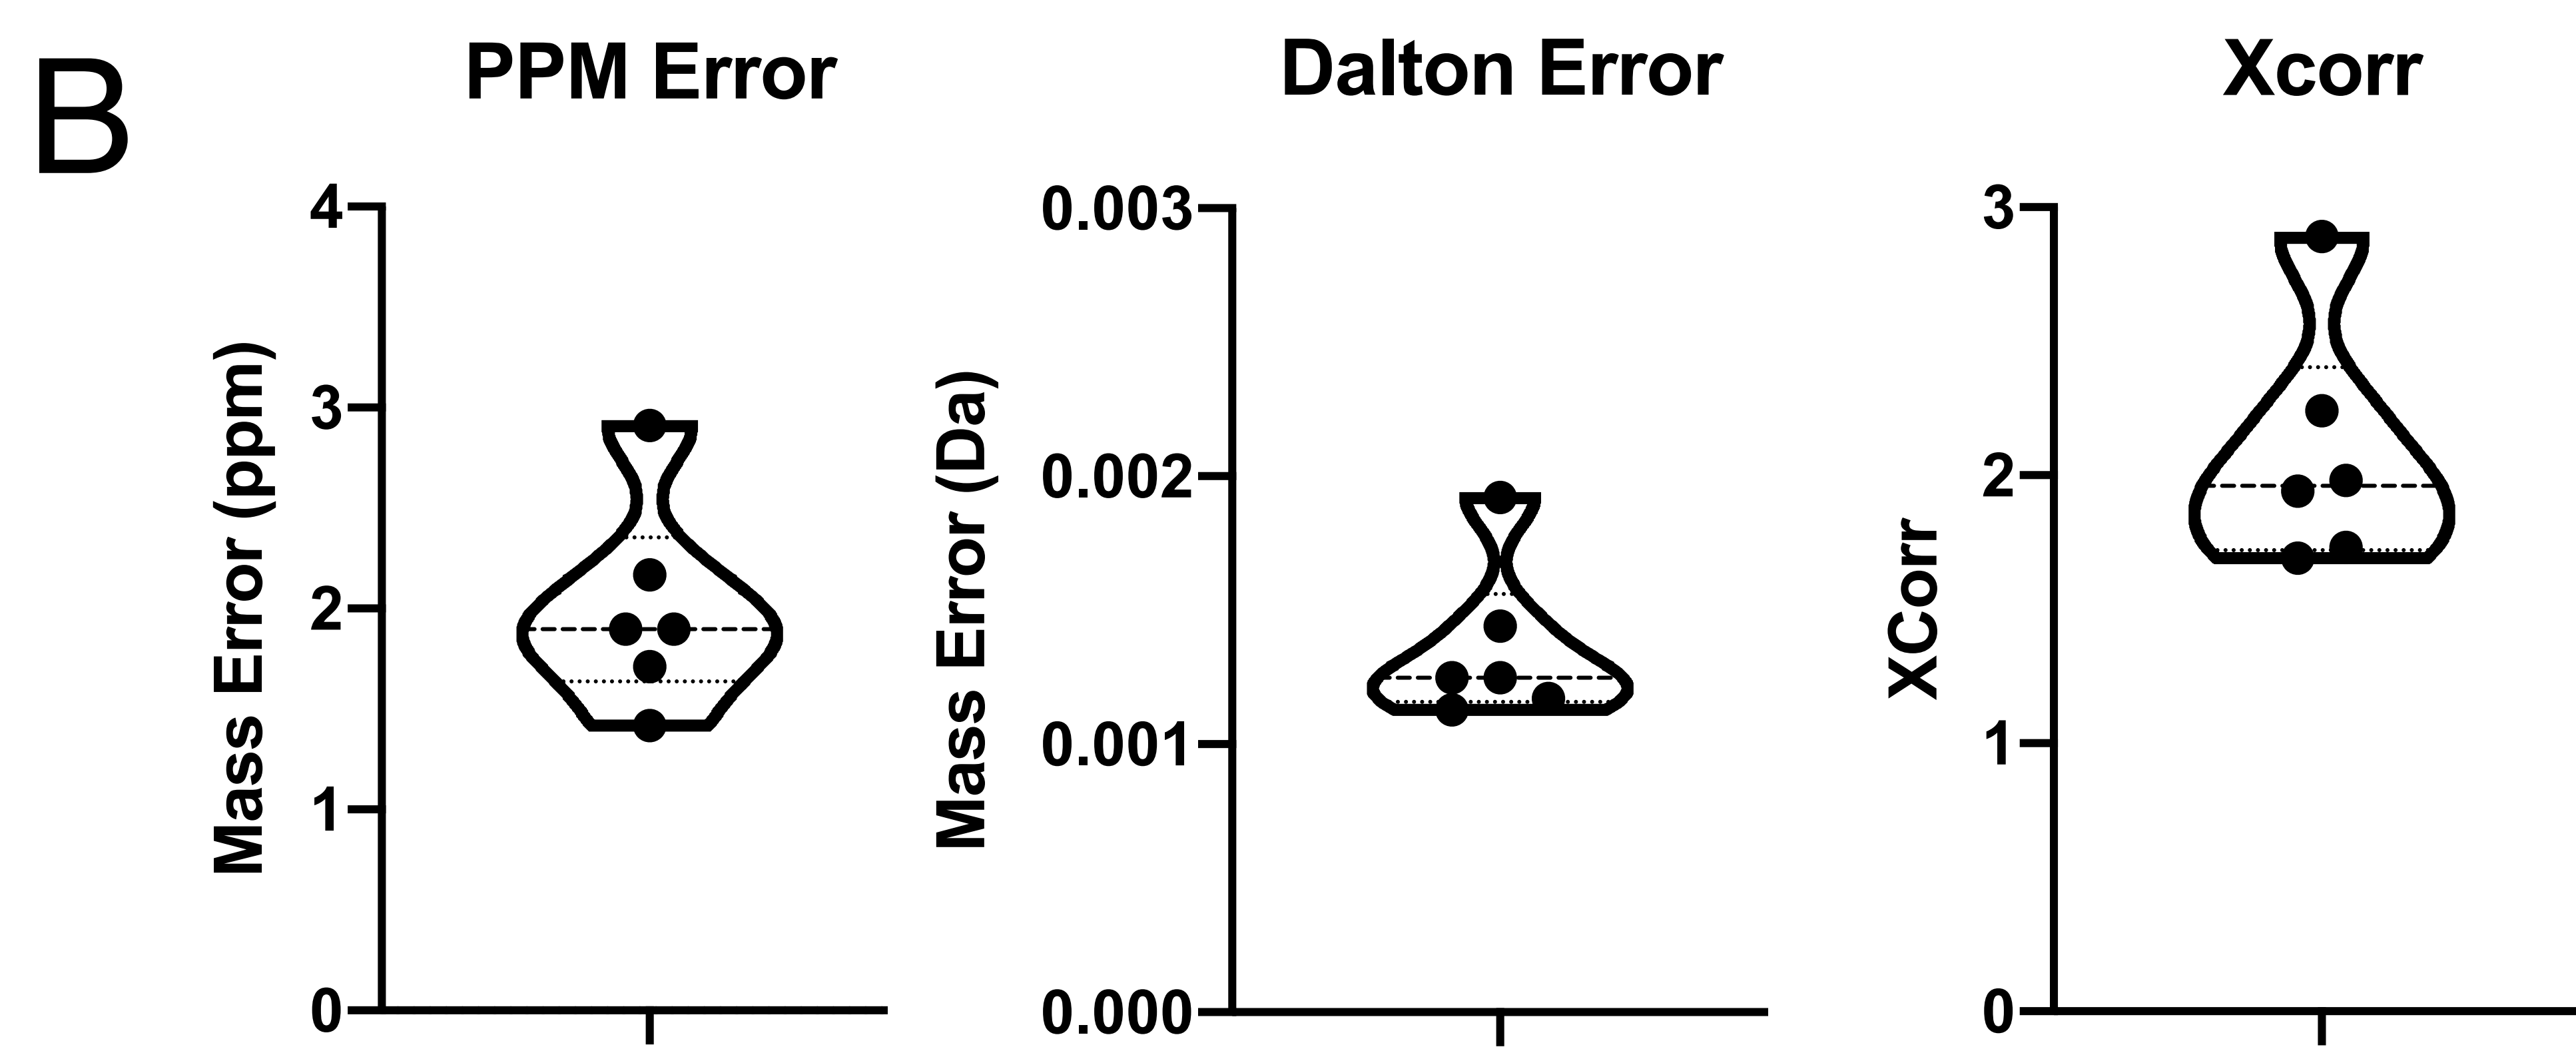

Supplement: NIHMS1708431-supplement-Figure_S5.pdf [file NIHMS1708431-supplement-Figure_S5.pdf]

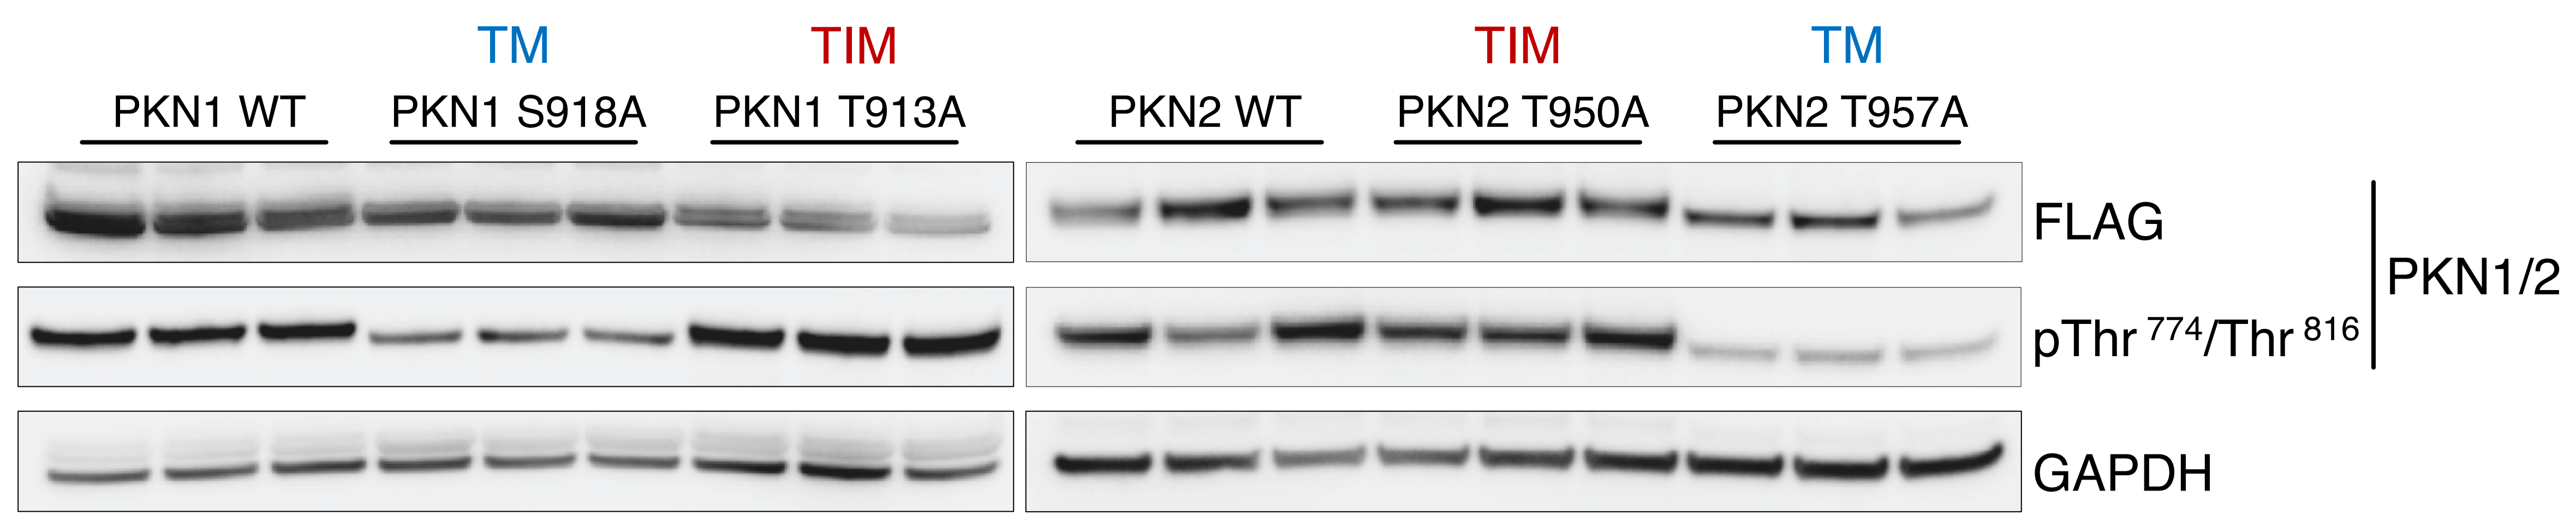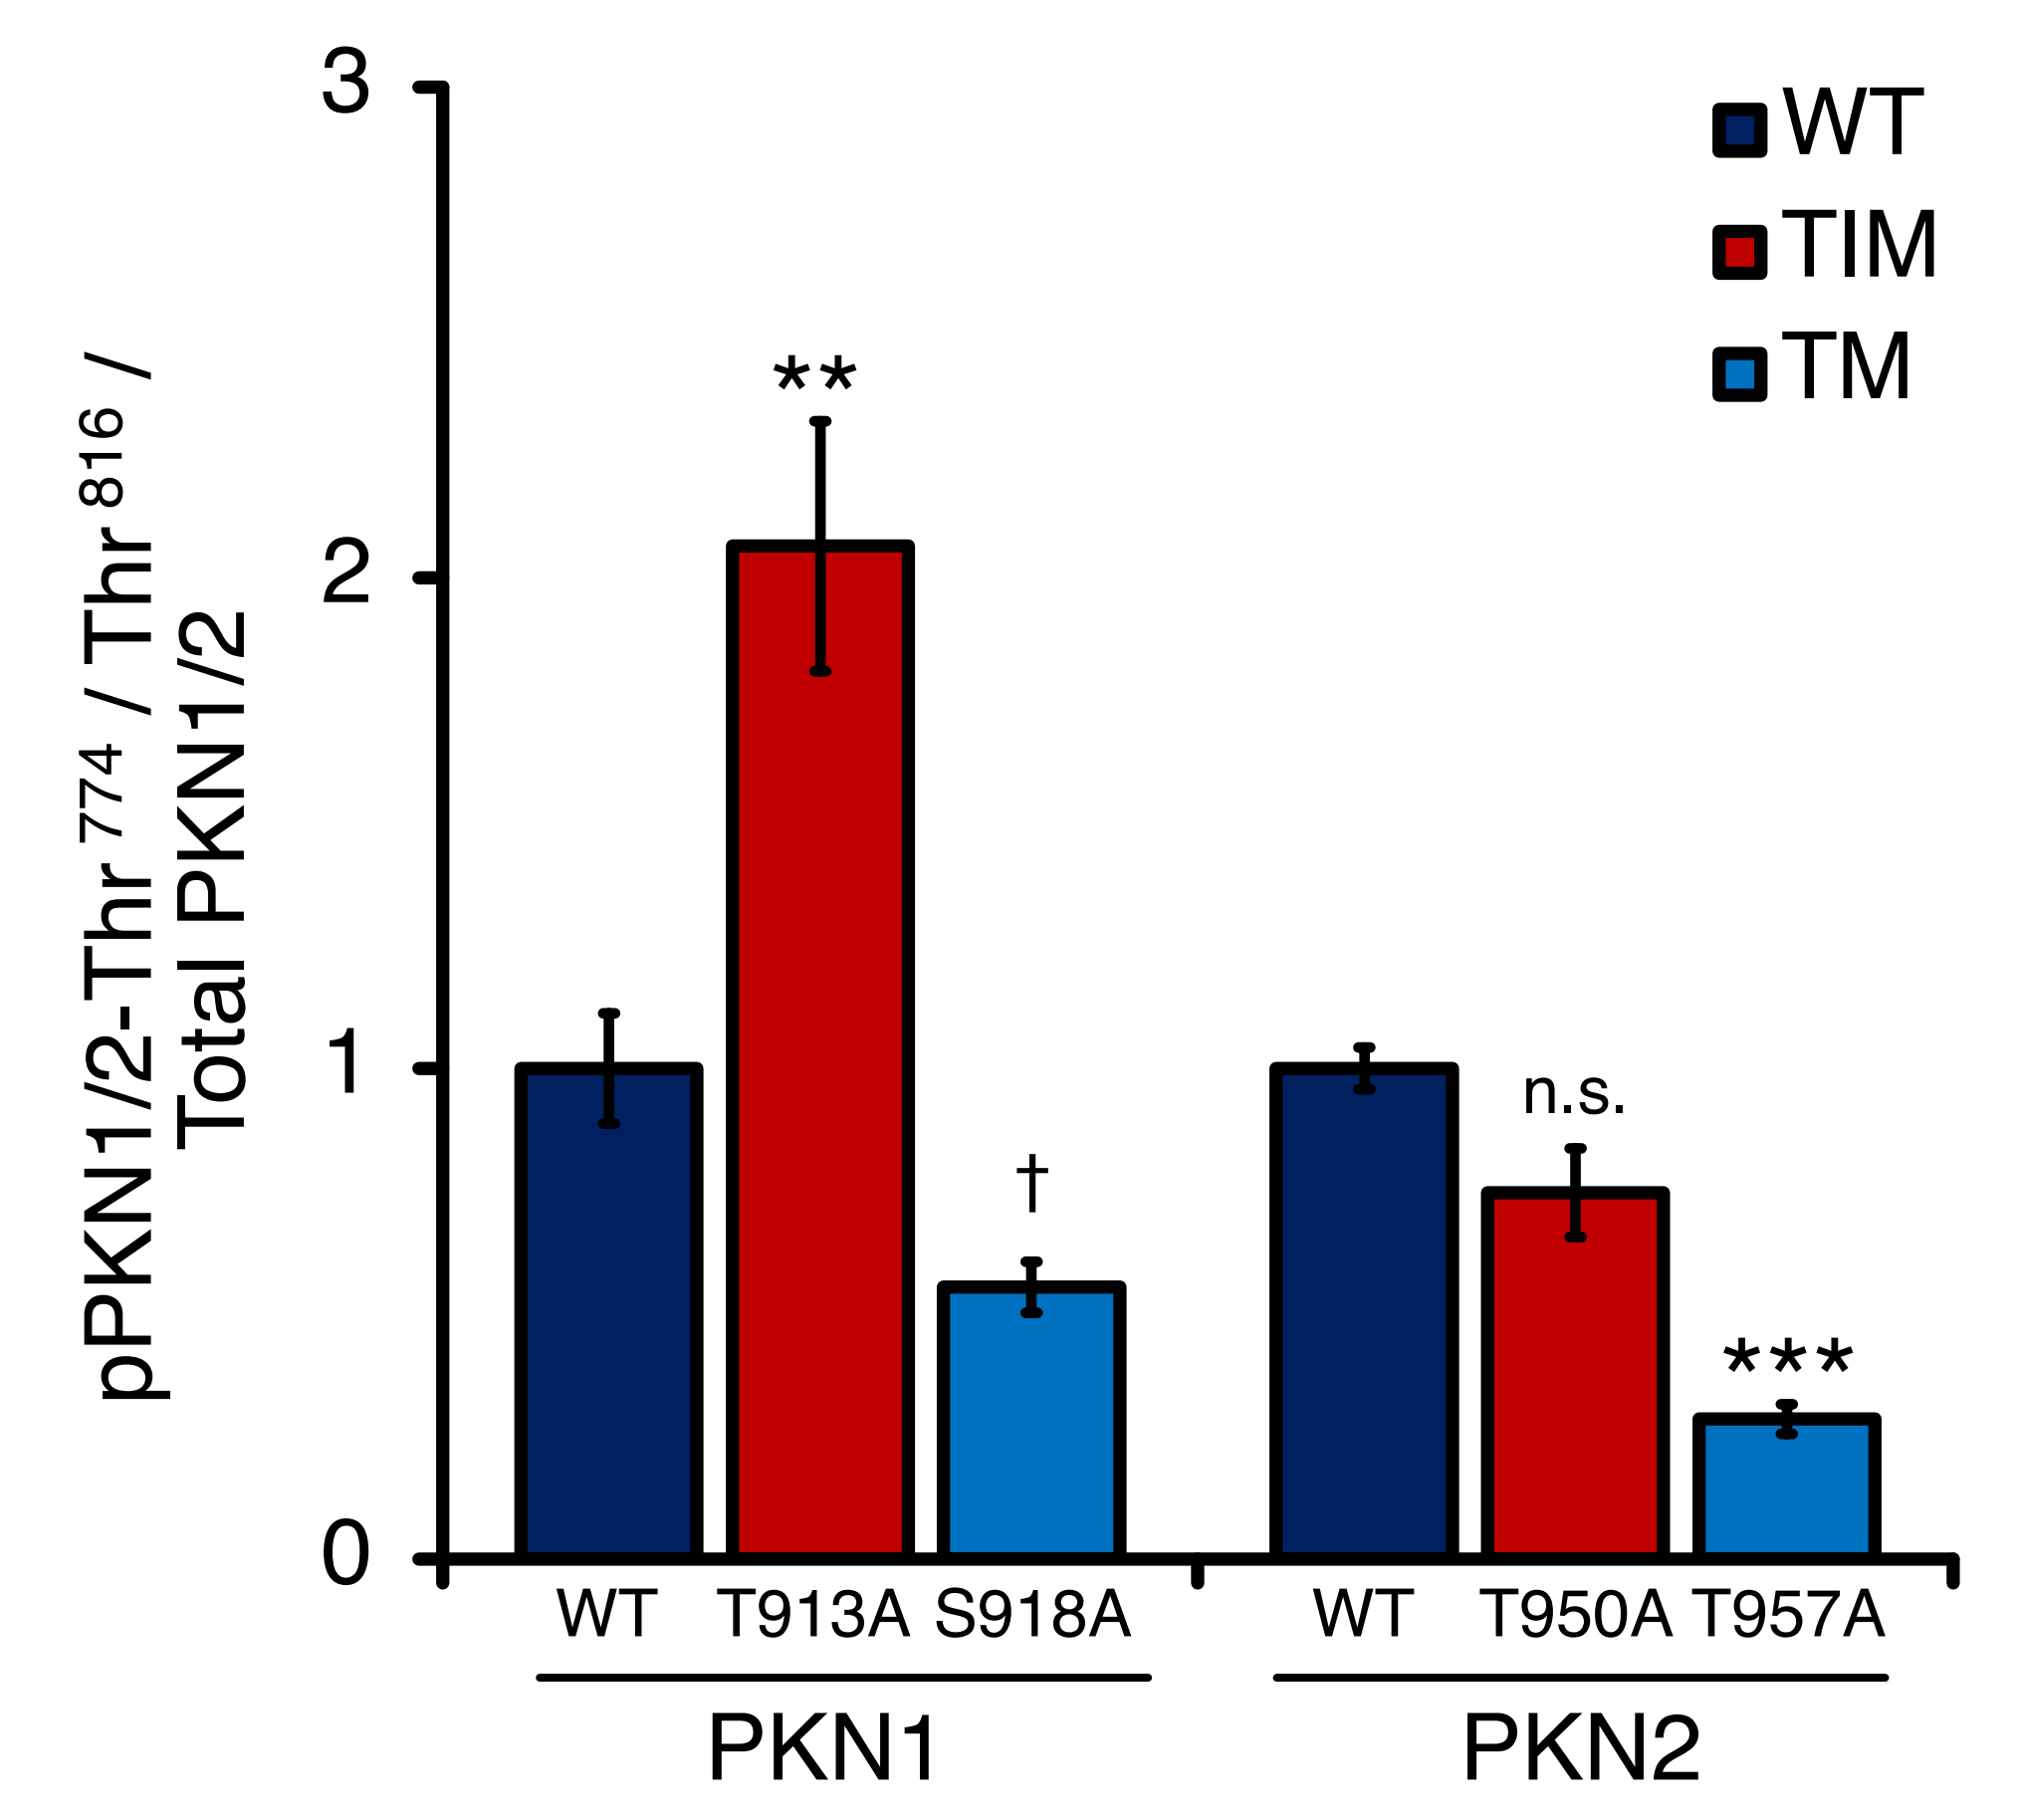

Supplement: NIHMS1708431-supplement-Figure_S8.pdf [file NIHMS1708431-supplement-Figure_S8.pdf]

**A**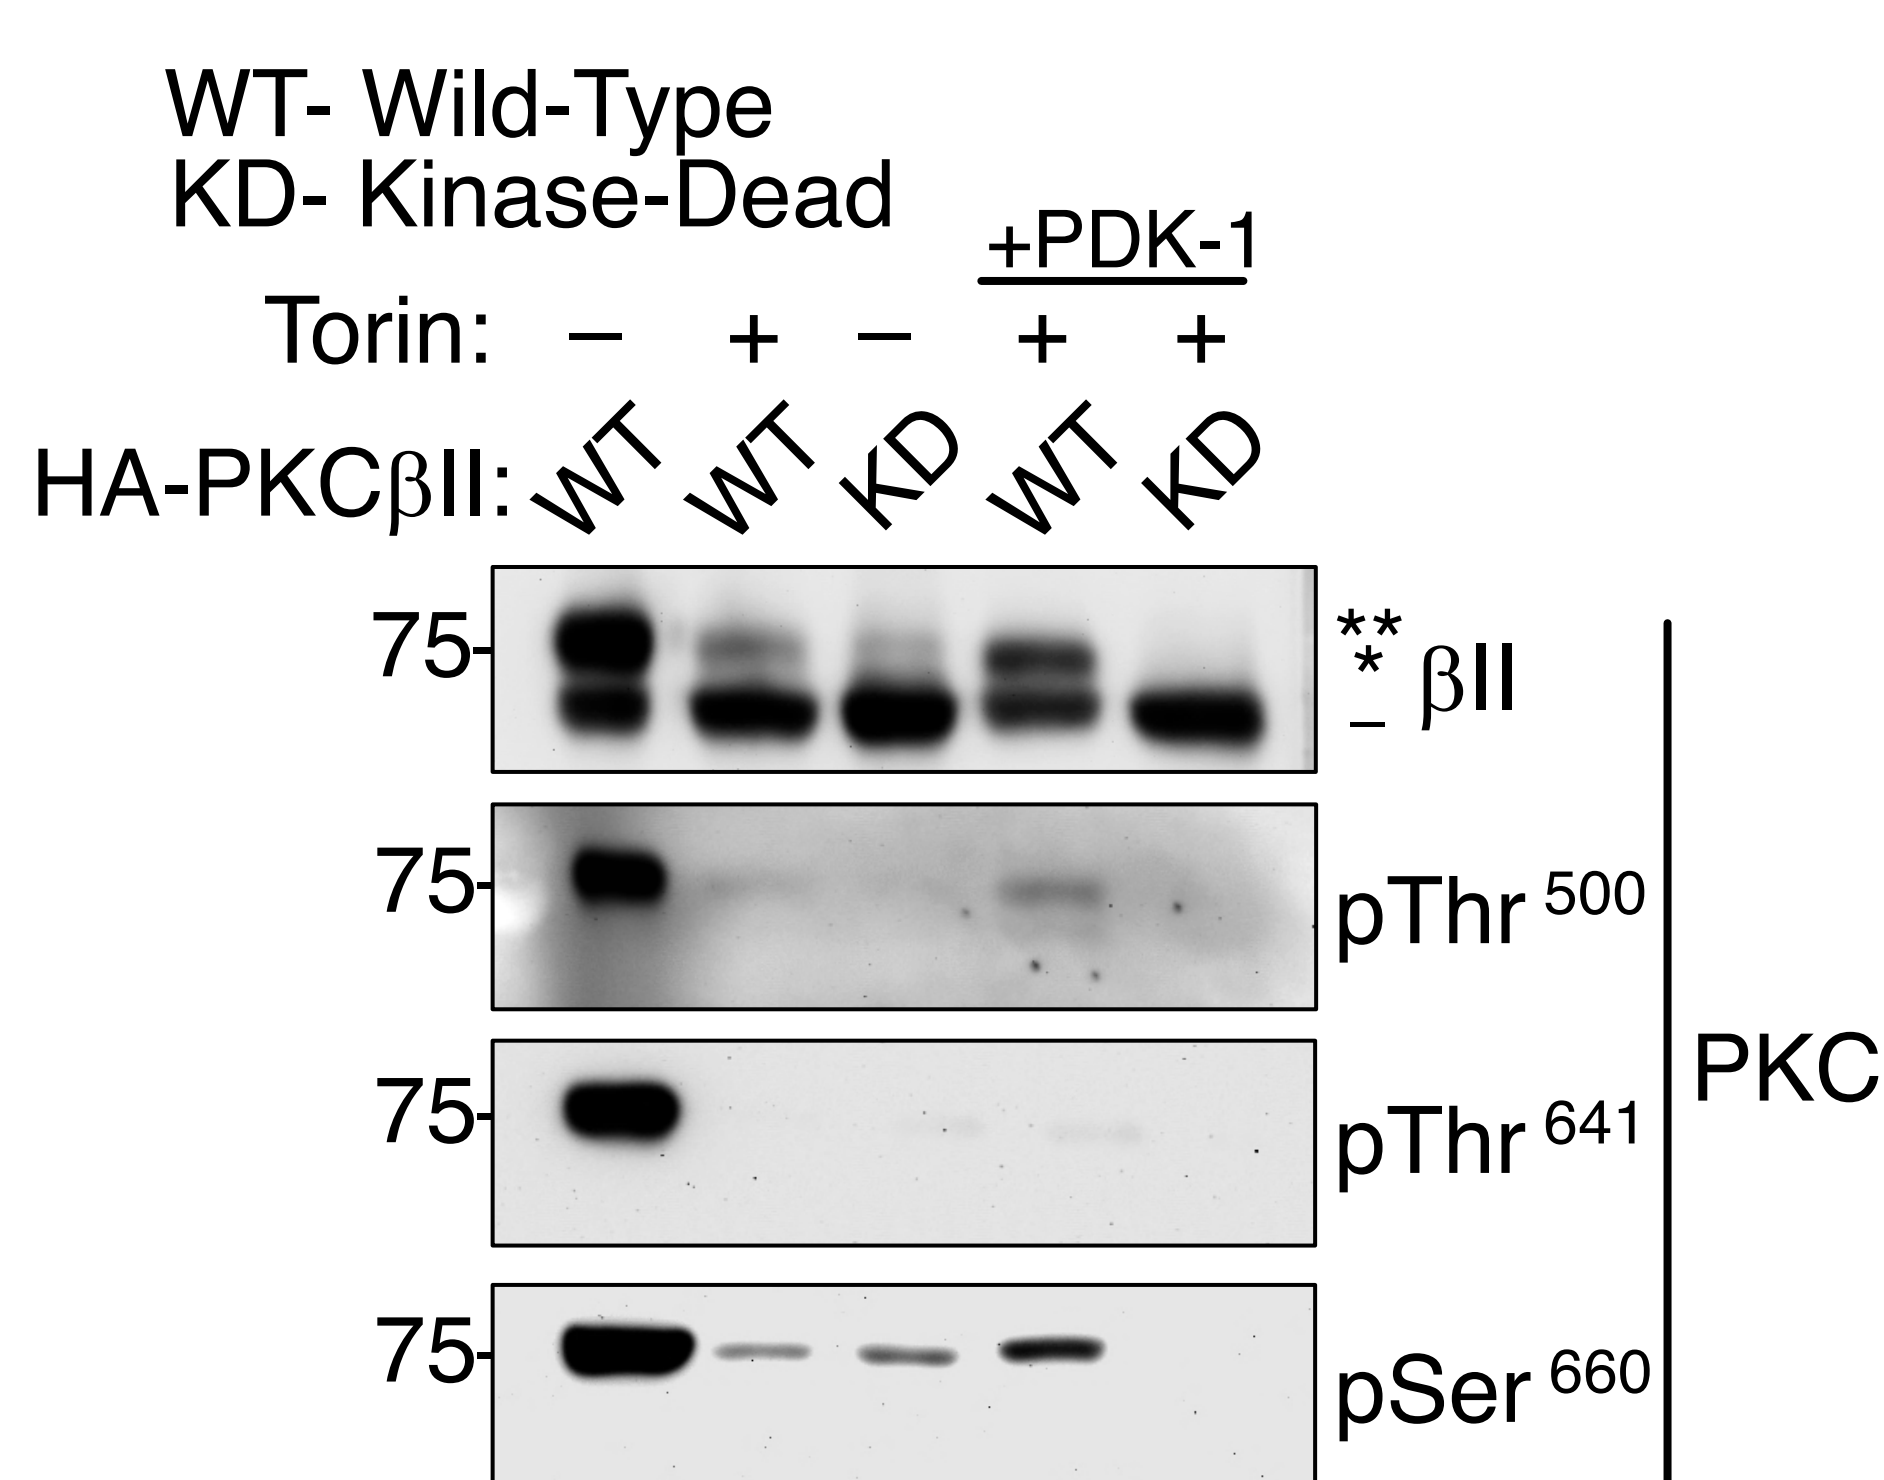**B**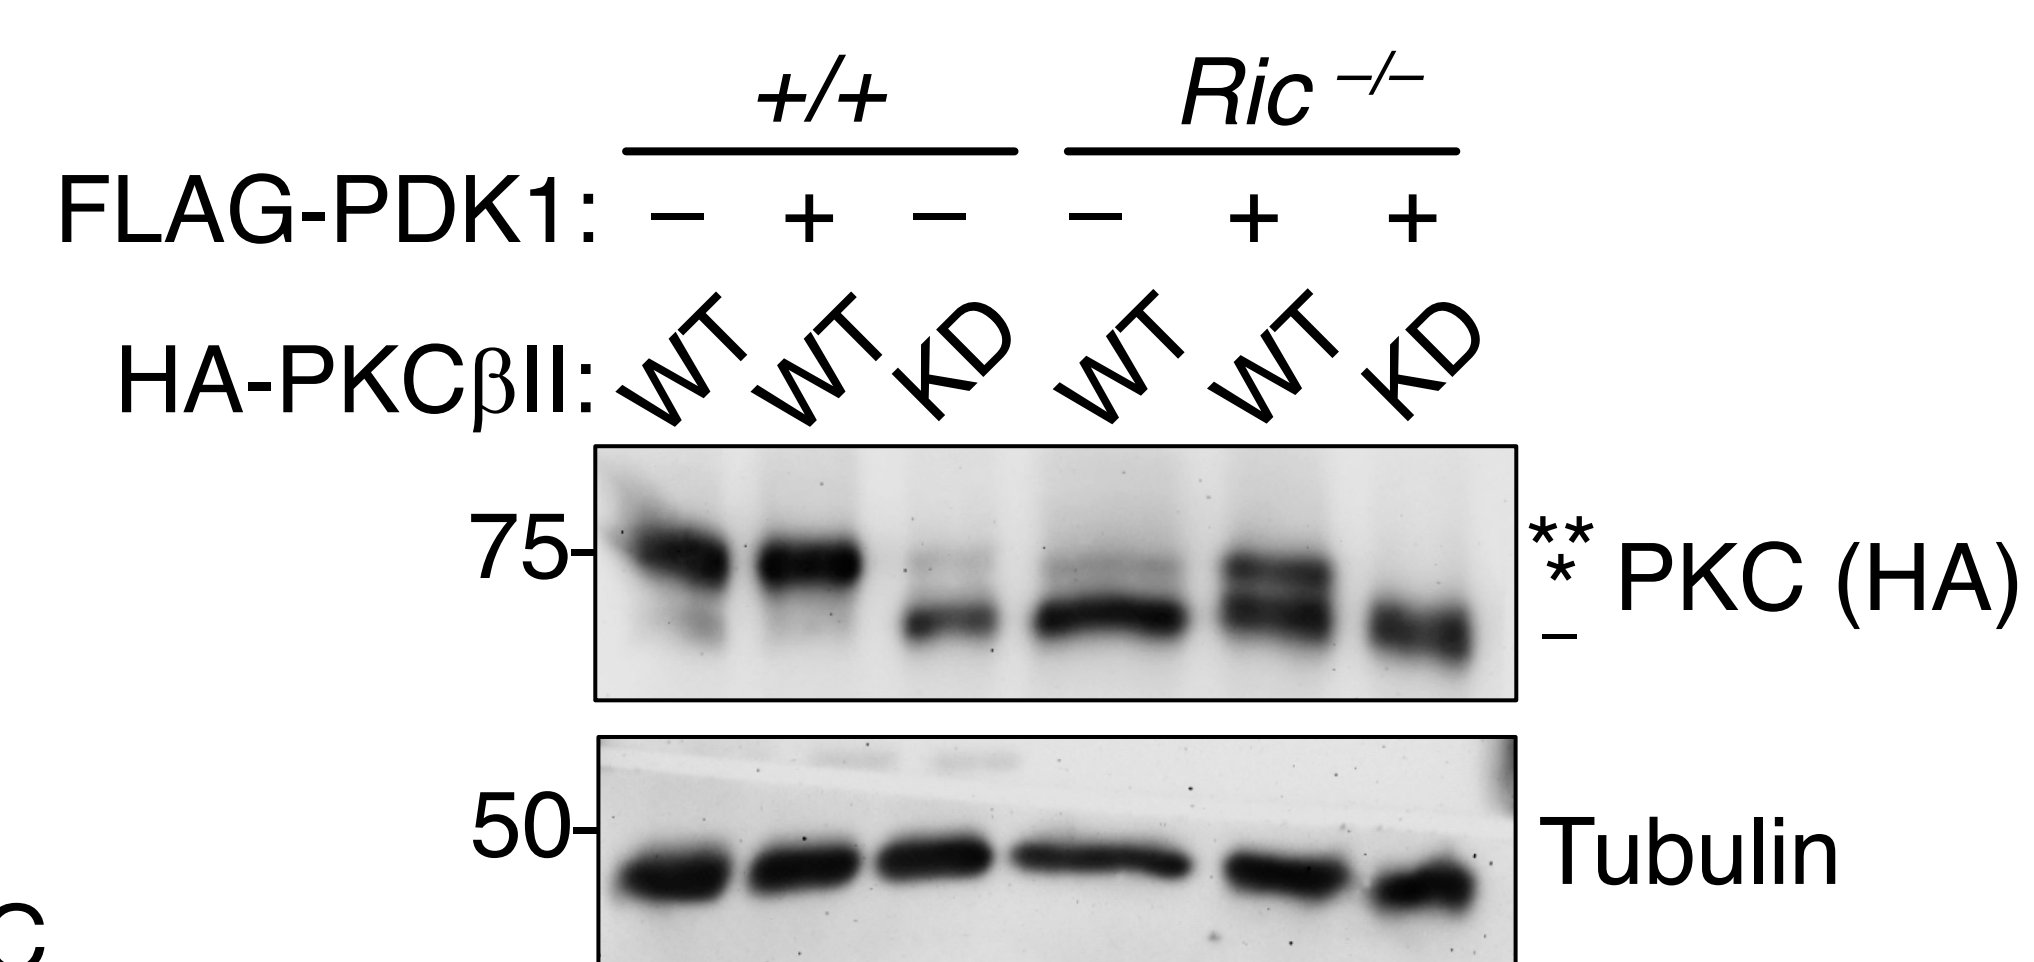**C**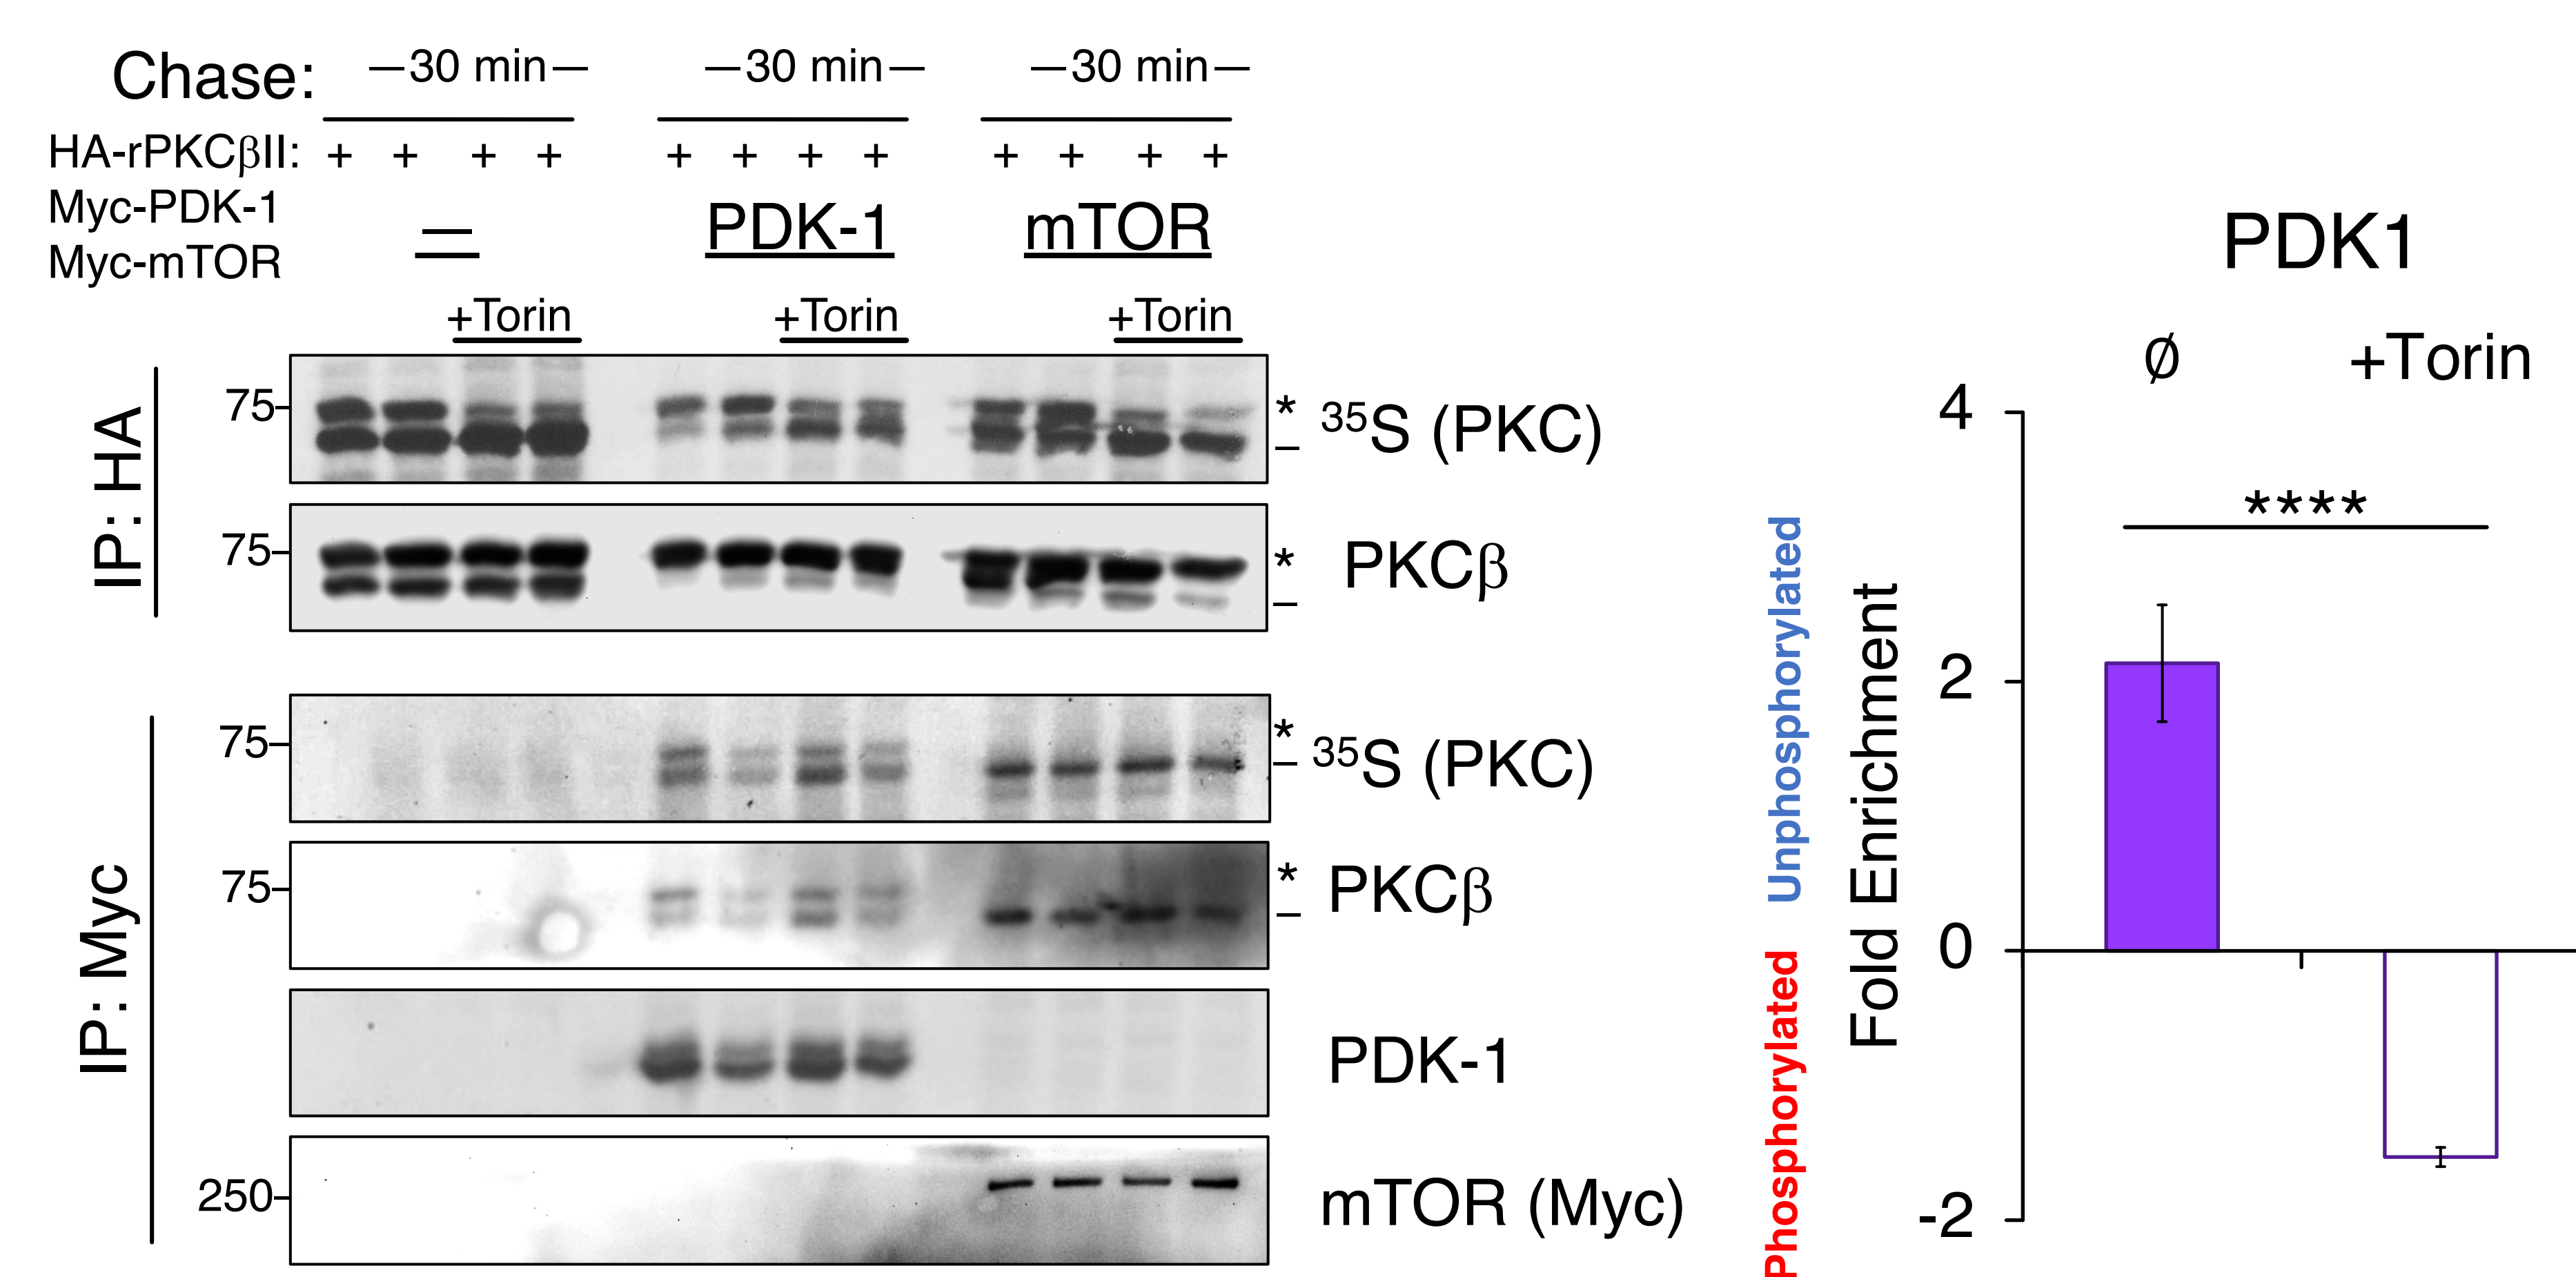**D**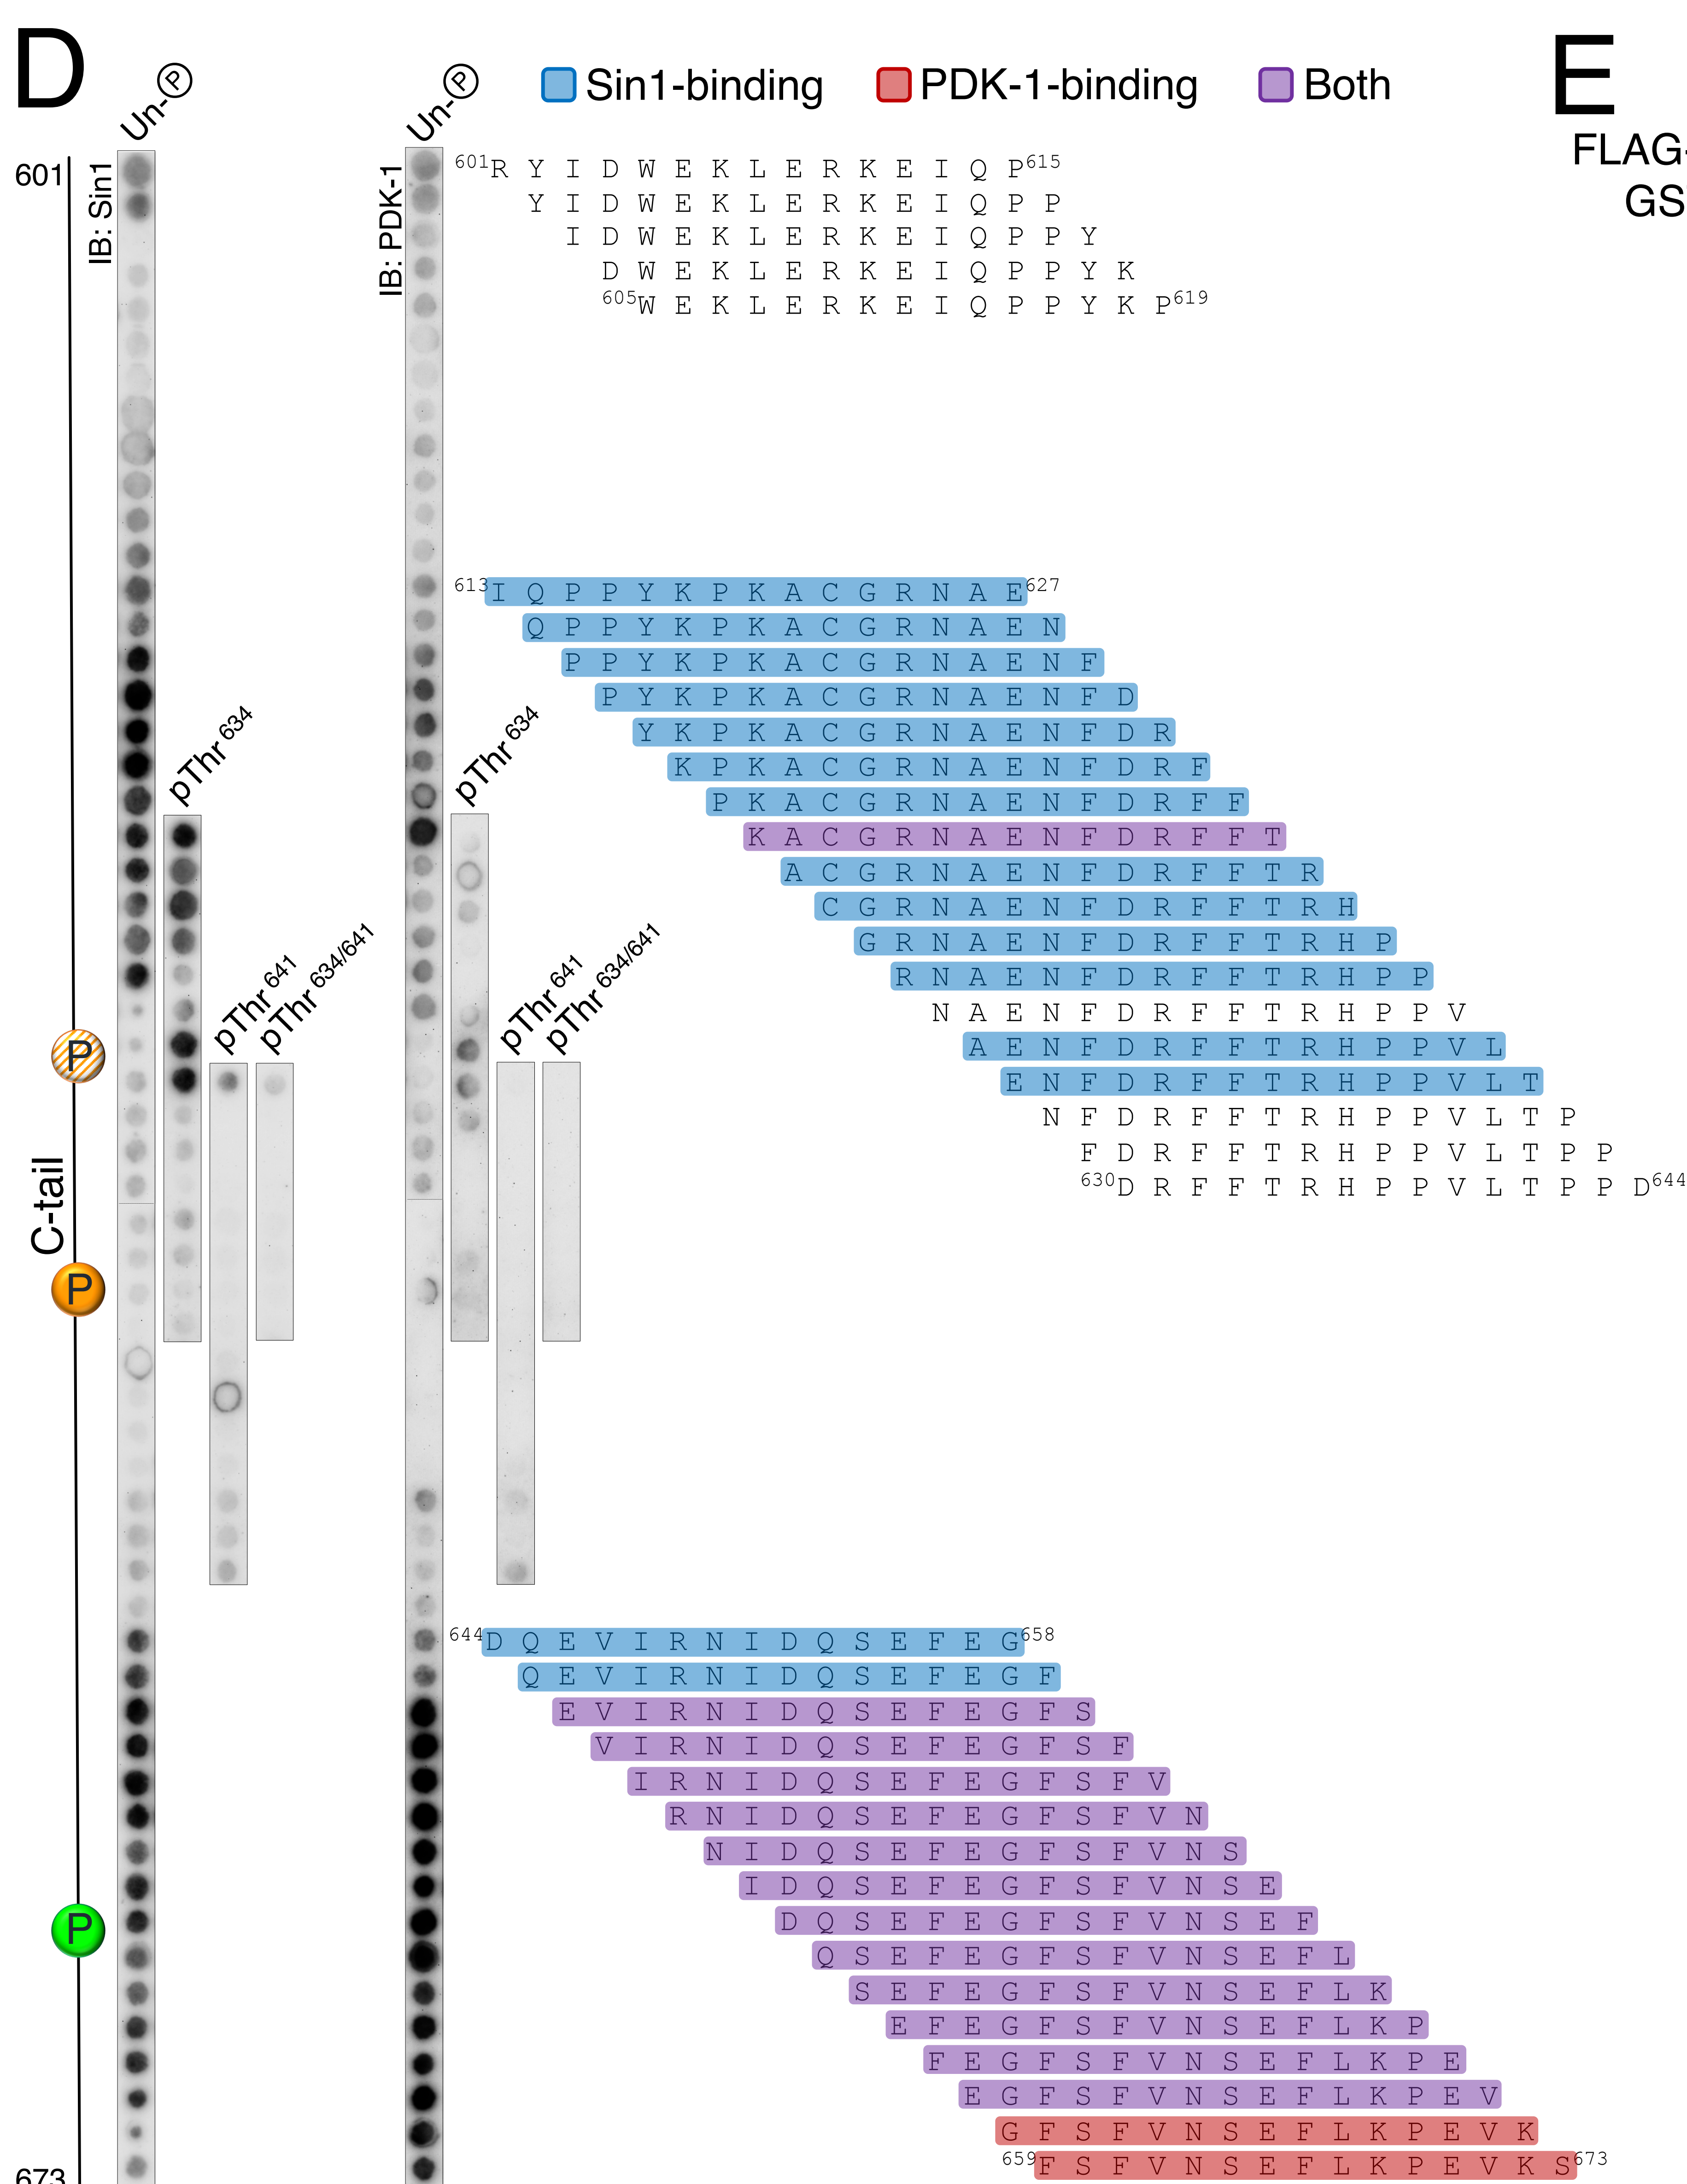**E**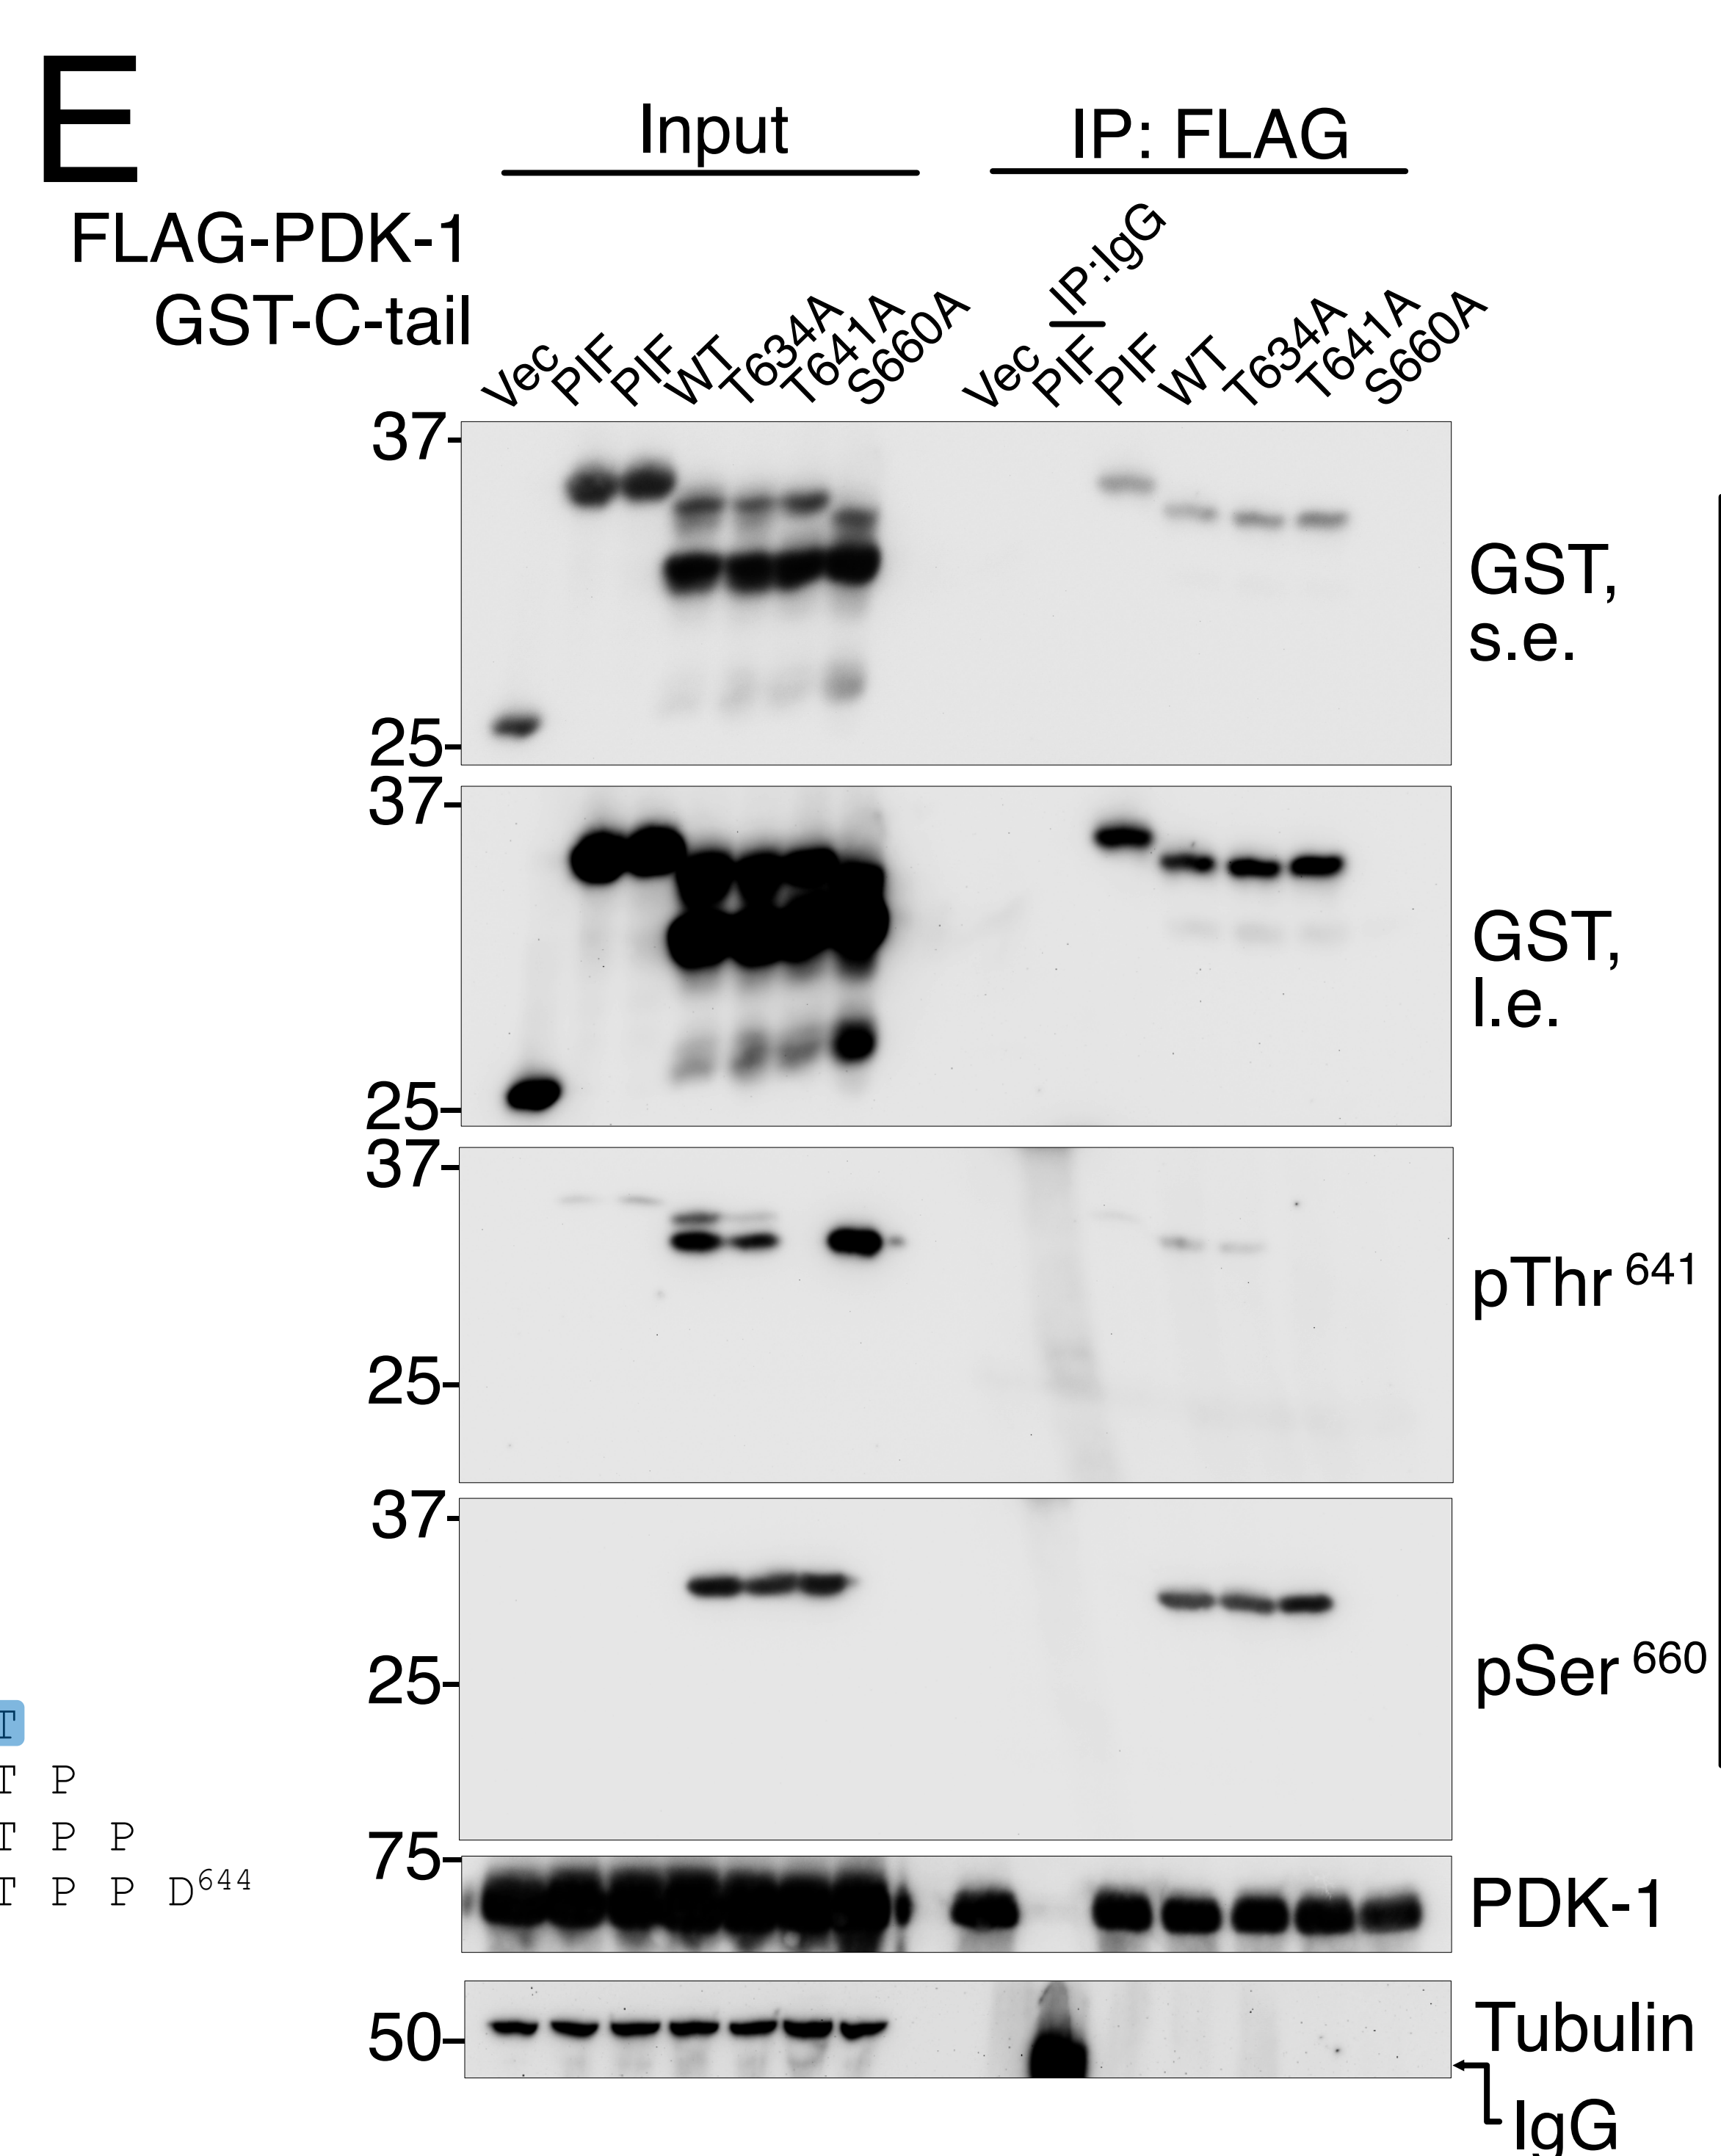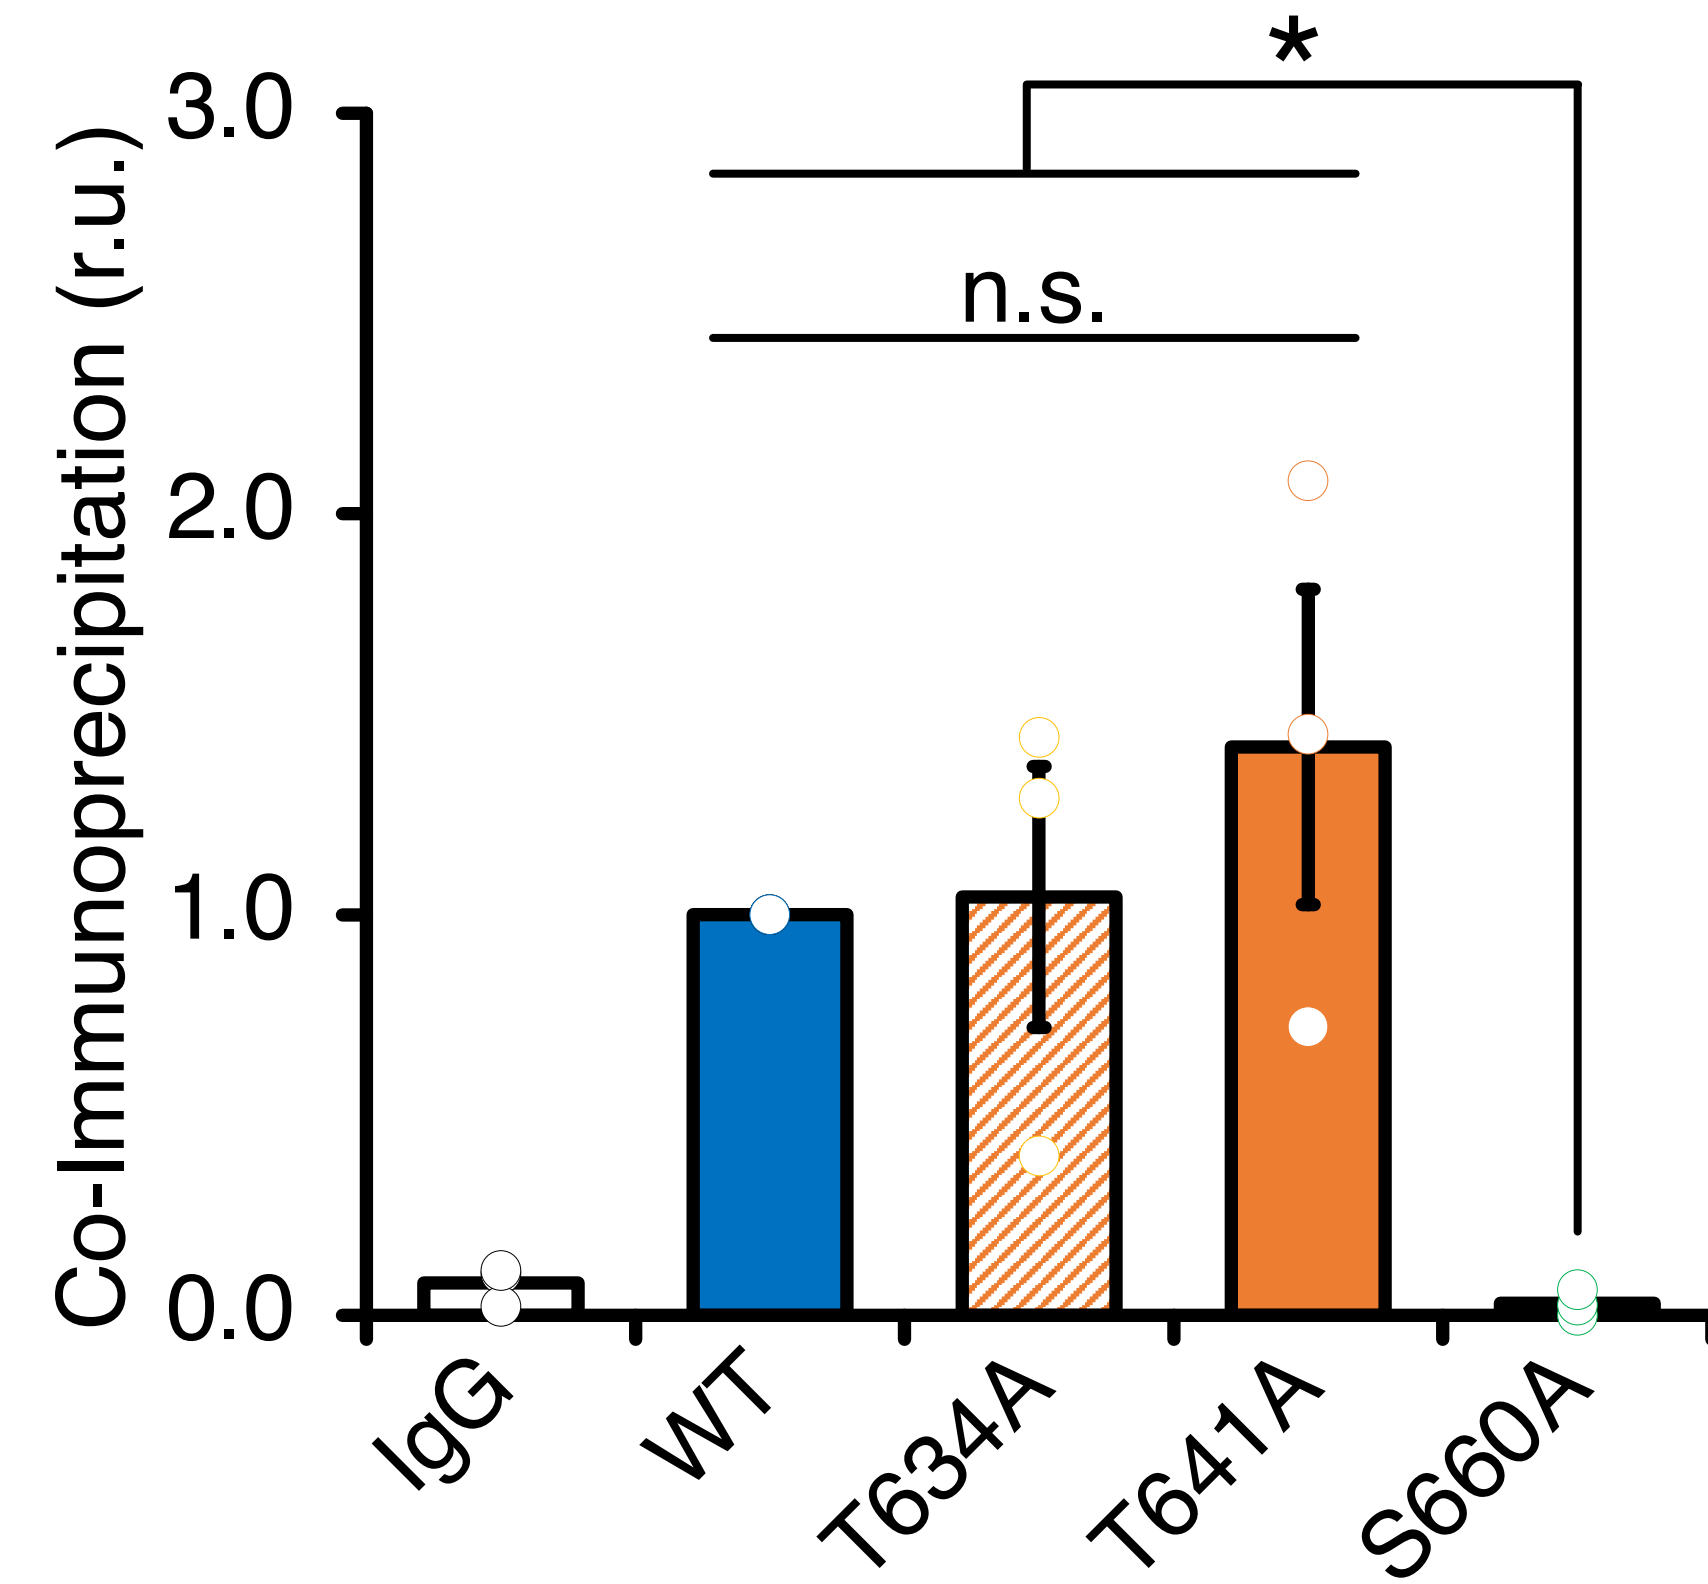**F**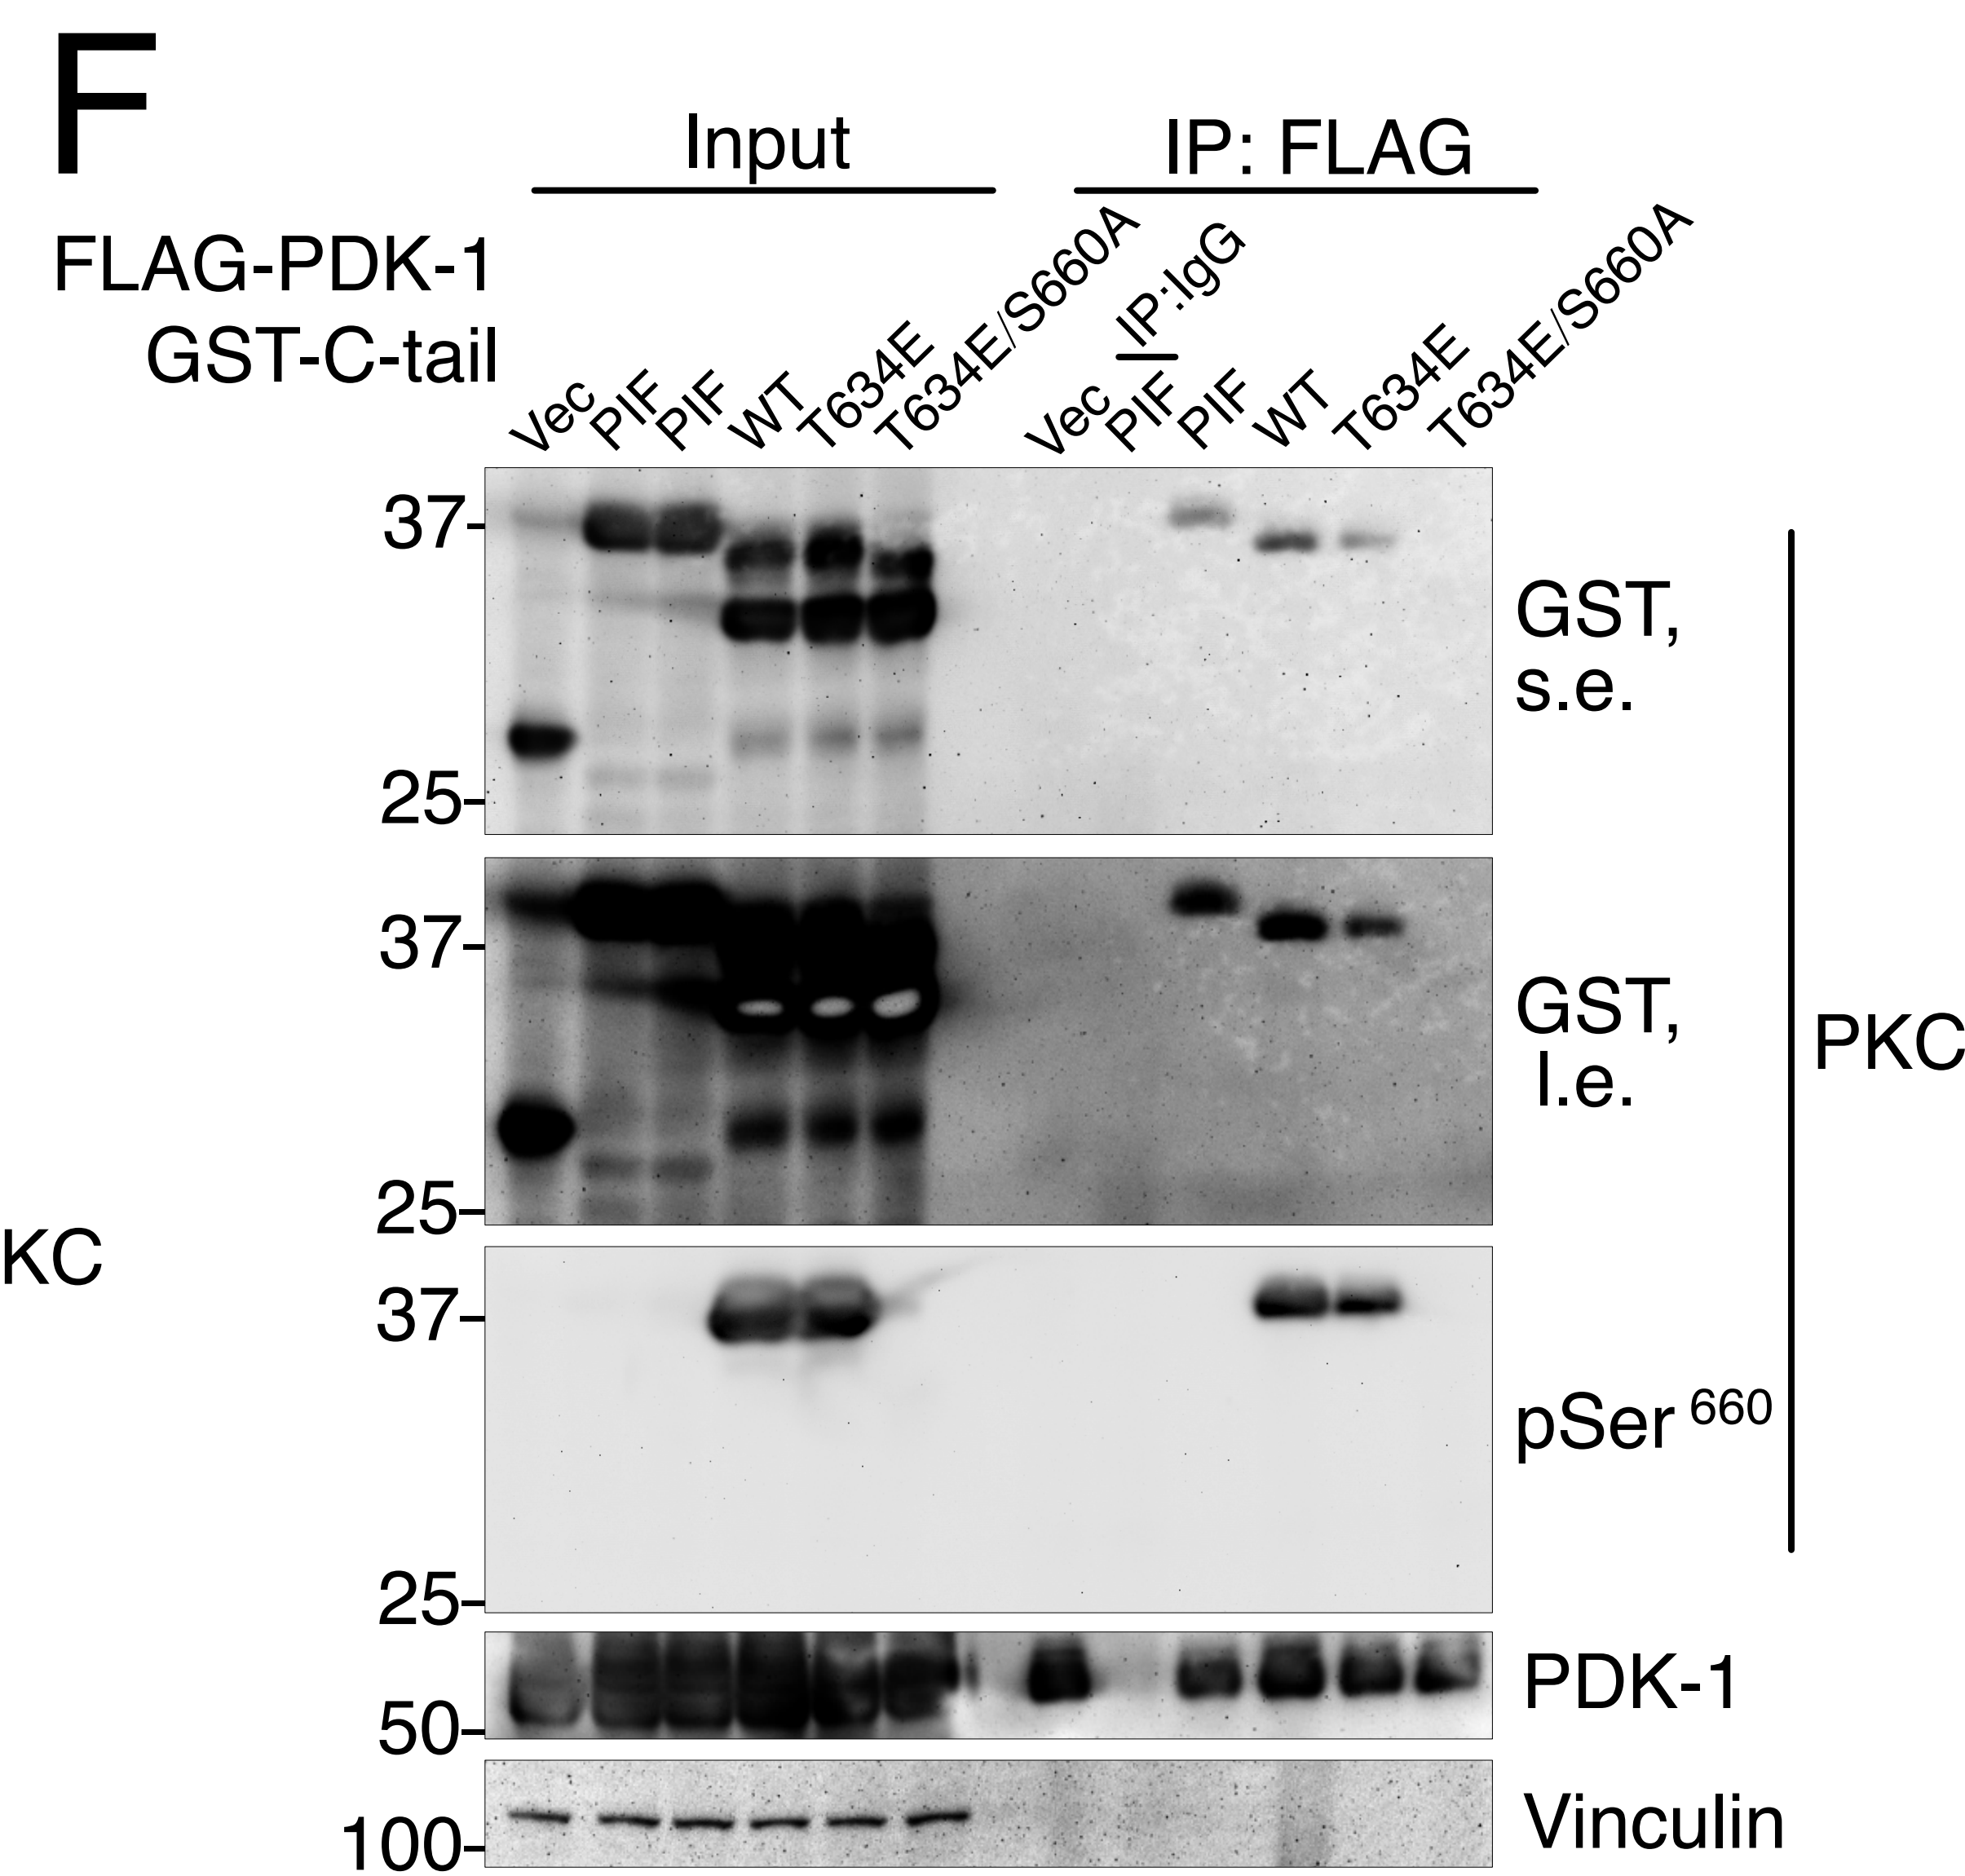**G**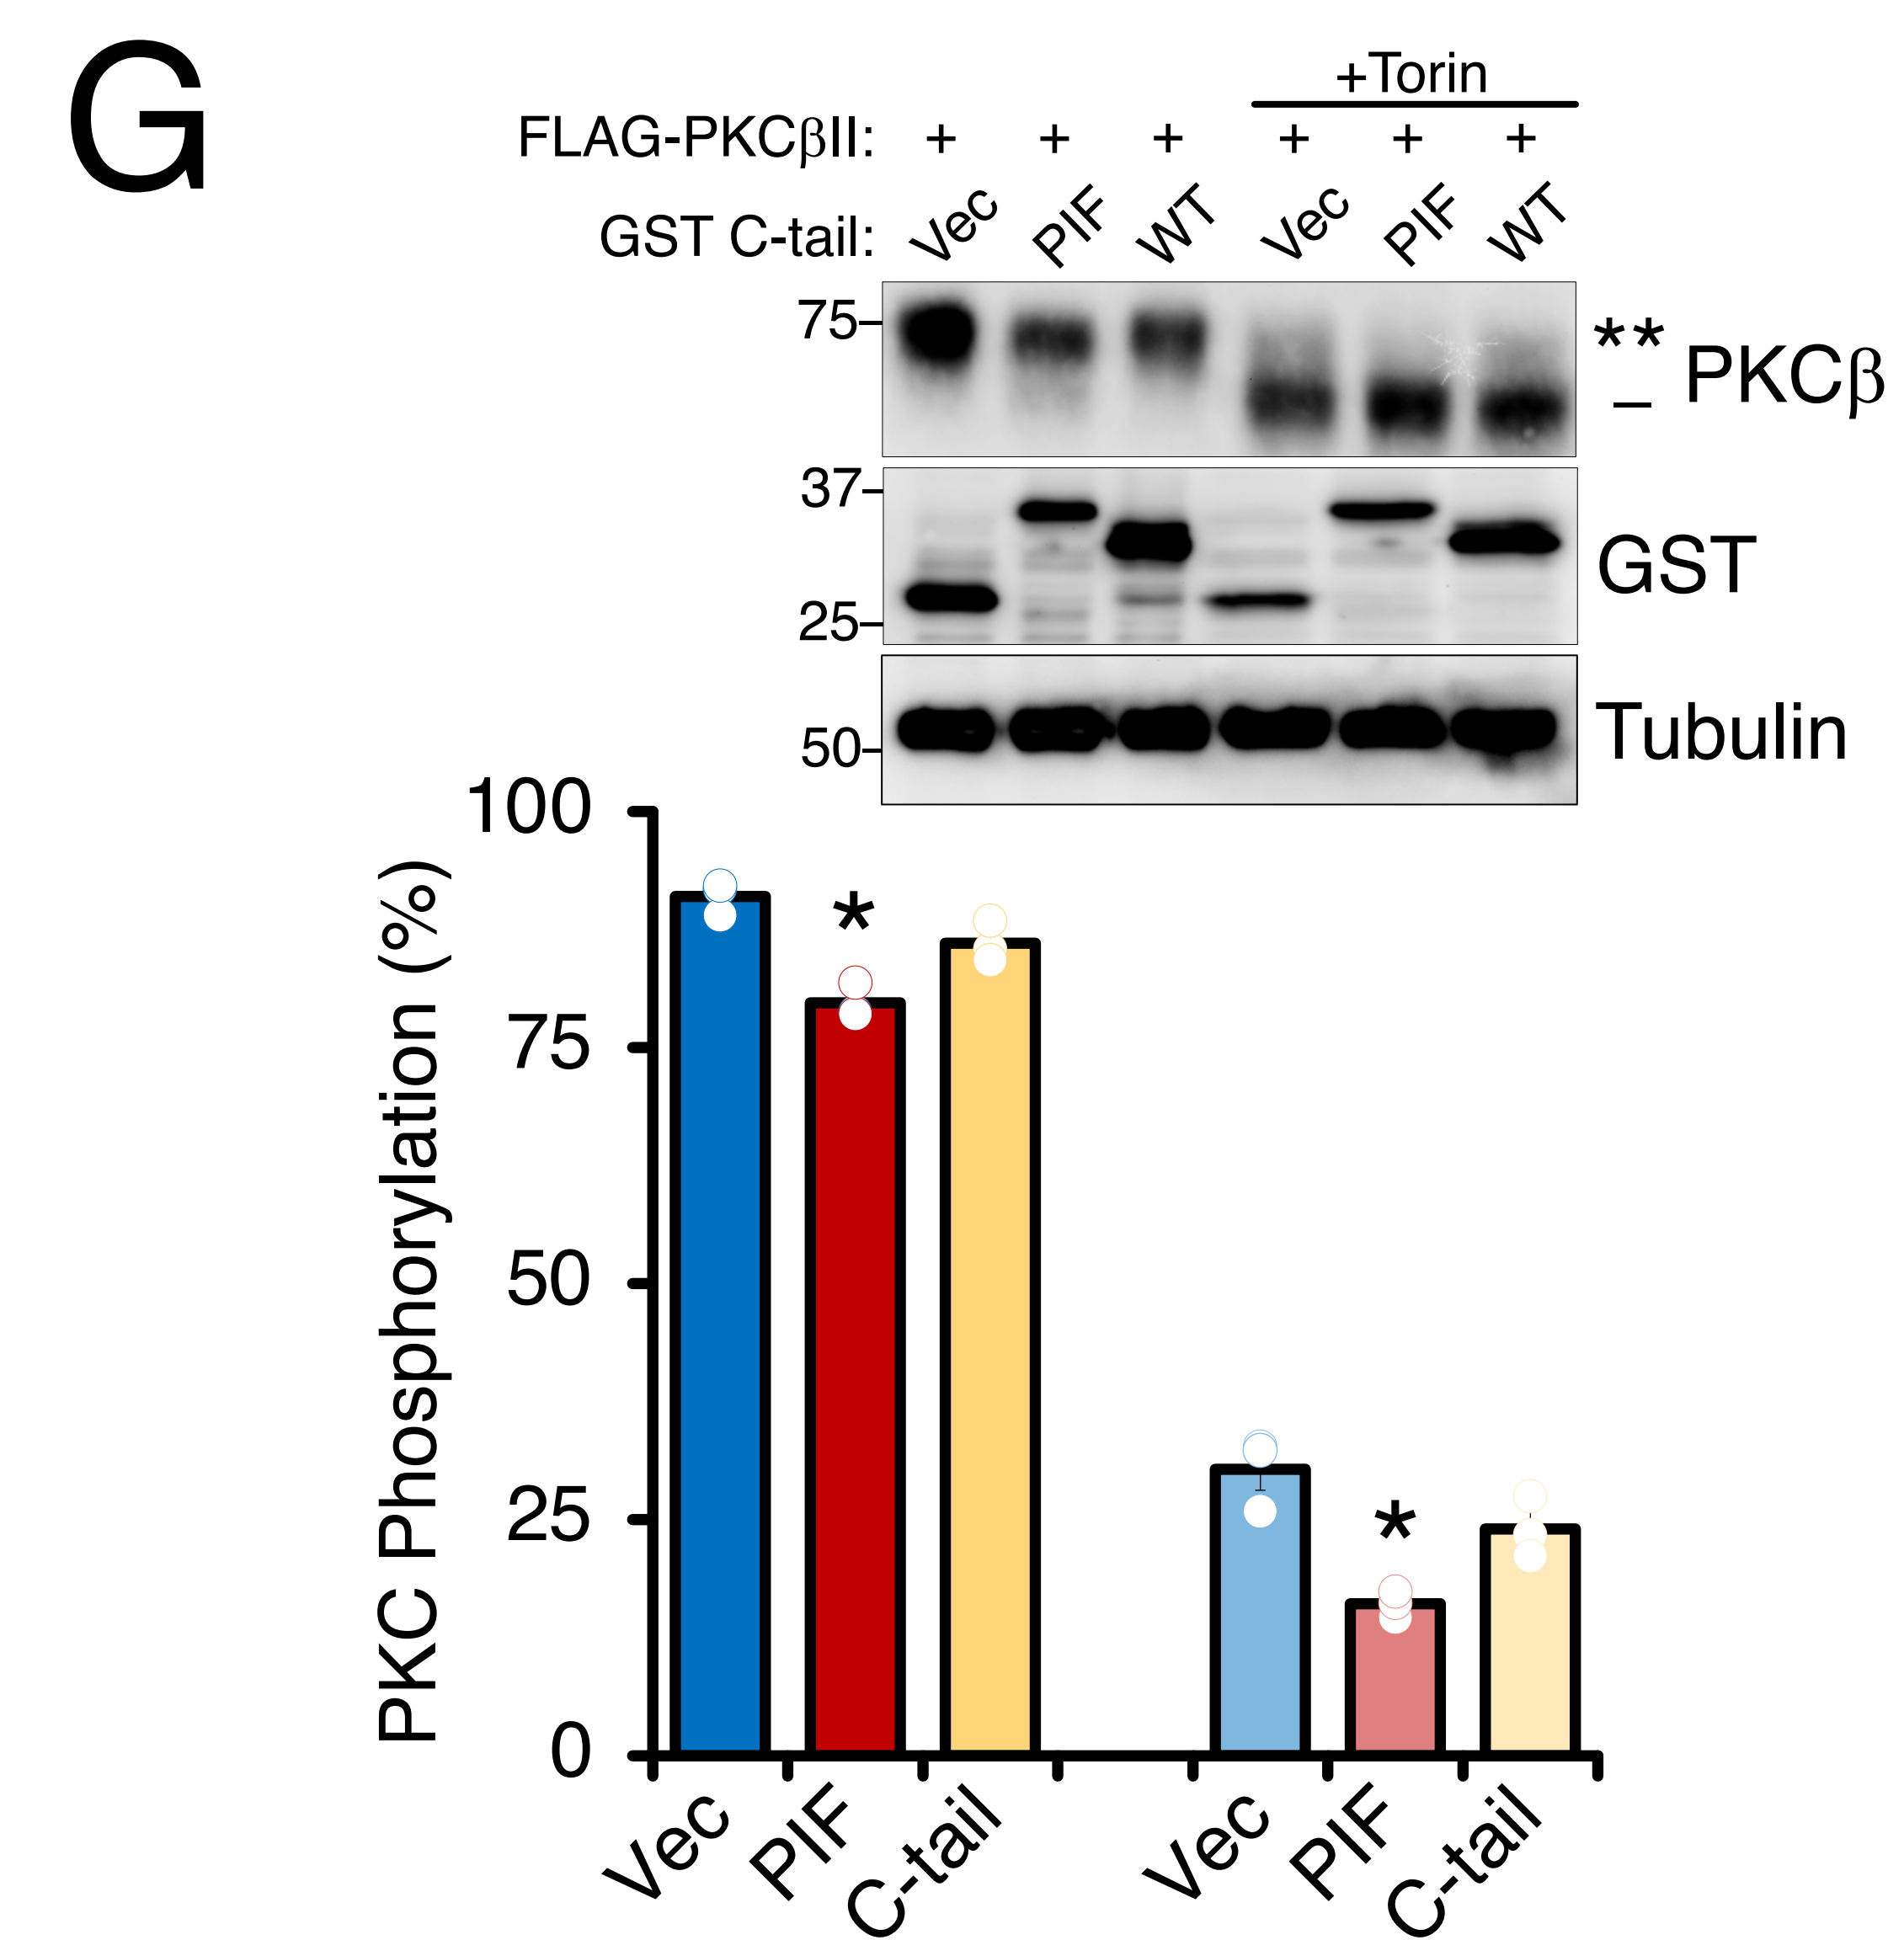

Supplement: NIHMS1708431-supplement-Figure_S9.pdf [file NIHMS1708431-supplement-Figure_S9.pdf]
